# Supplementary material
Source: MDPI journal article supplement (https://www.mdpi.com/2305-6320/10/11/61)
Supplement: s1 [file s1]

### **SFig. 1**

Raw data from animal experiments in practice of pharmacology

### **SFig. 2**

Posterior distributions of several parameters obtained by Model 1 and Model 2. (Left) trace plot, (Right) density plot. `mu0`, `log_sigma0`, and `adr` means  $\mu_0$ ,  $\log \sigma_0$ , and adrenaline respectively. Numbers in brackets mean as follows. 1: Procaile, 2: Lidocaine, 3: Mepivacaine, and 4: Bupivacaine.

### **SFig. 3**

Fitted probability curves by parameters estimated in Model 2. Red solid line: probability curve by the fixed effect model, Blue dashed line: probability curve by the random effect model.

### **SFig. 4**

Results of simulation using estimated parameters (Parameter 1 in Table 5)

### **SFig. 5**

Results of simulation using estimated parameters (Parameter 2 in Table 5)
