# Supplementary material
Source: MDPI journal article supplement (https://www.mdpi.com/2305-6320/10/11/61)

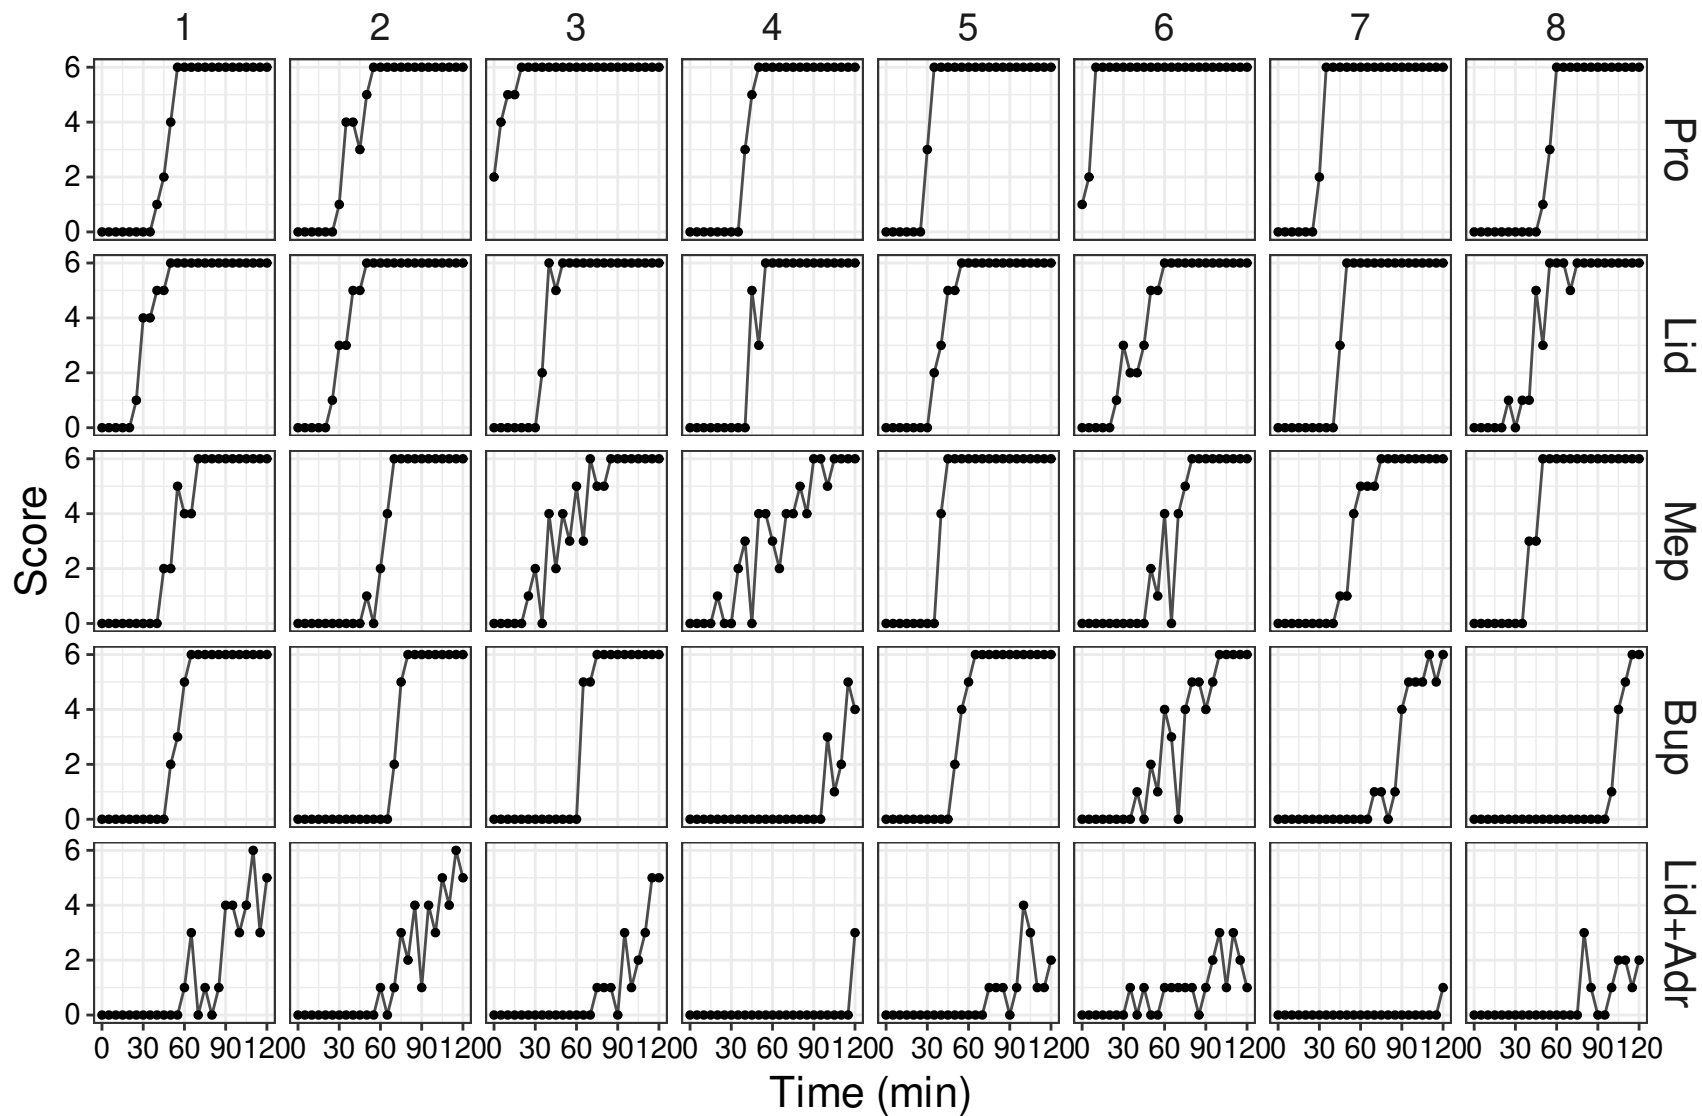

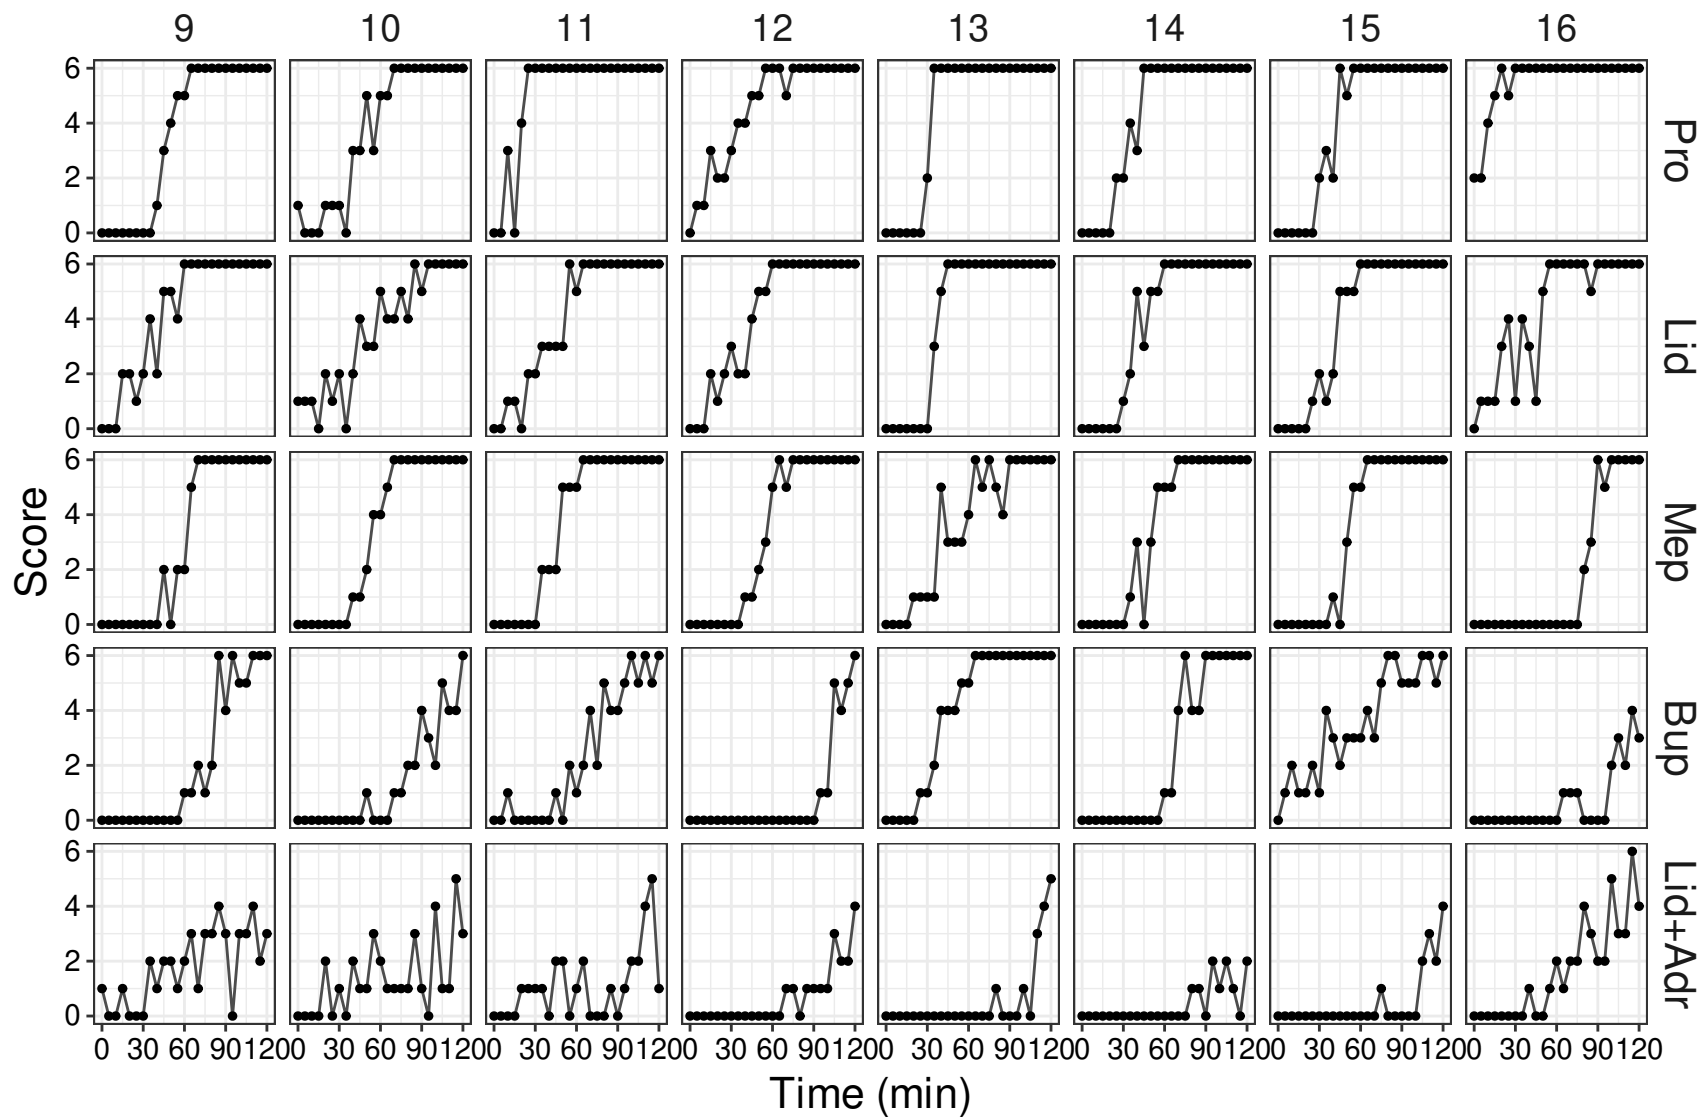

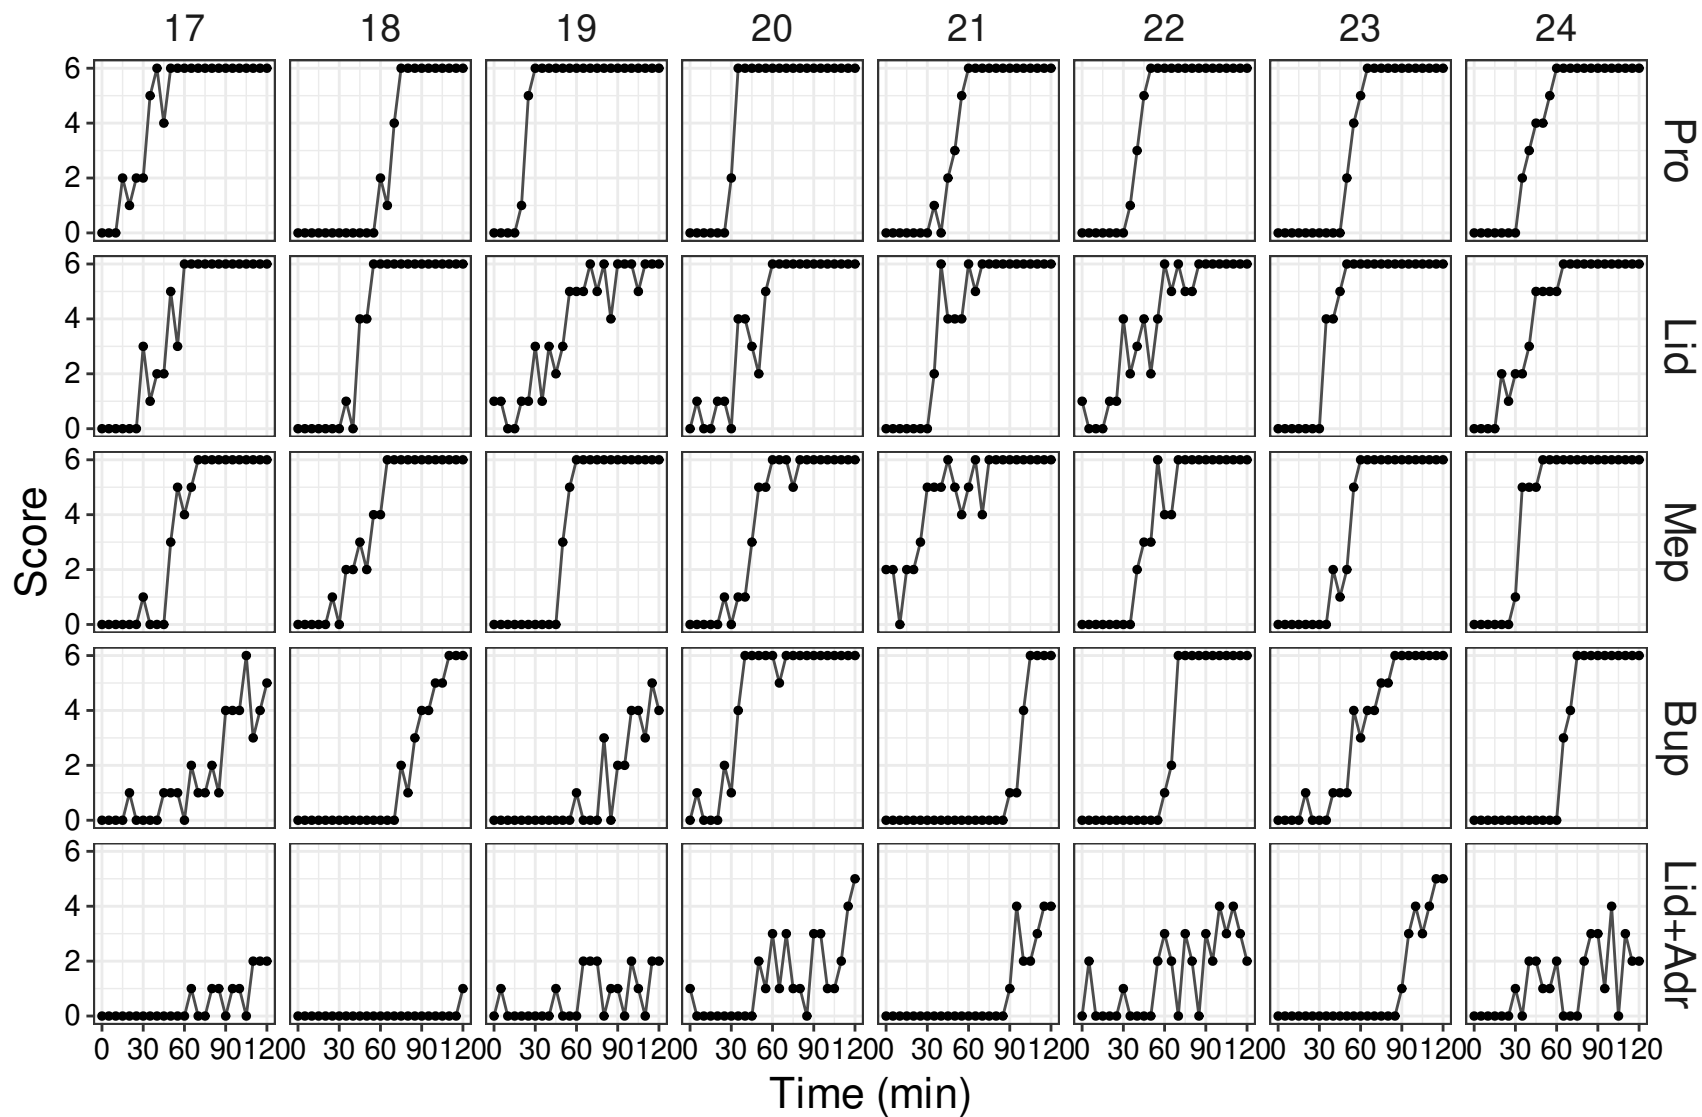

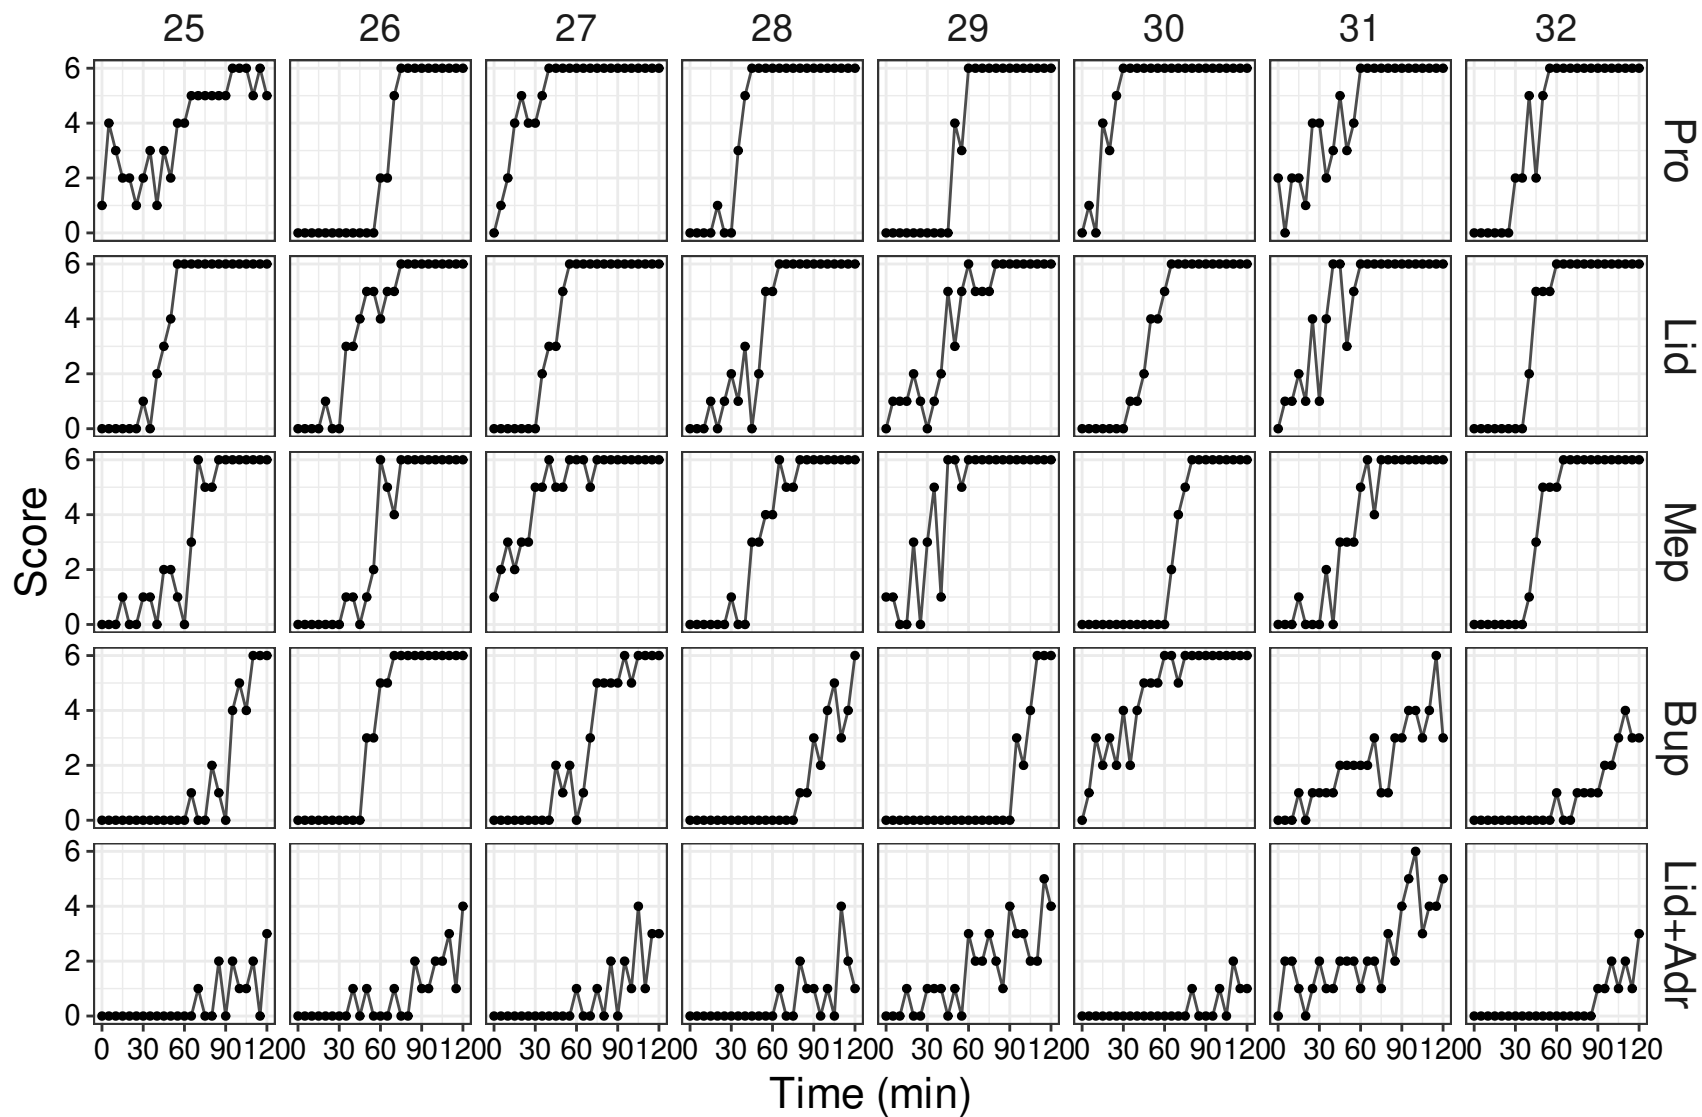

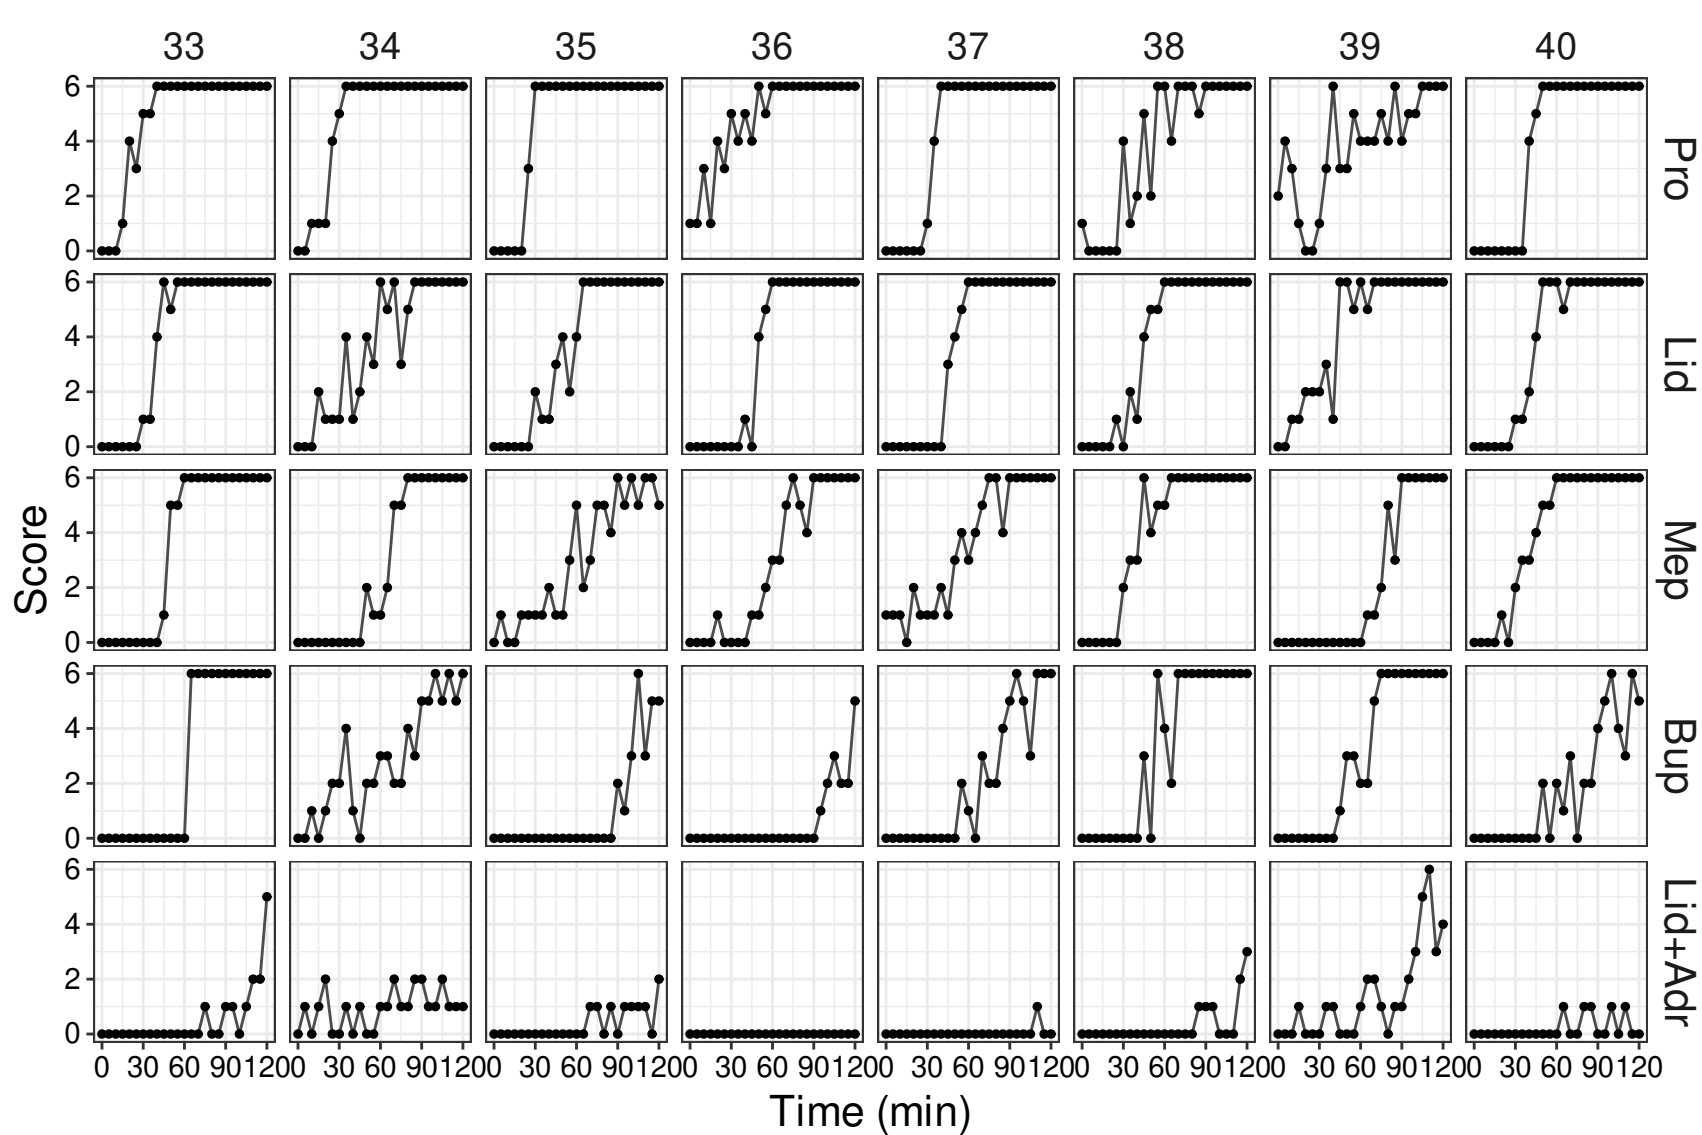

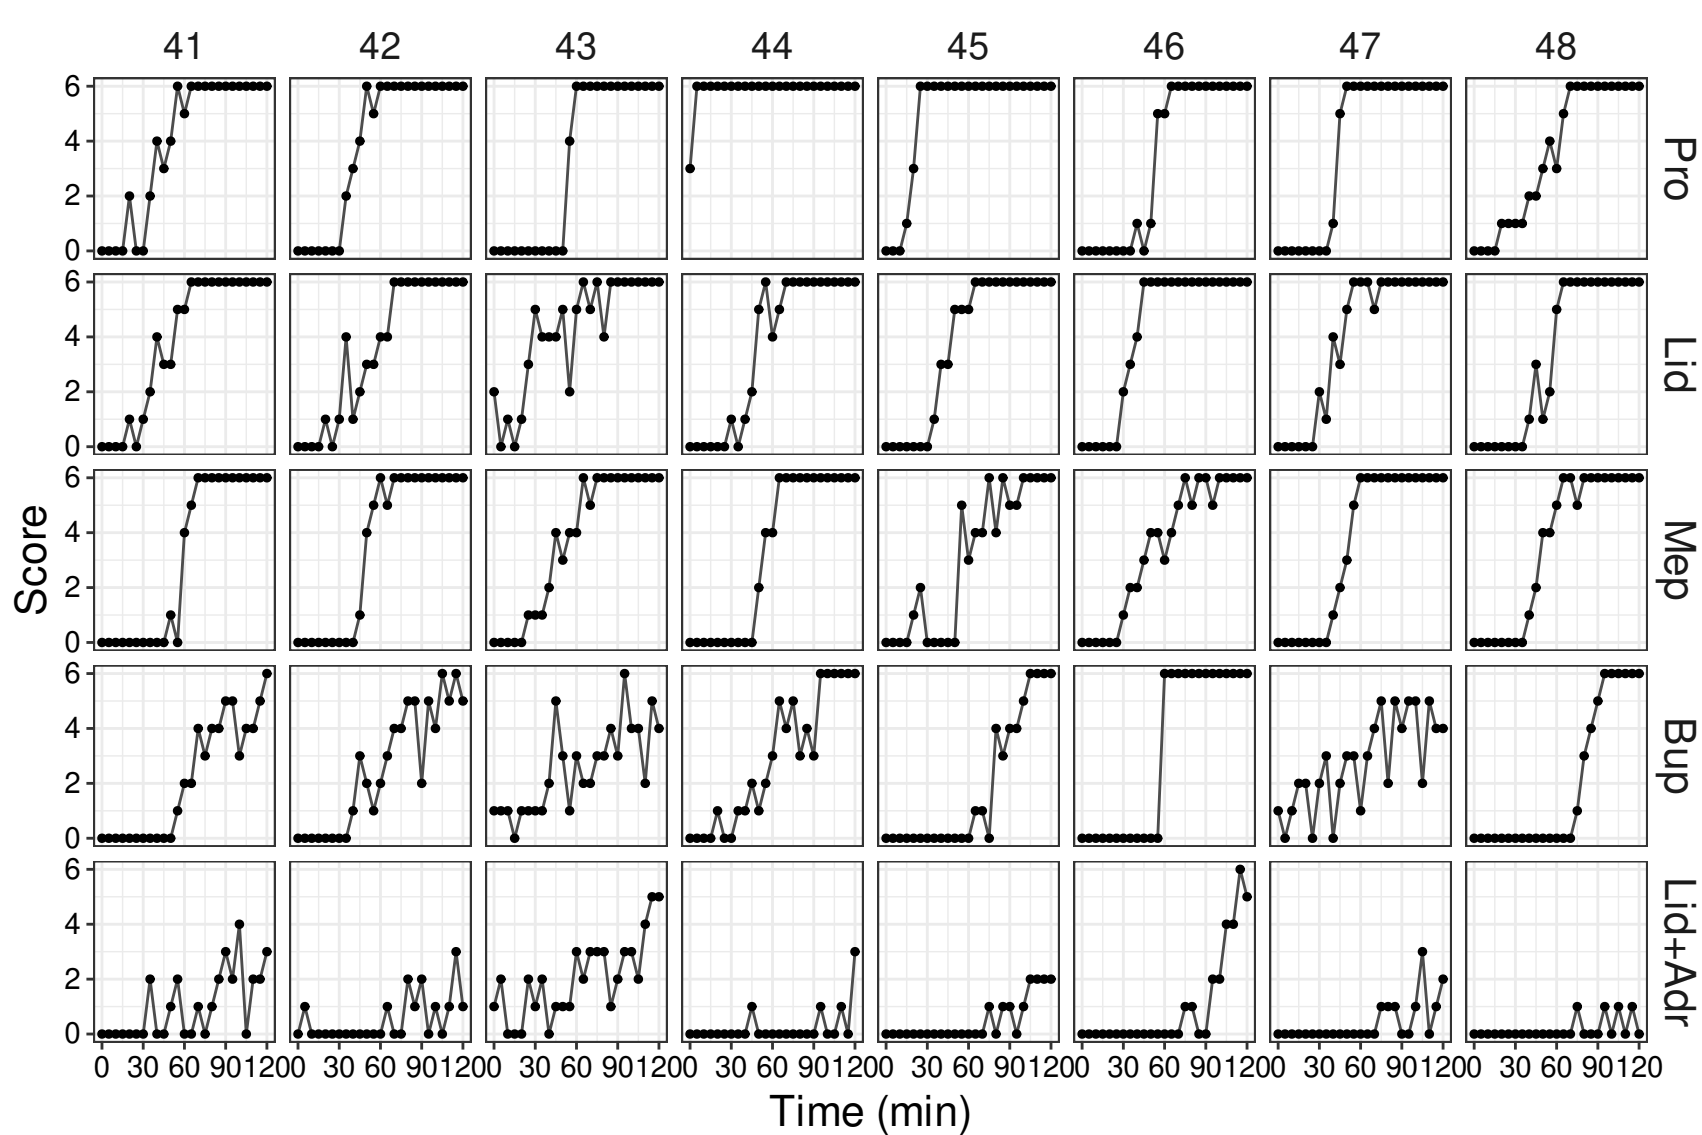

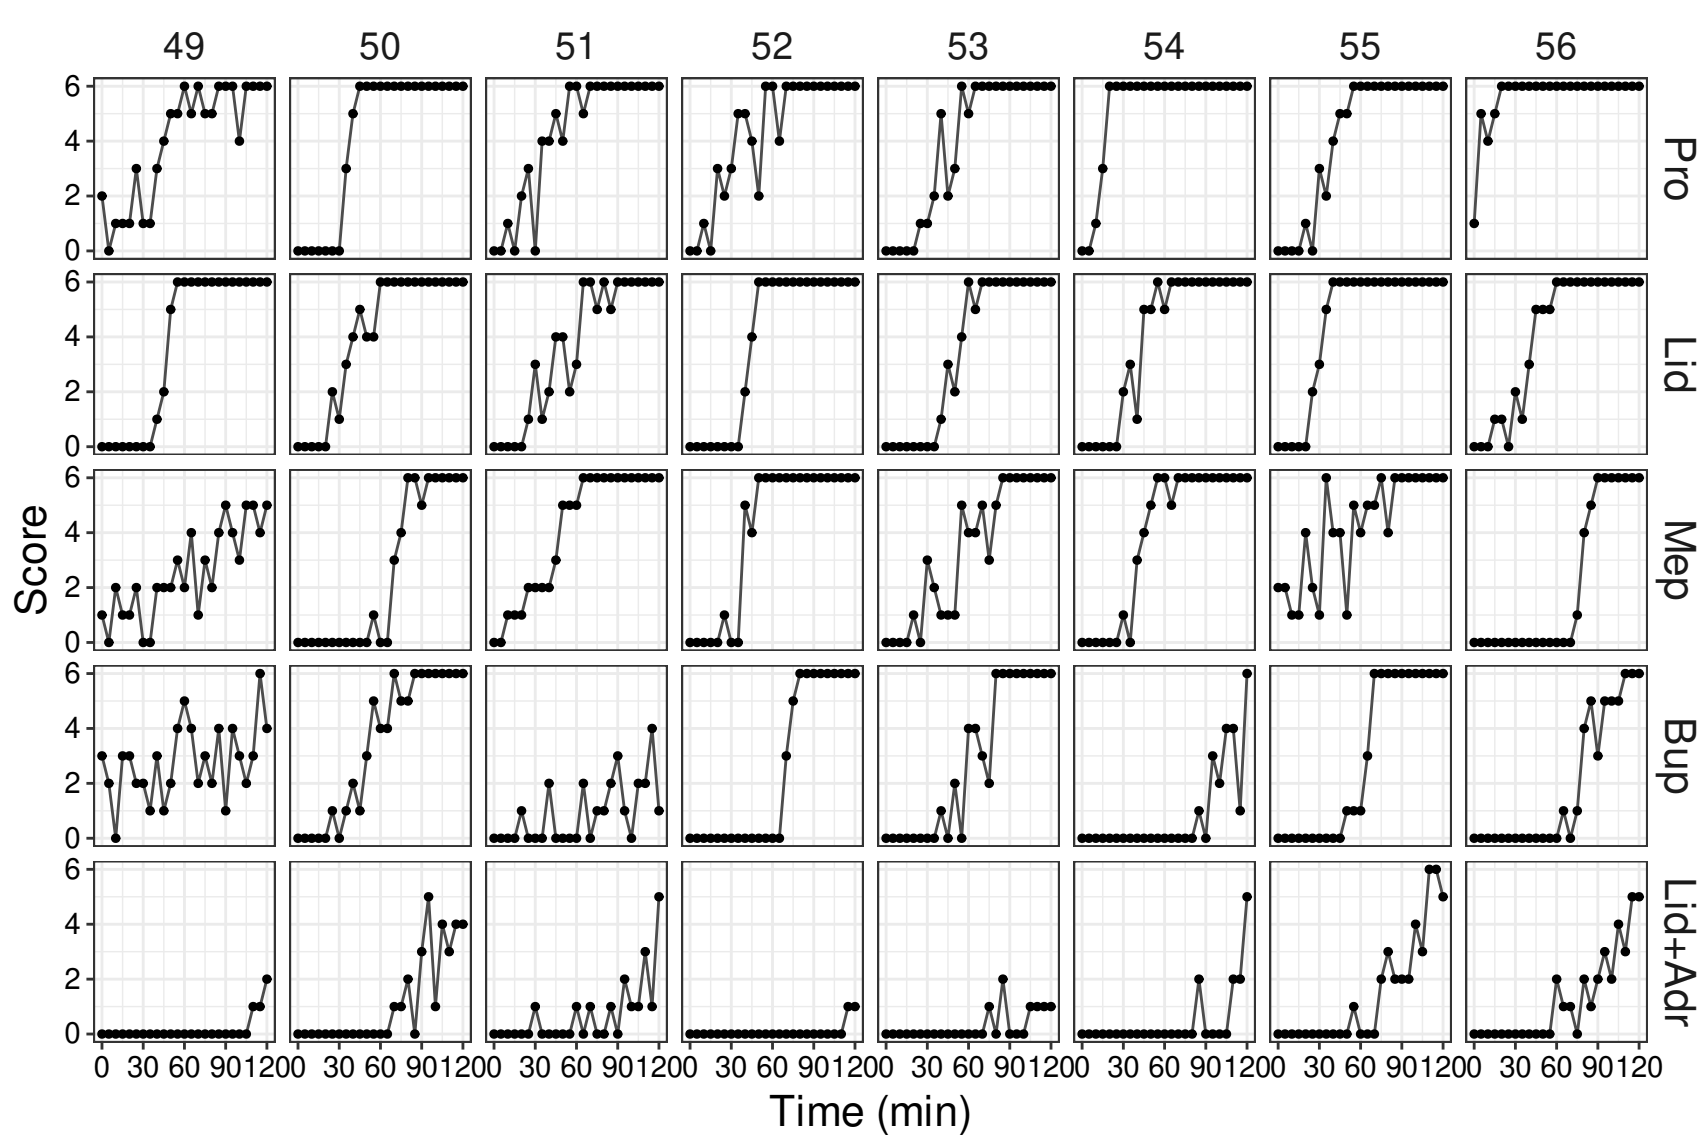

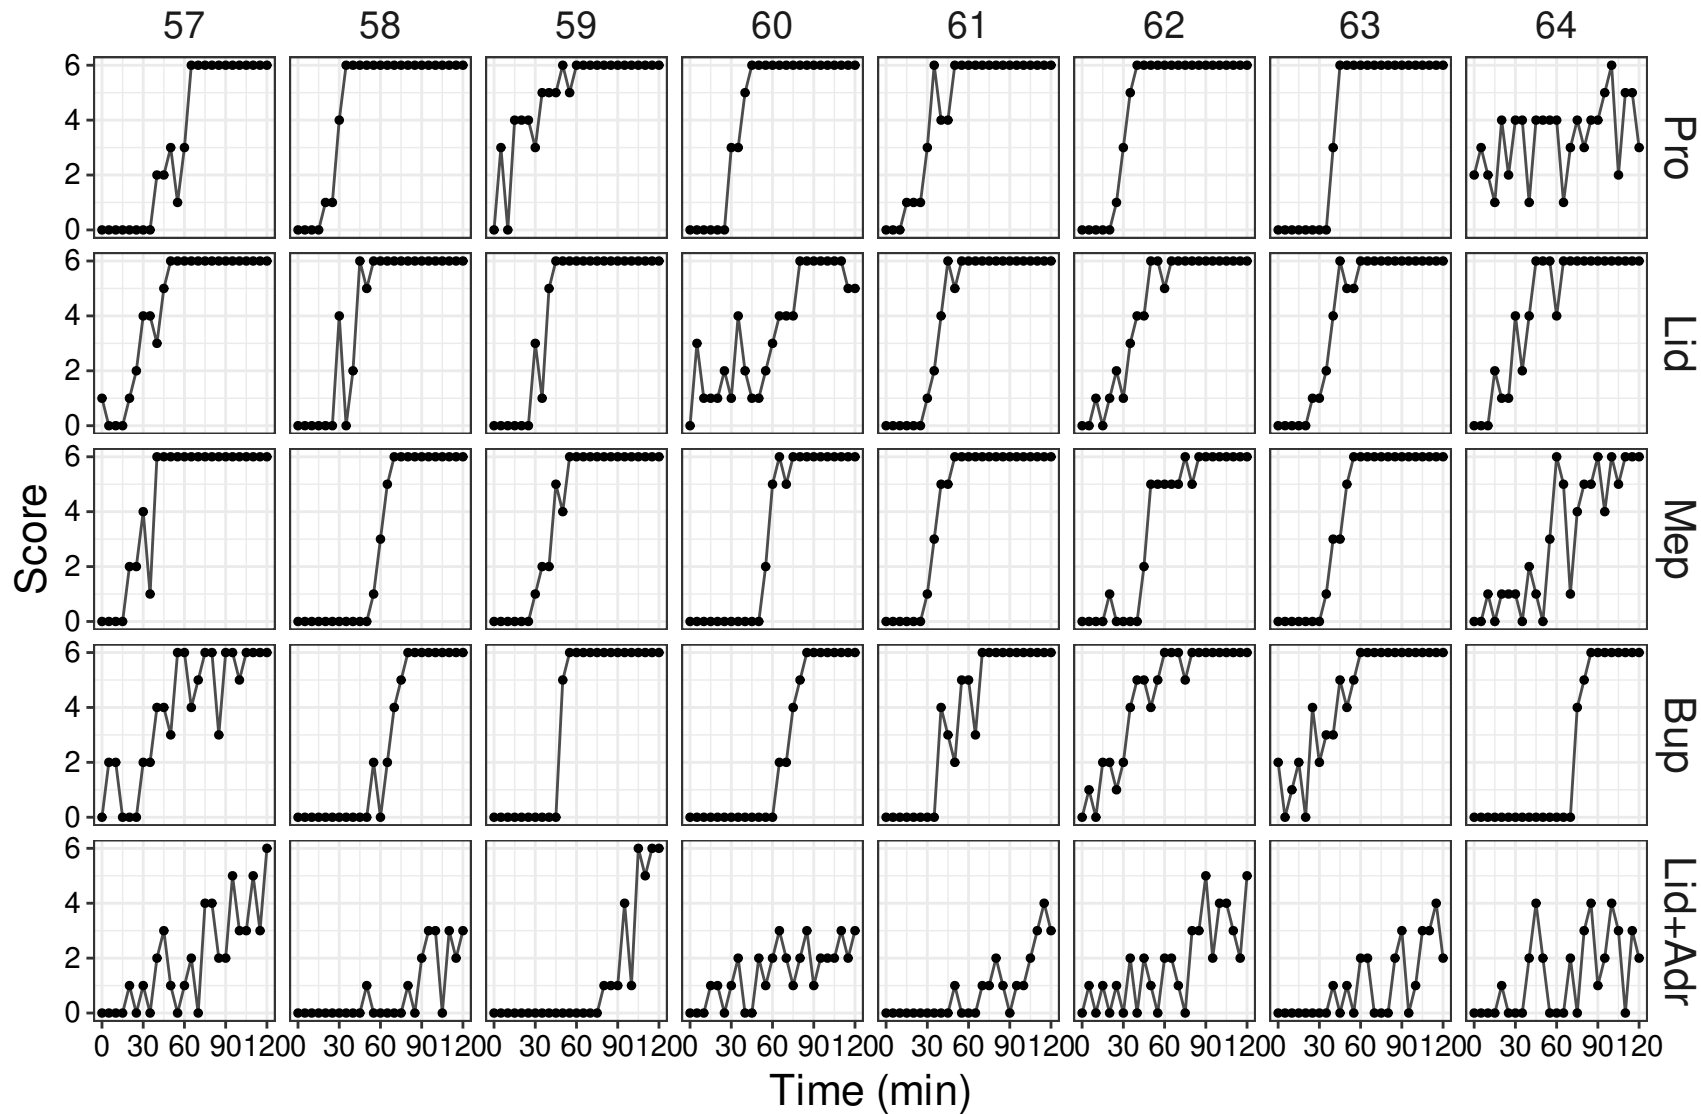



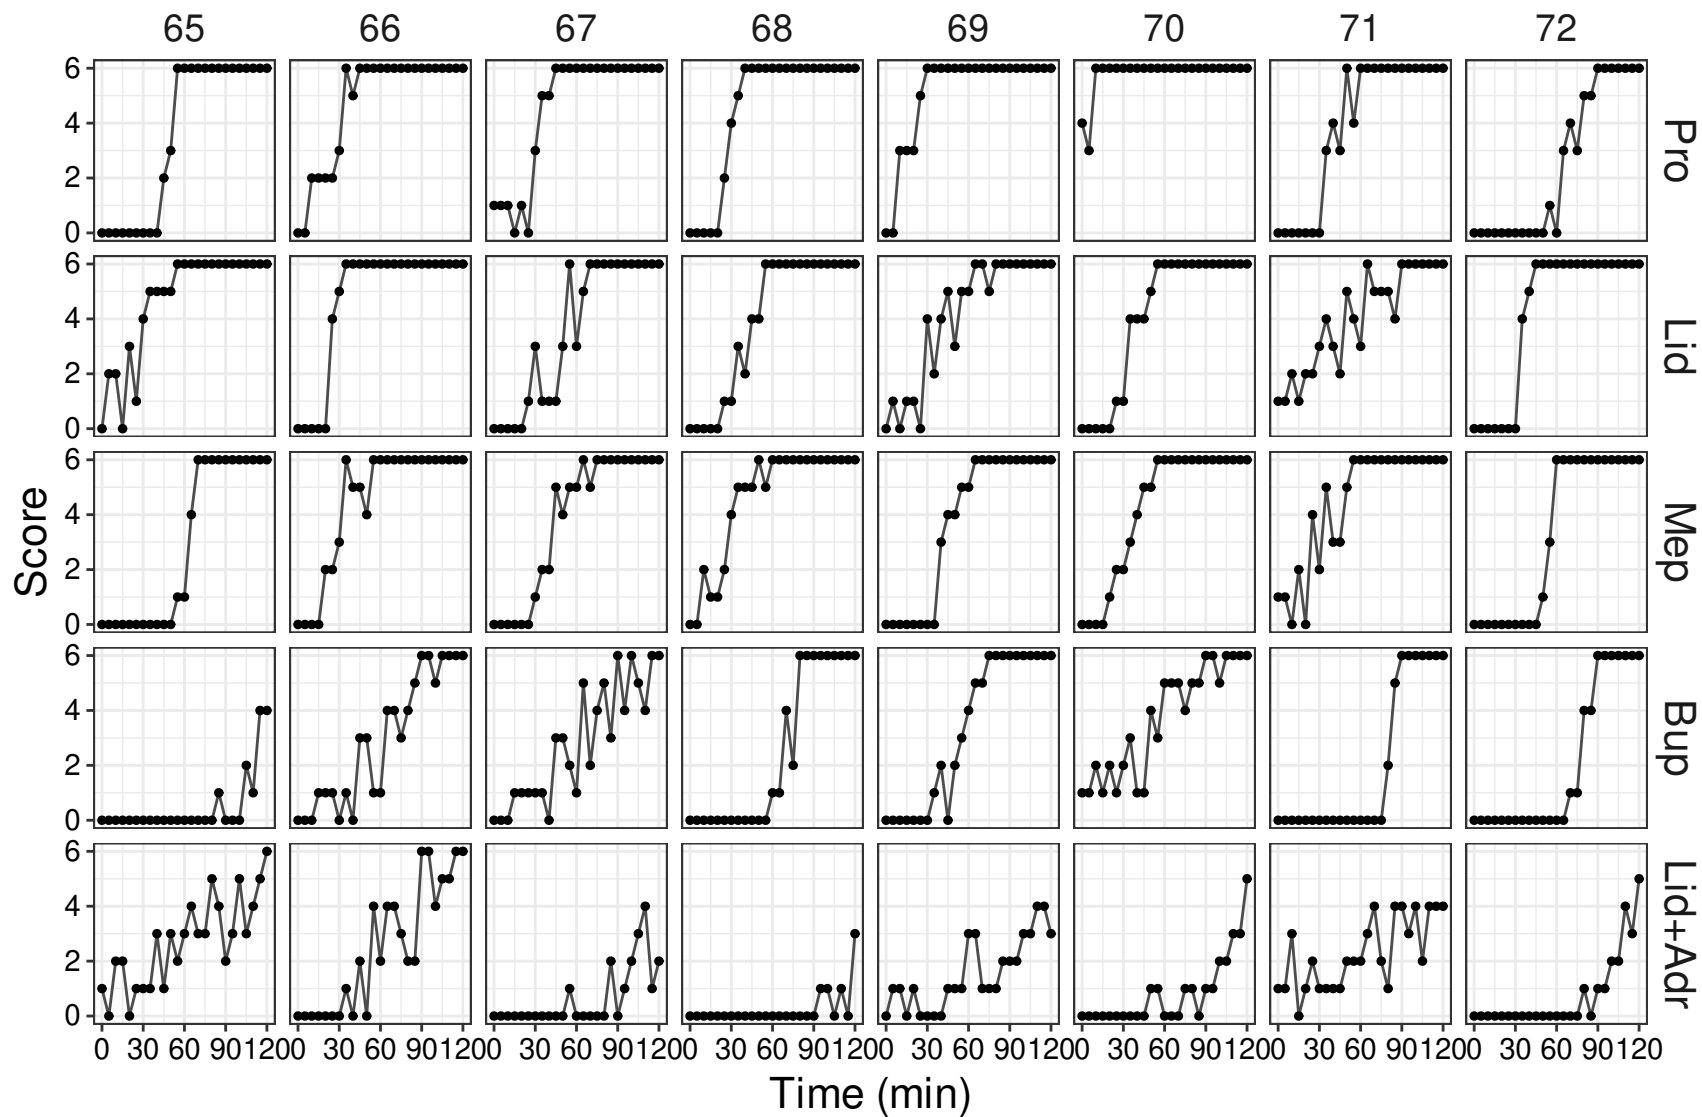

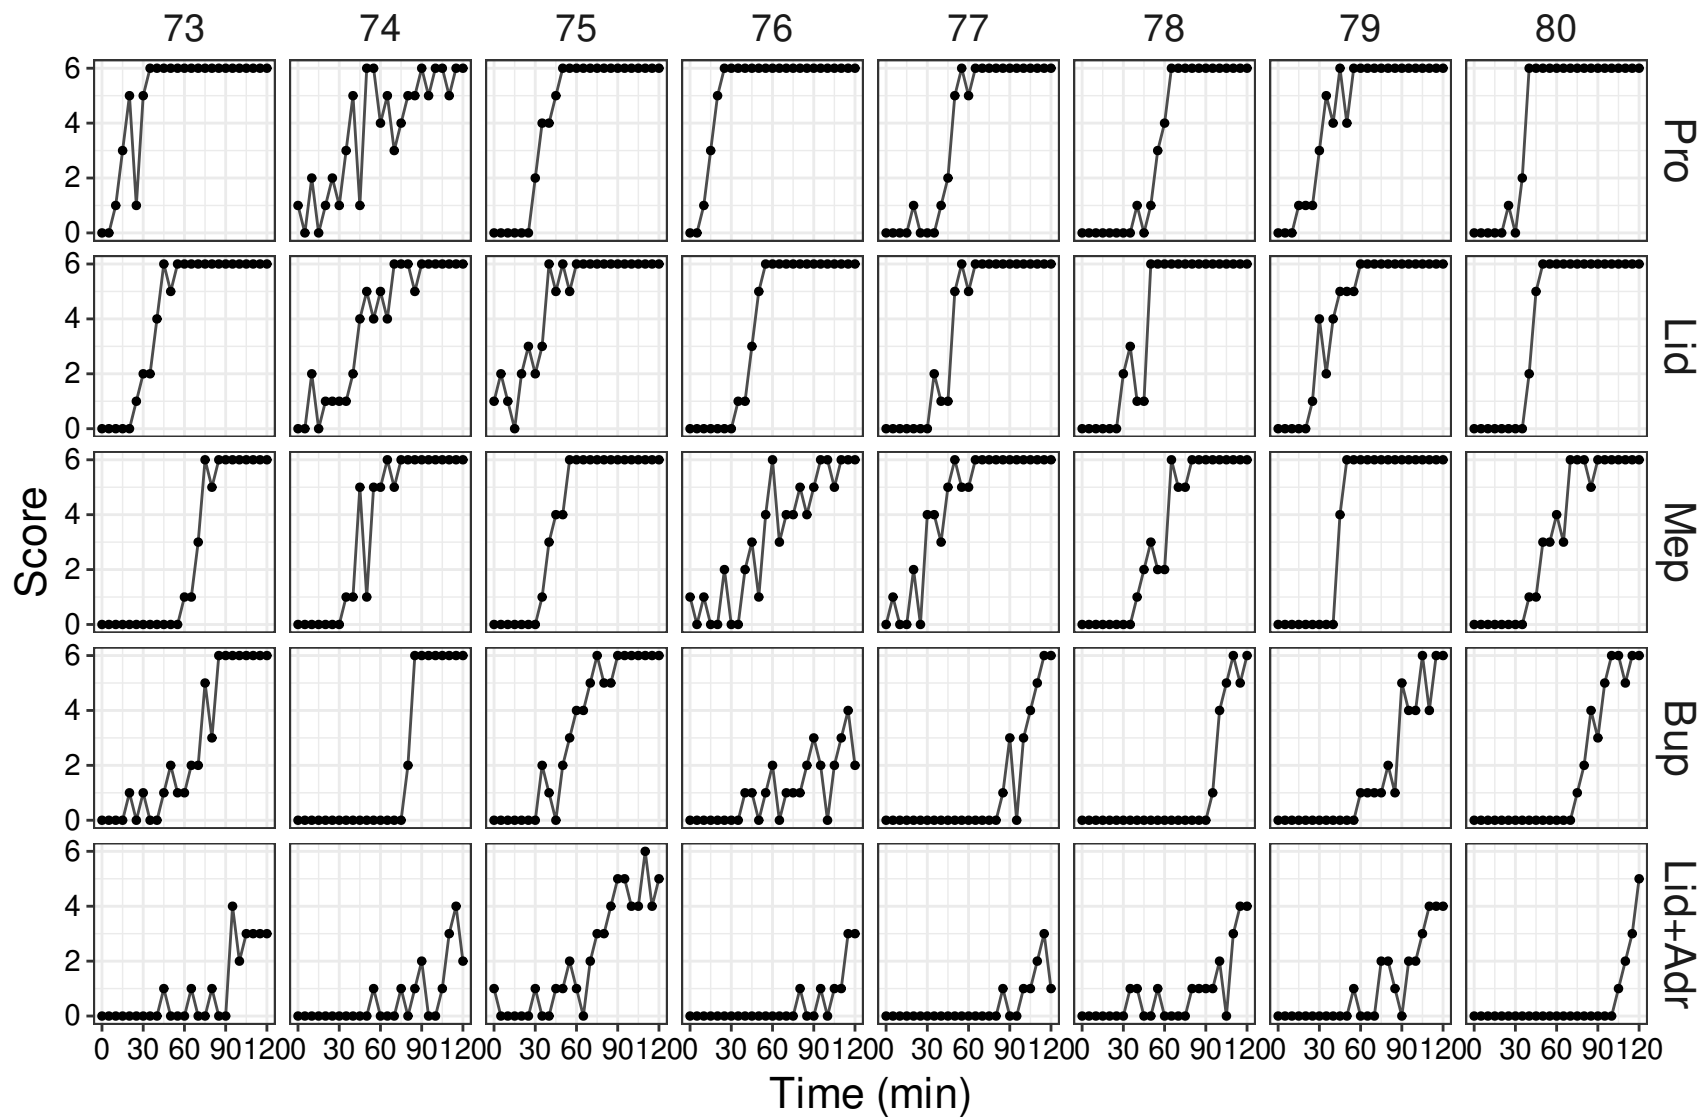

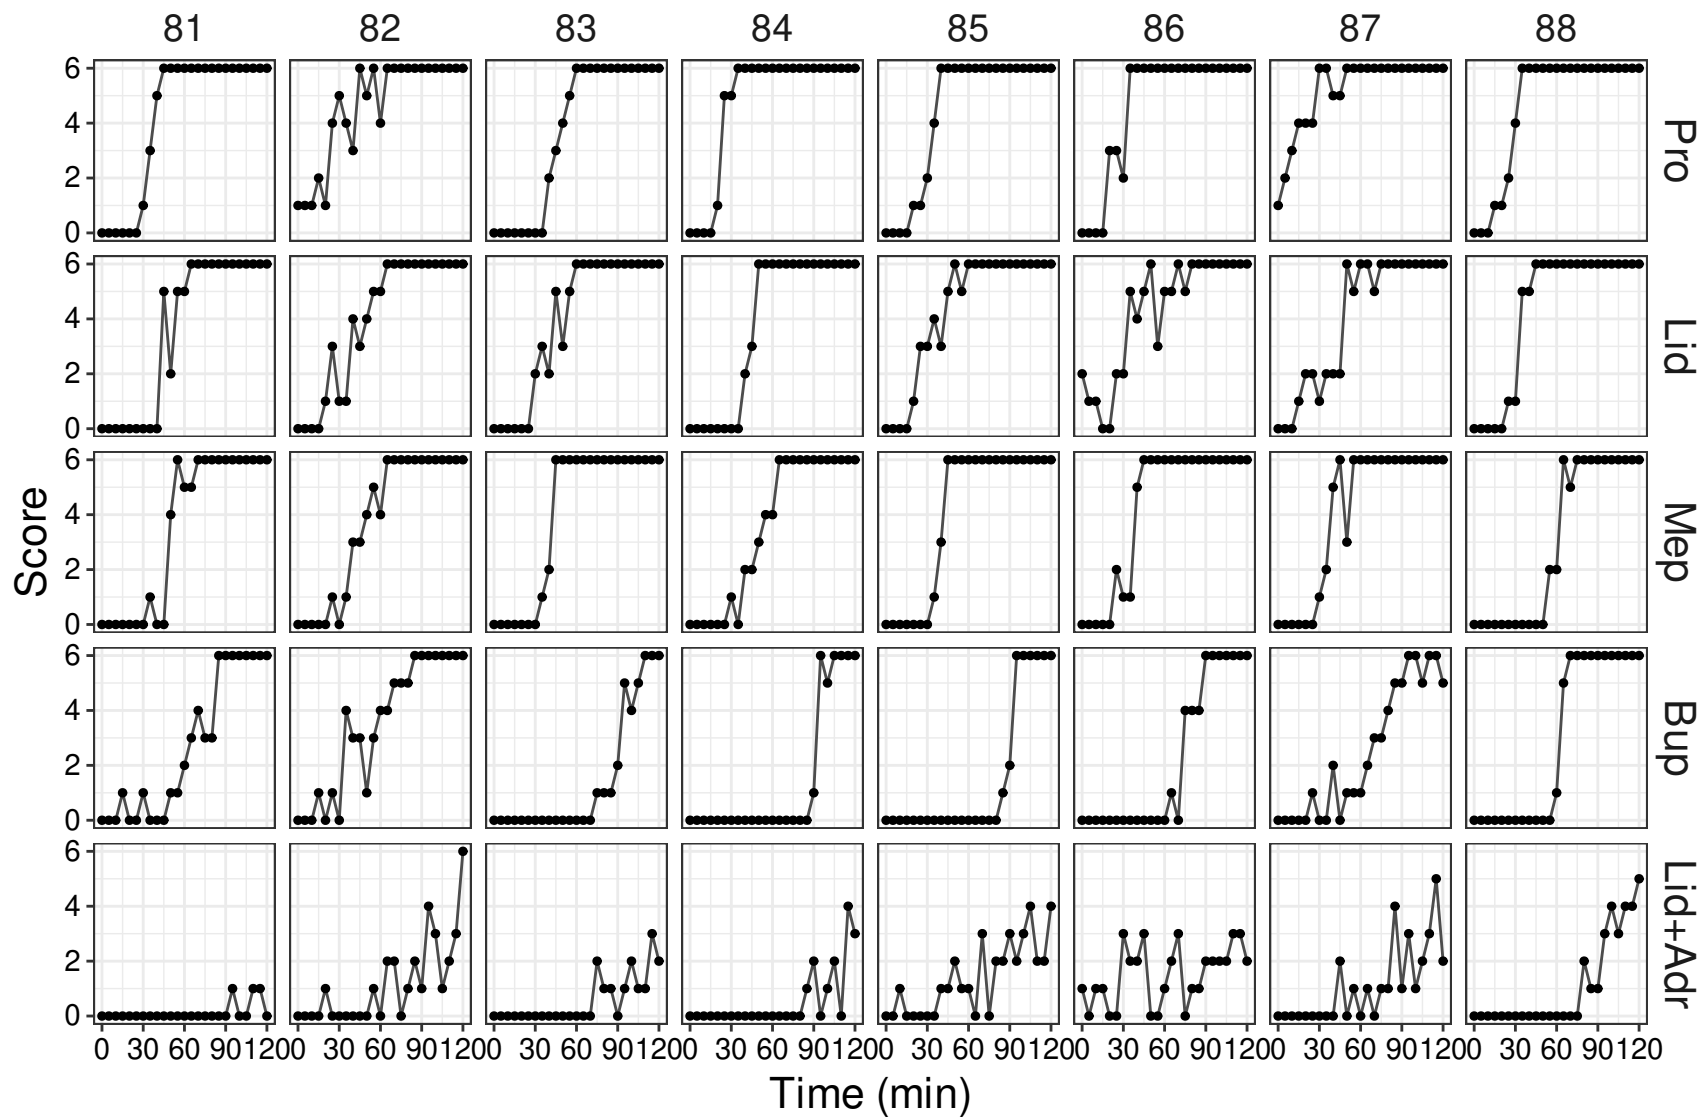

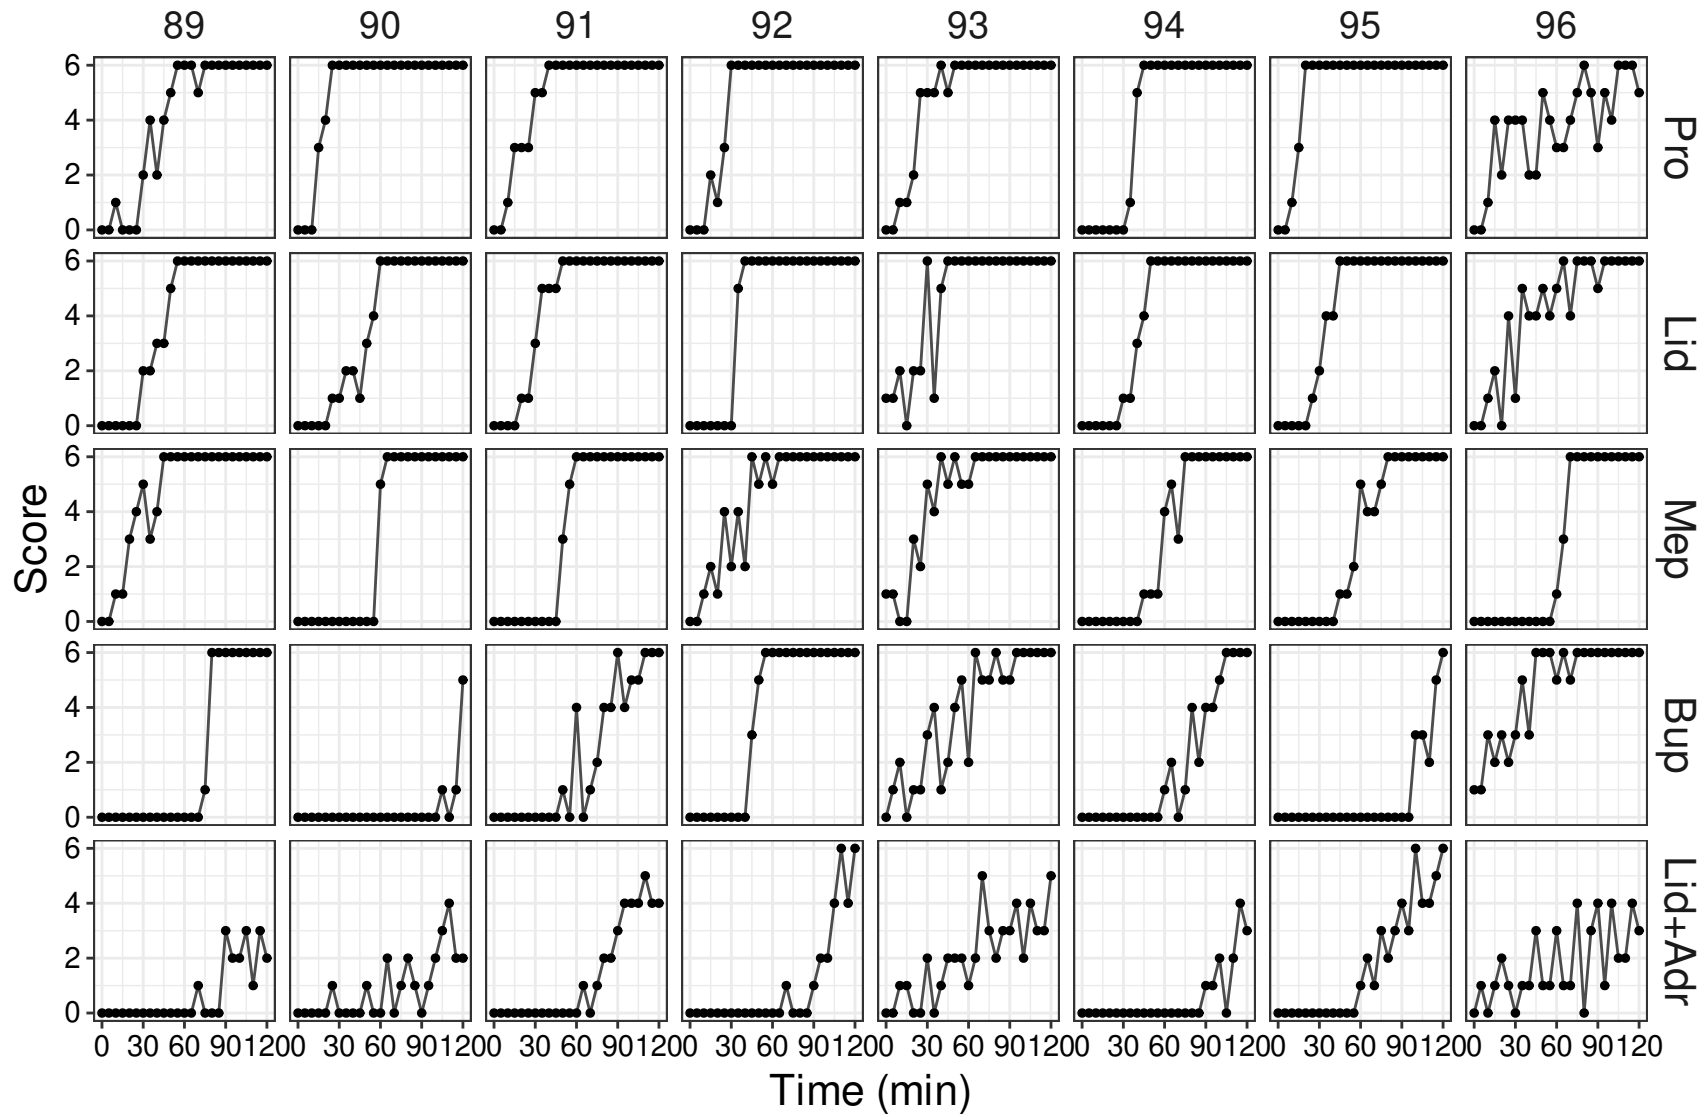

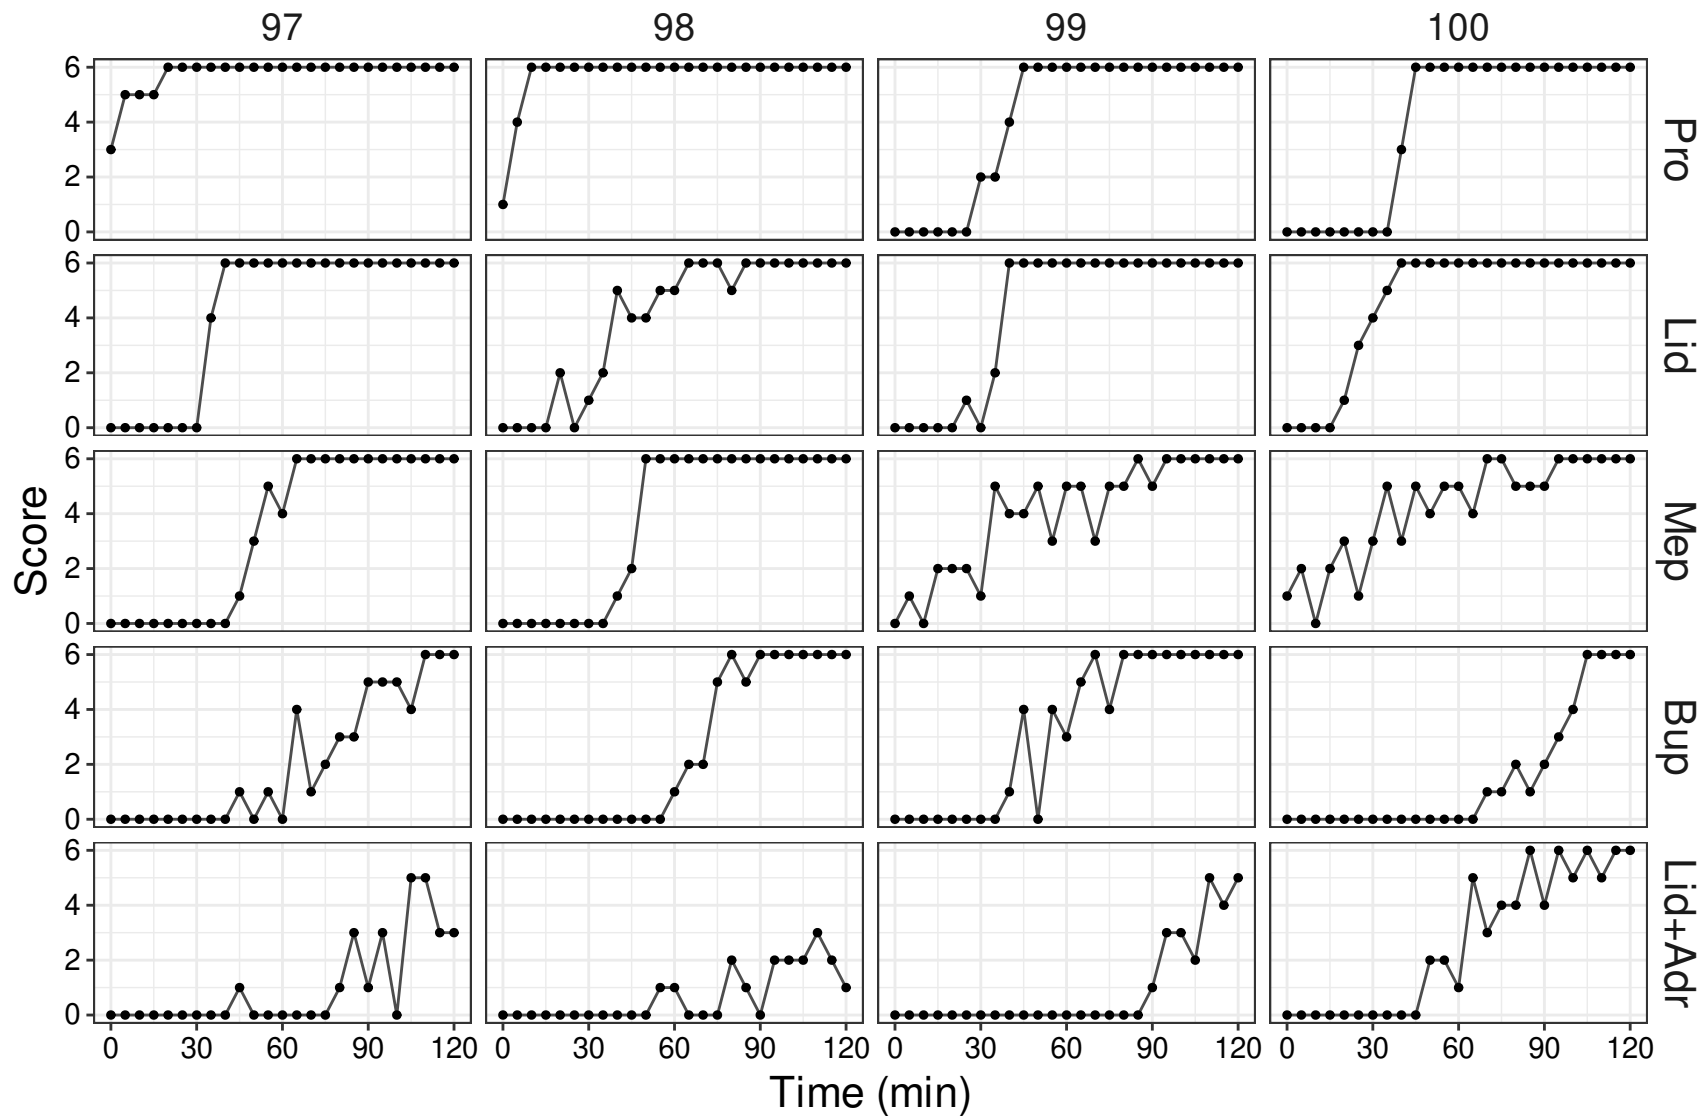

Supplement: s1 [file s1]

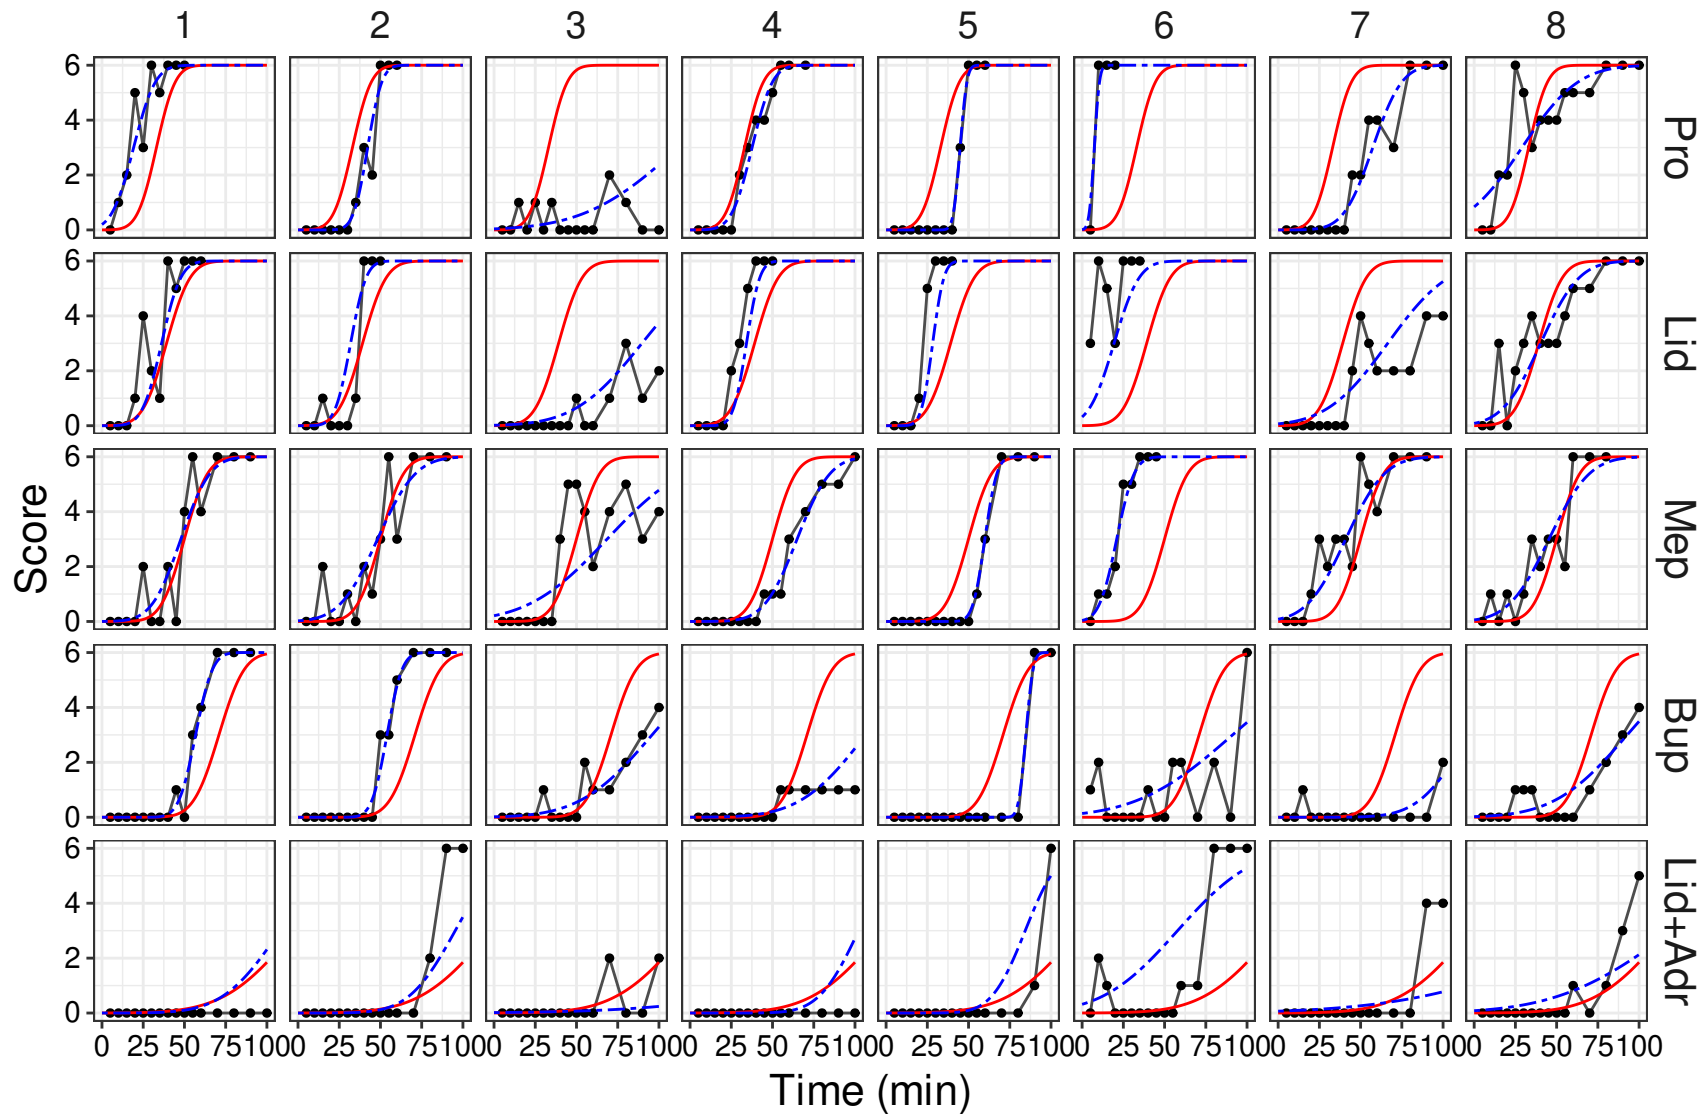

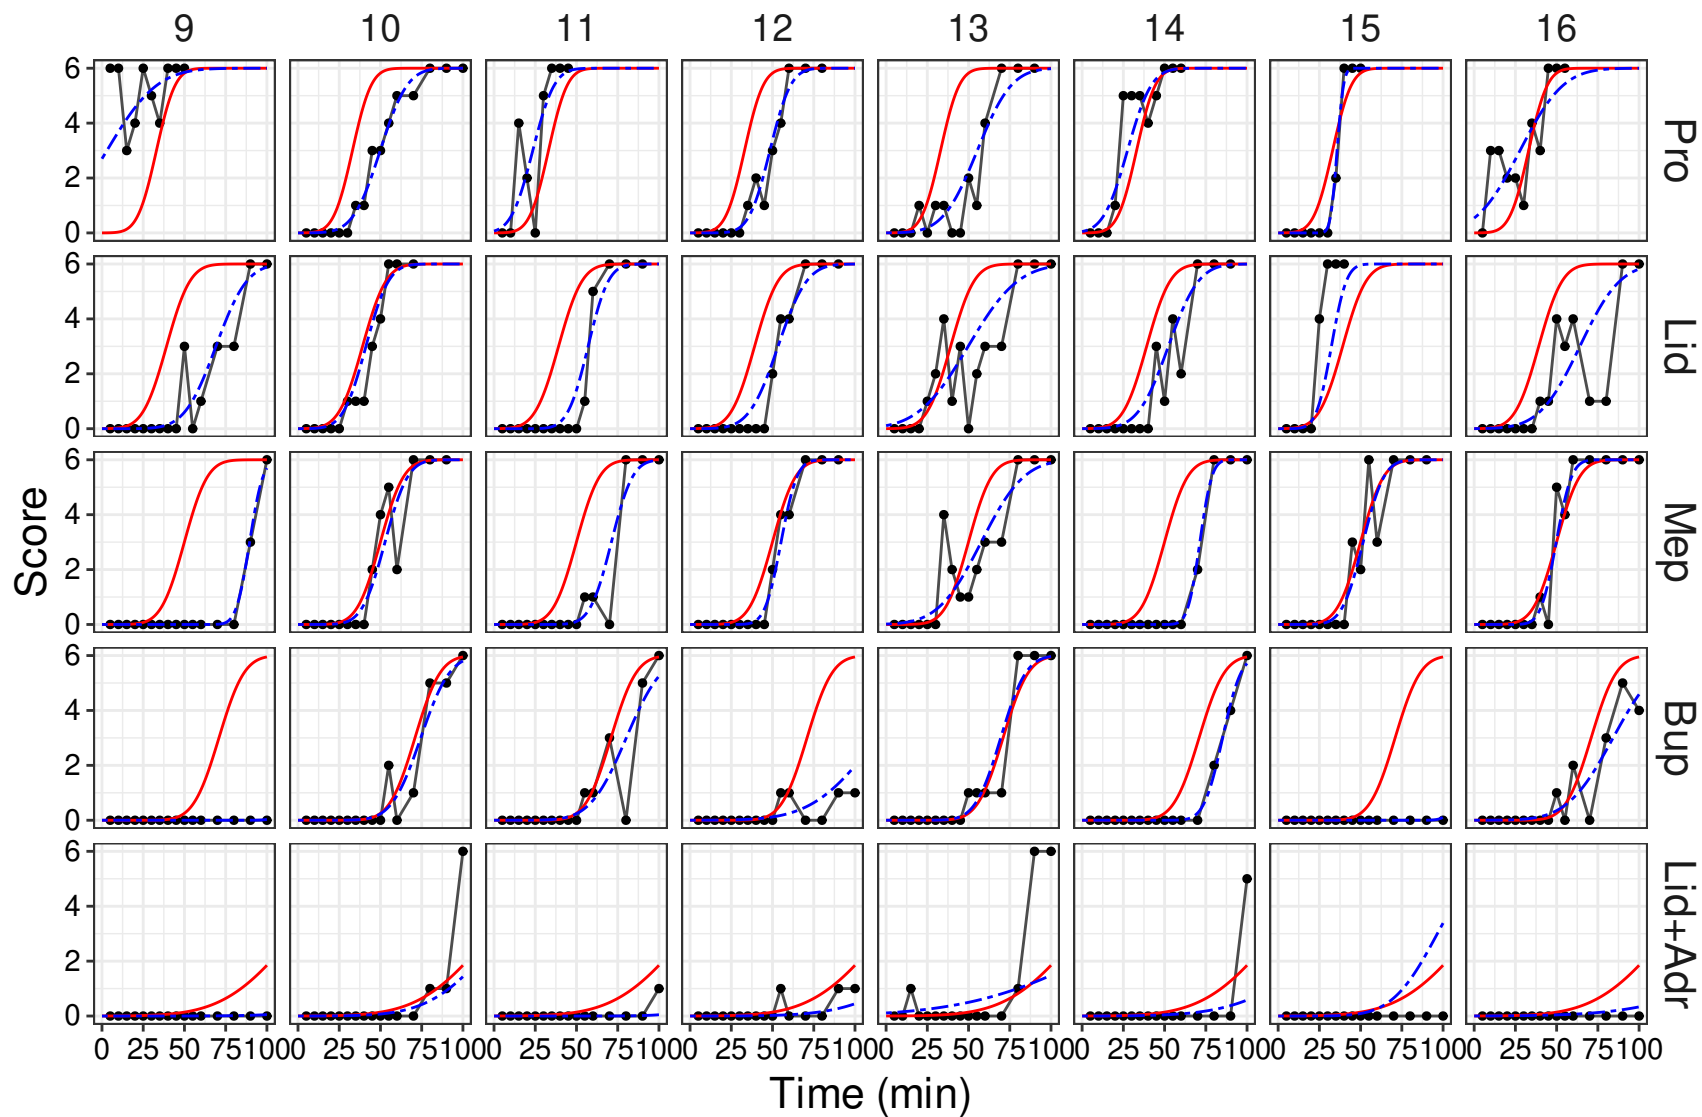

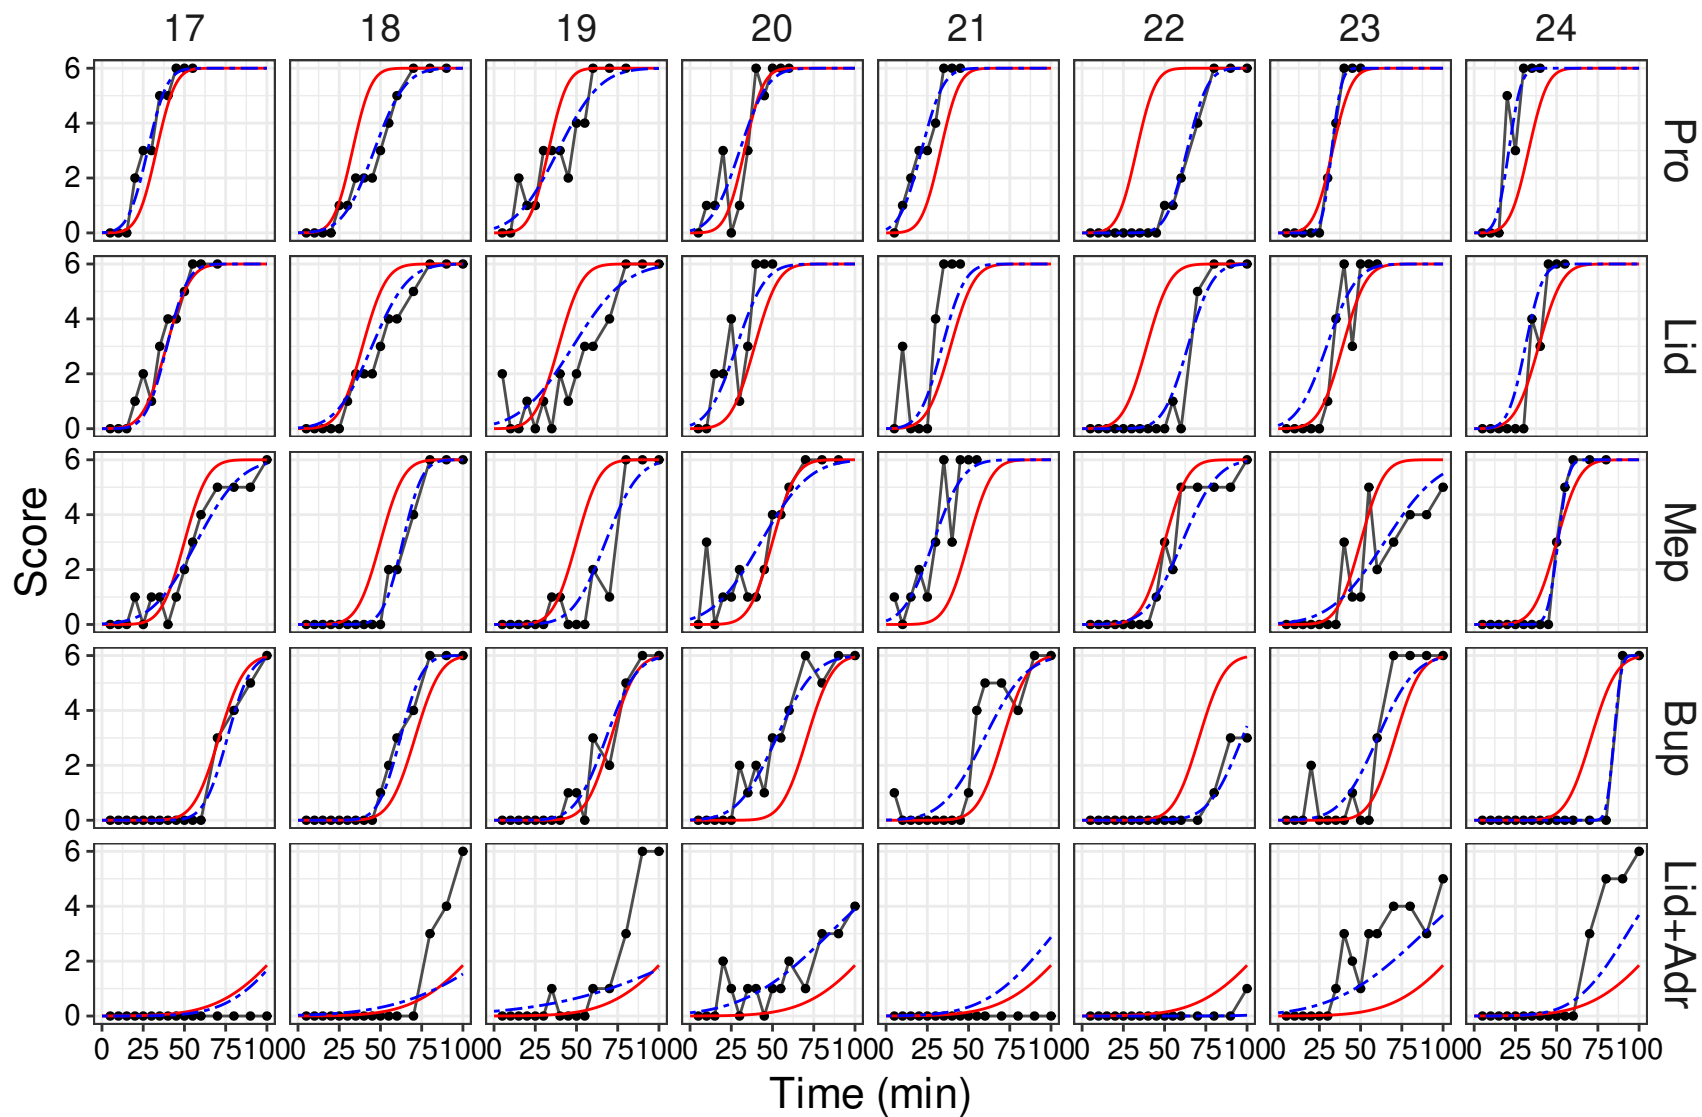

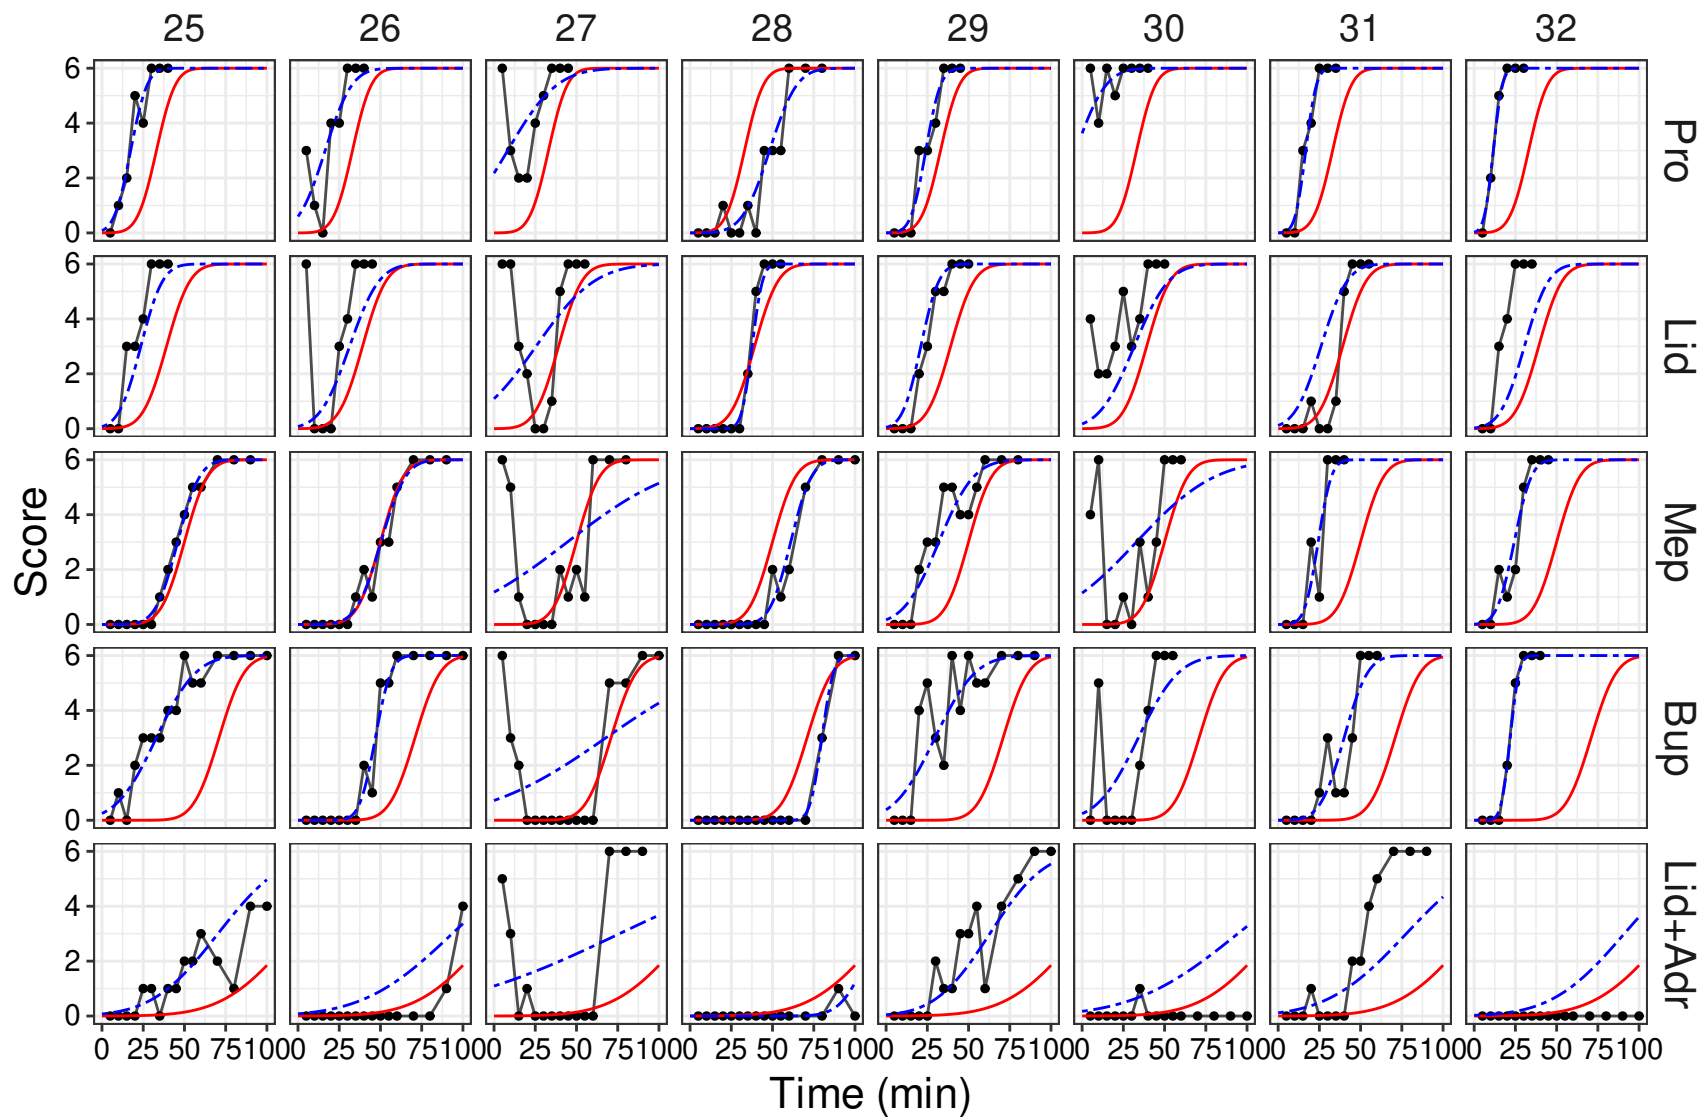

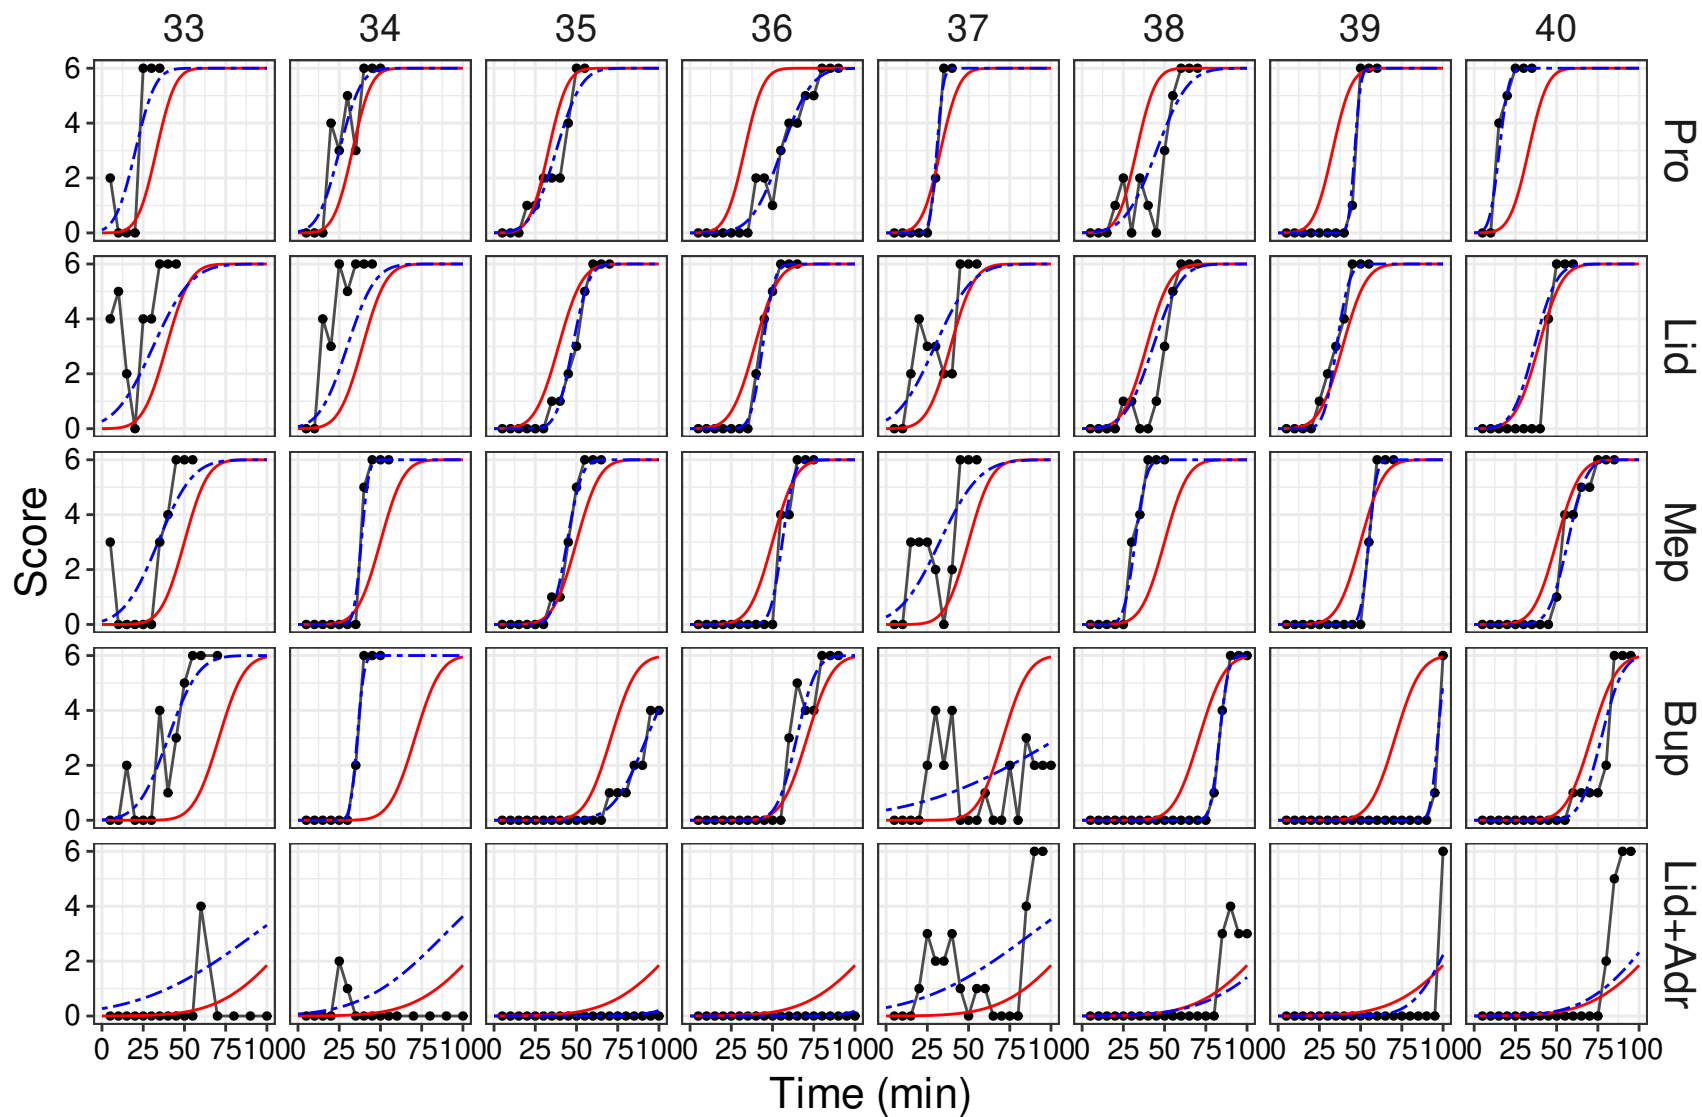

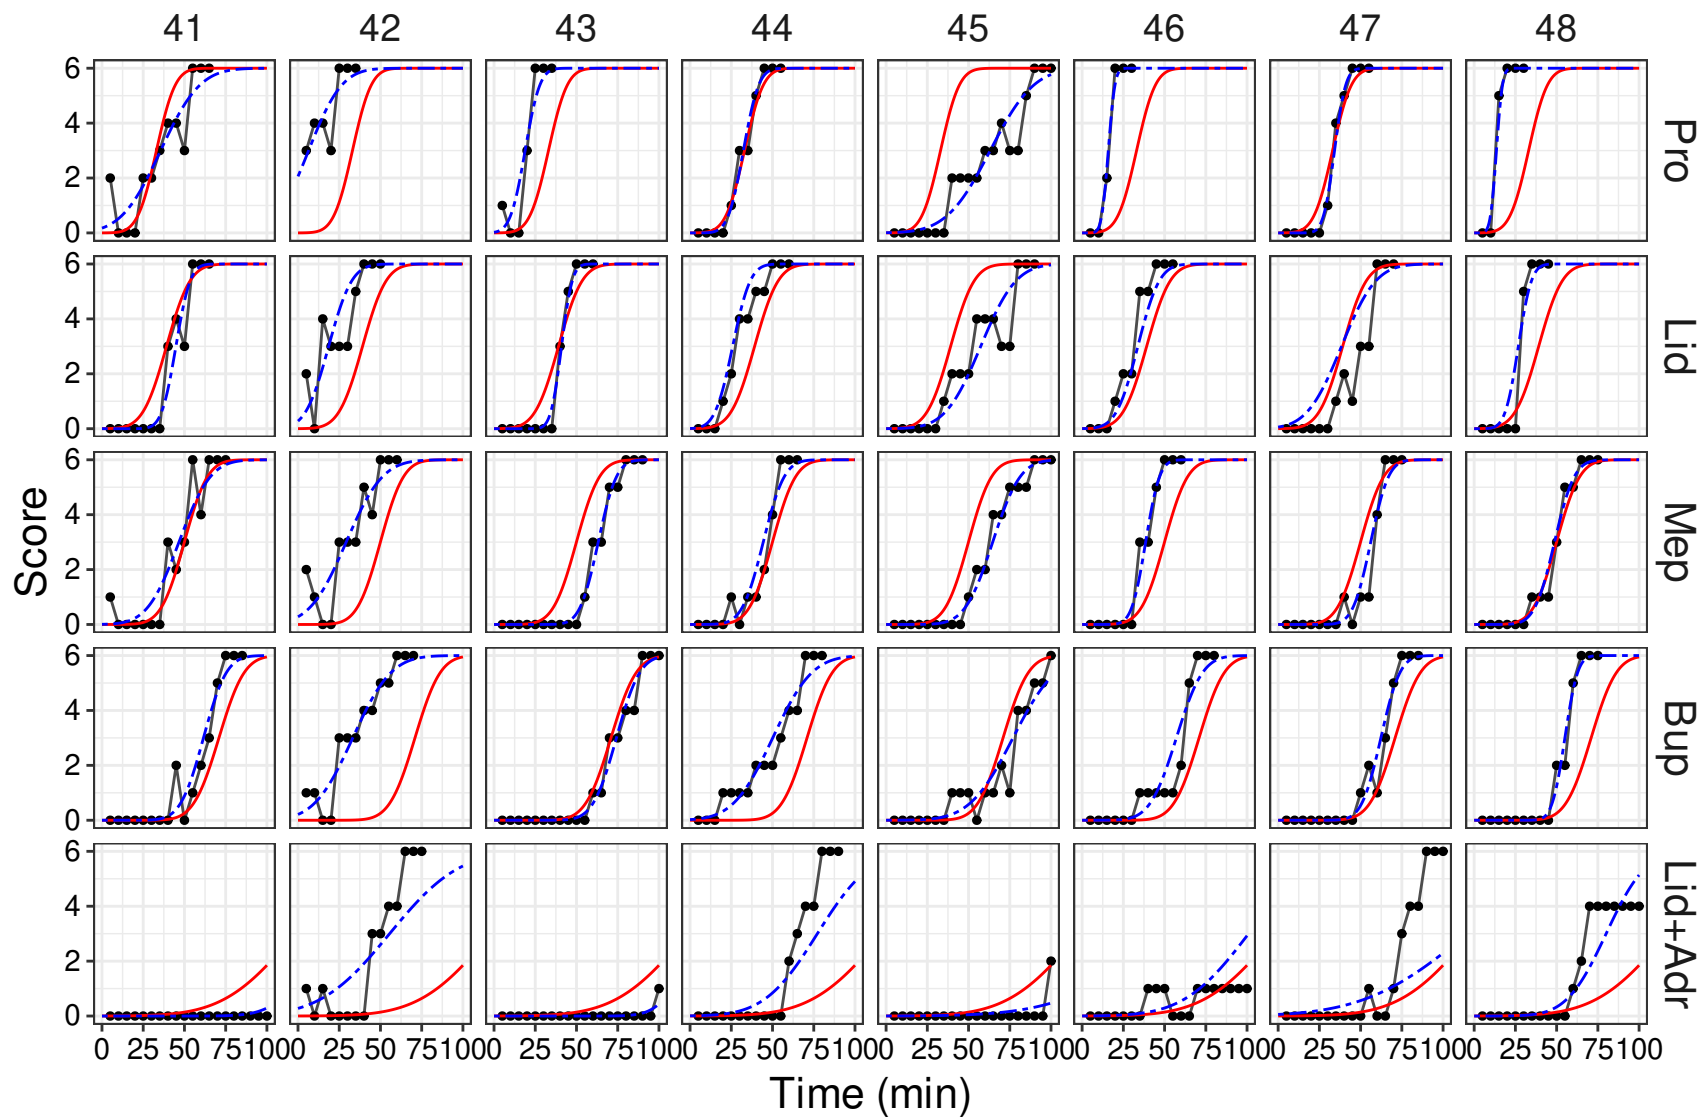

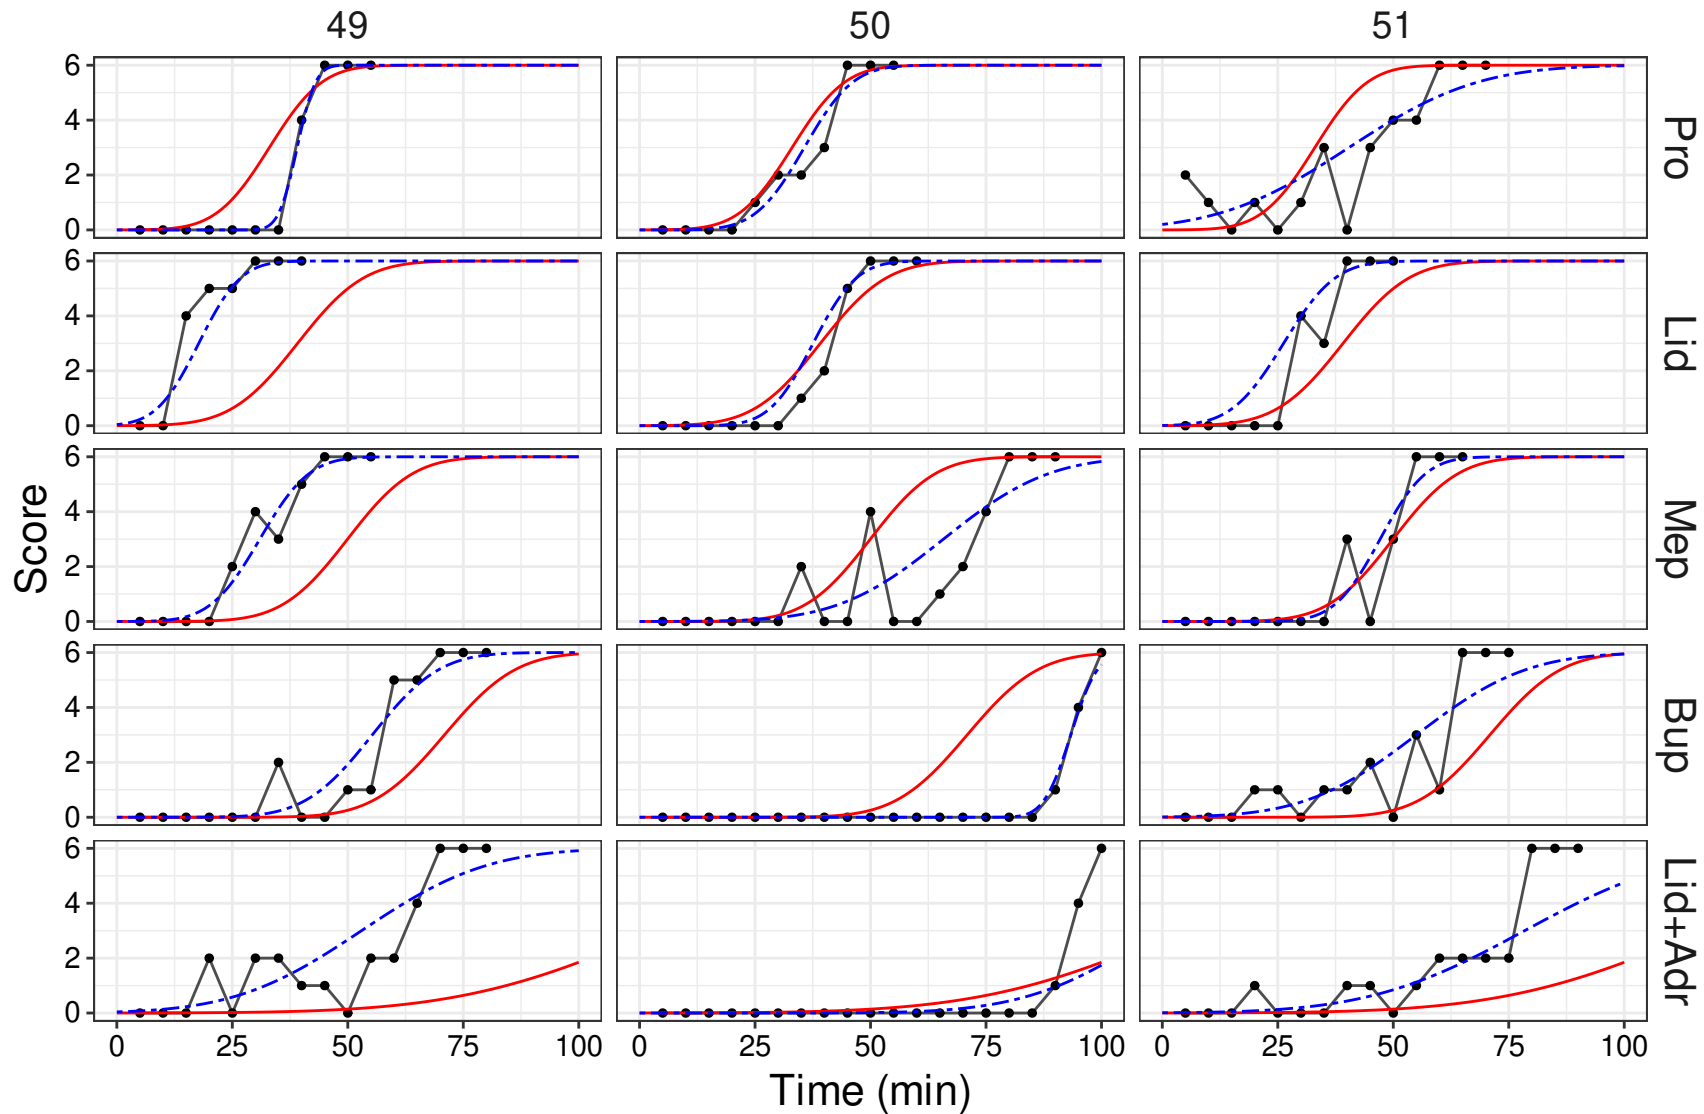

Supplement: s1 [file s1]

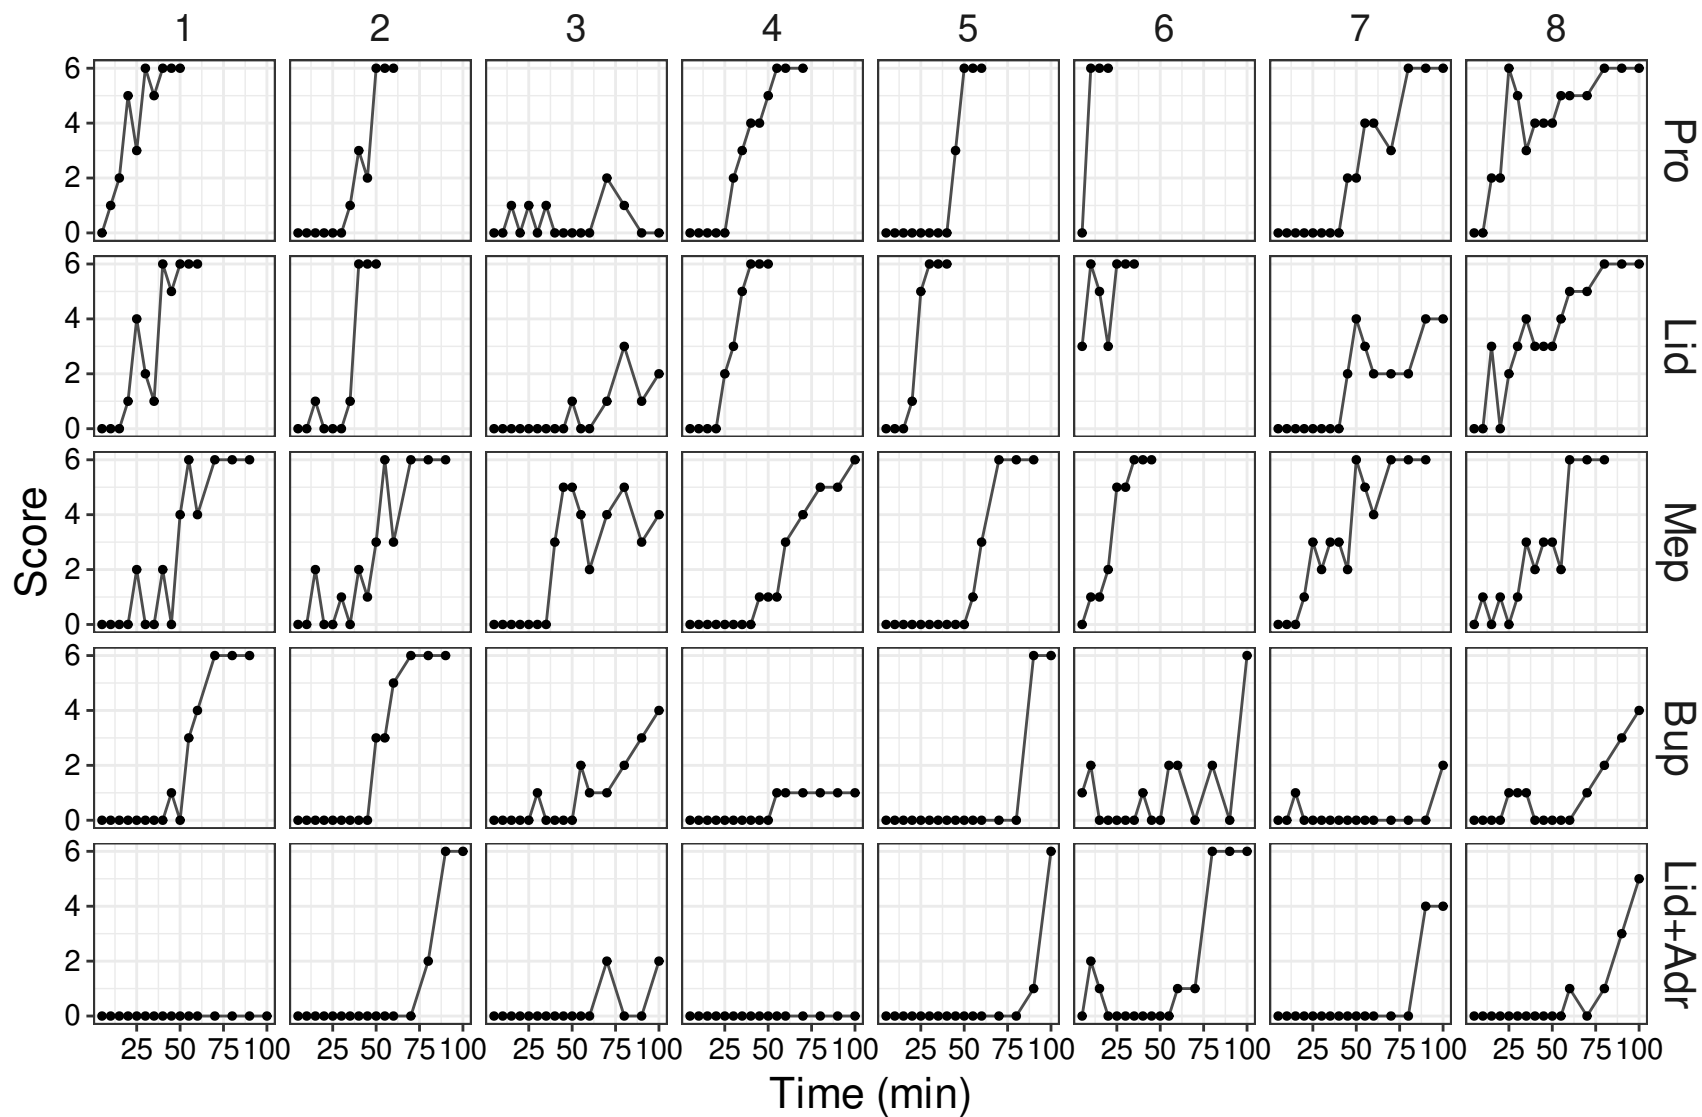

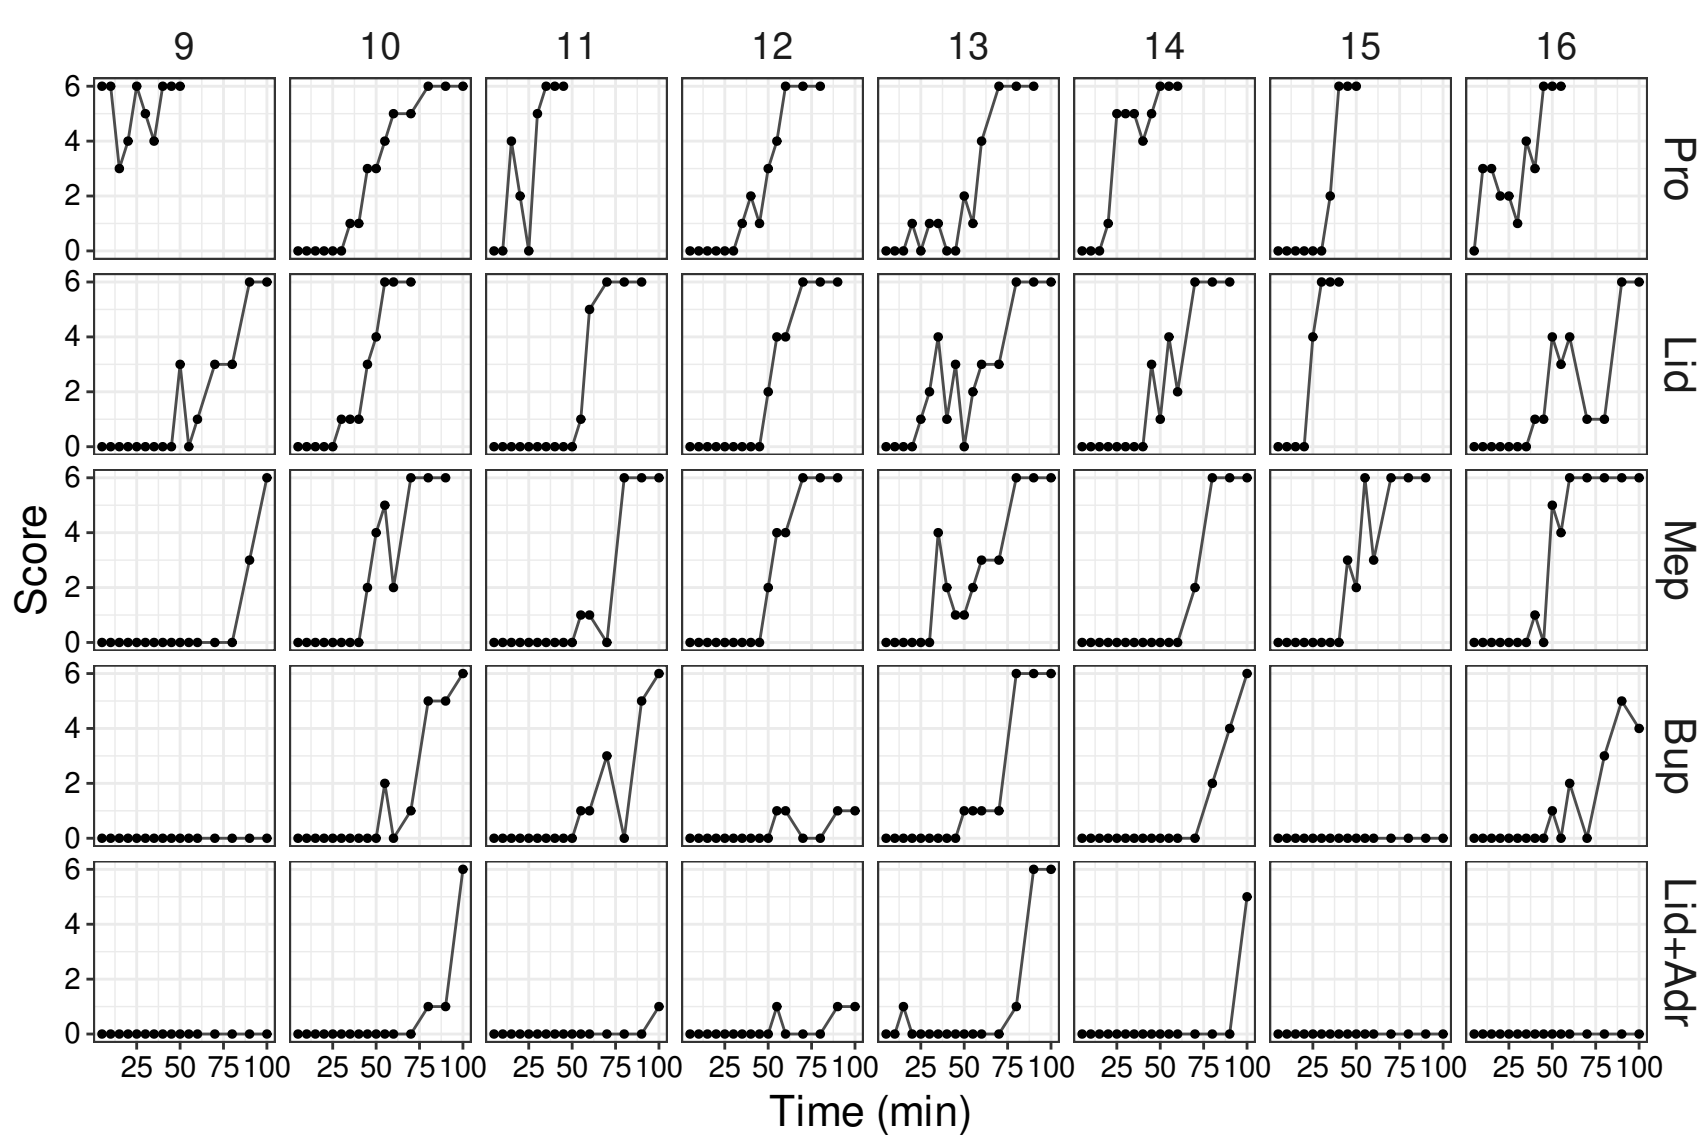

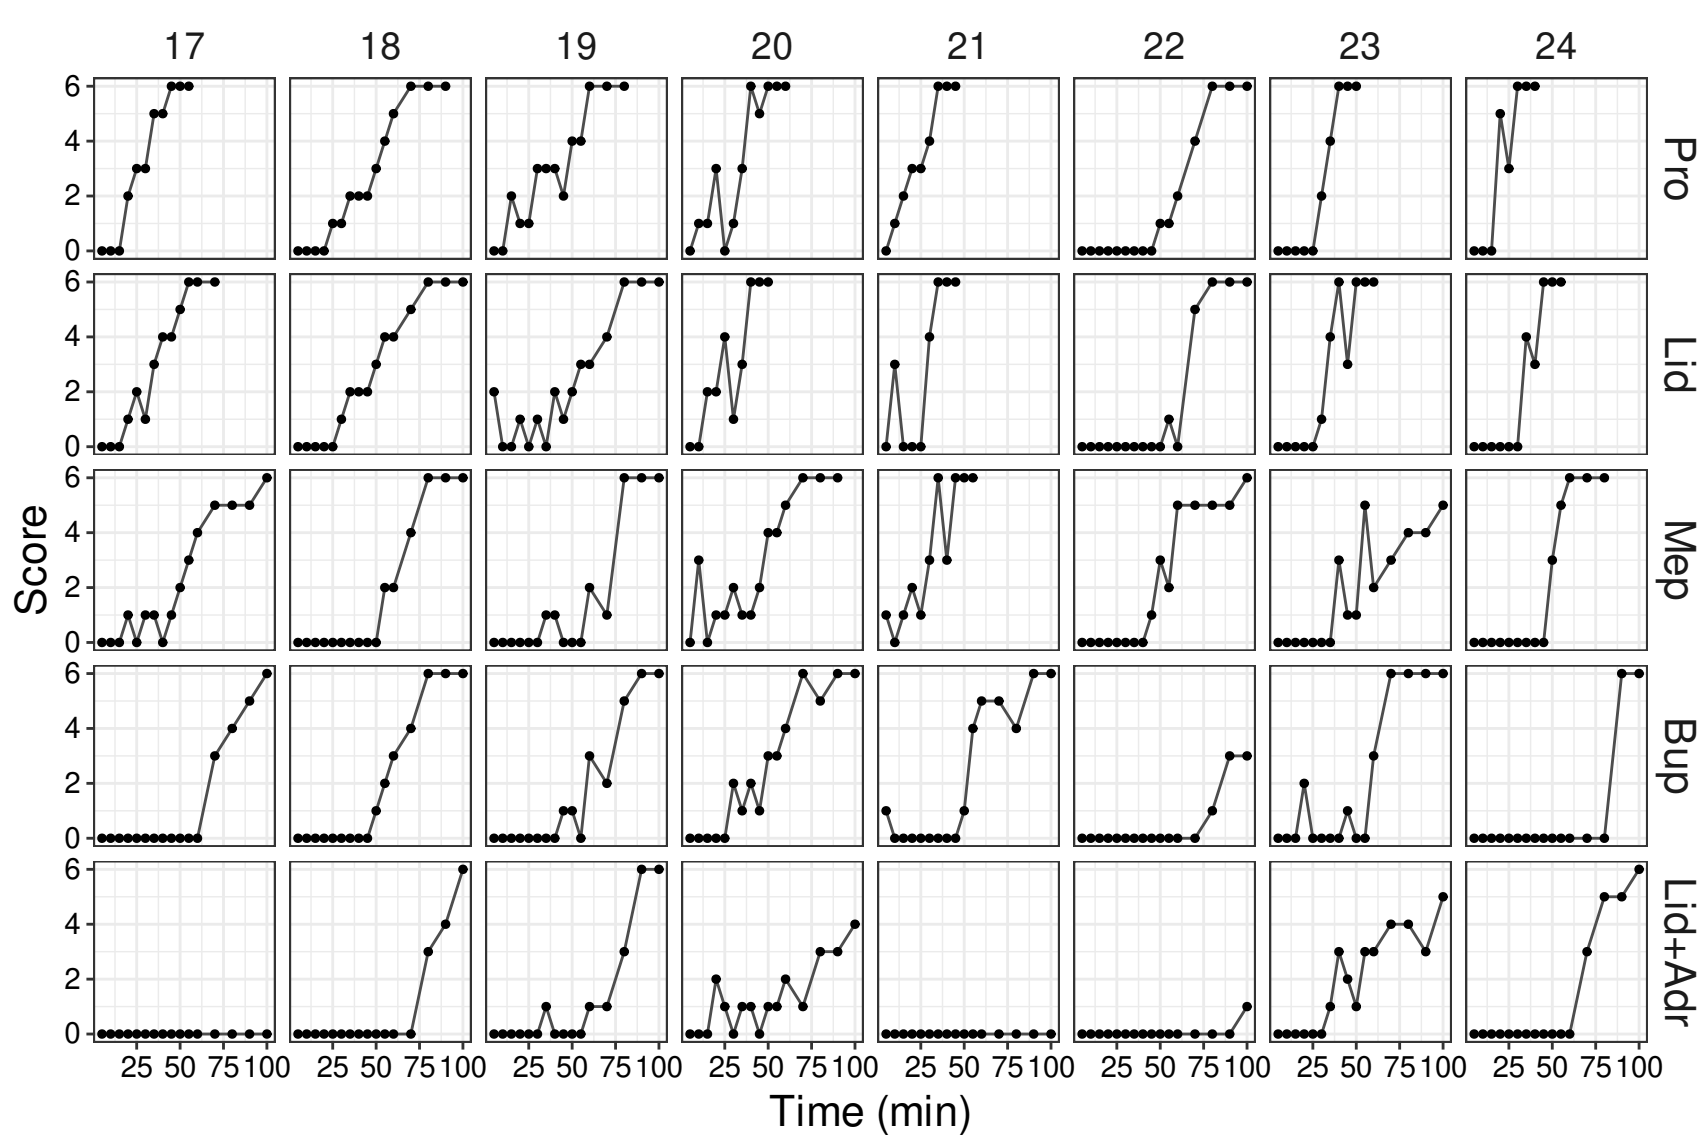

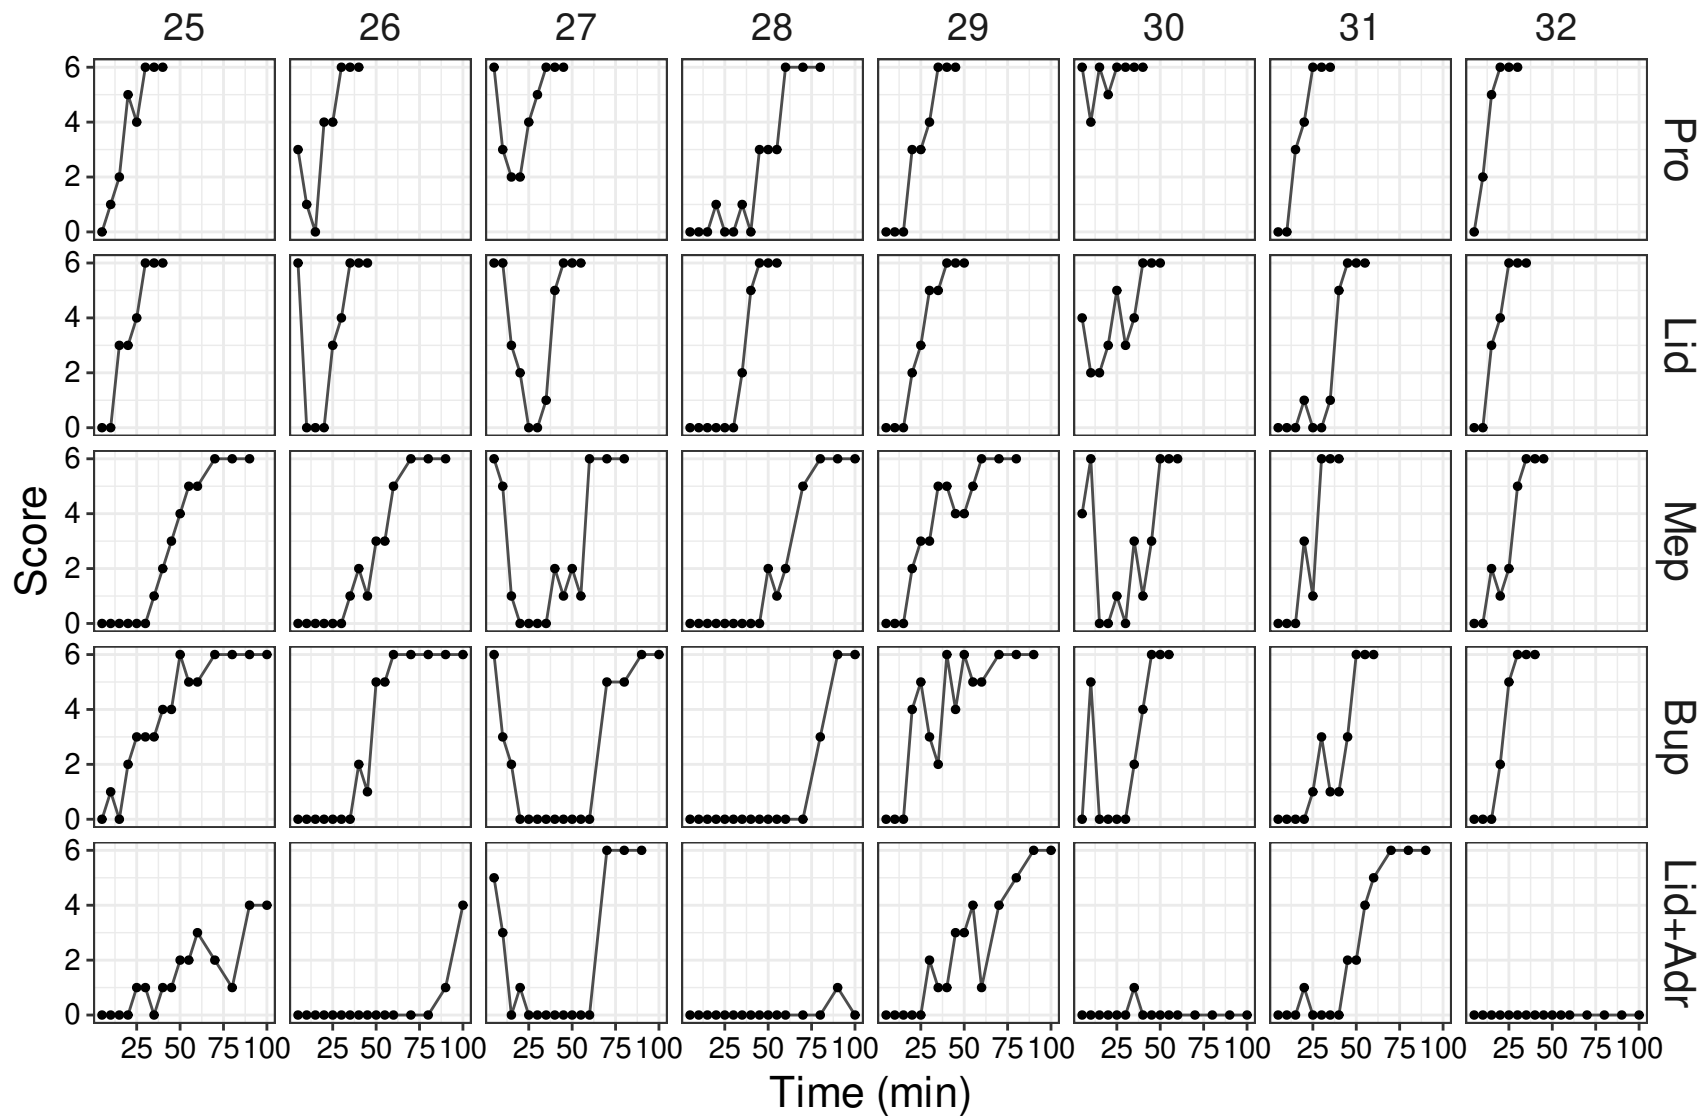

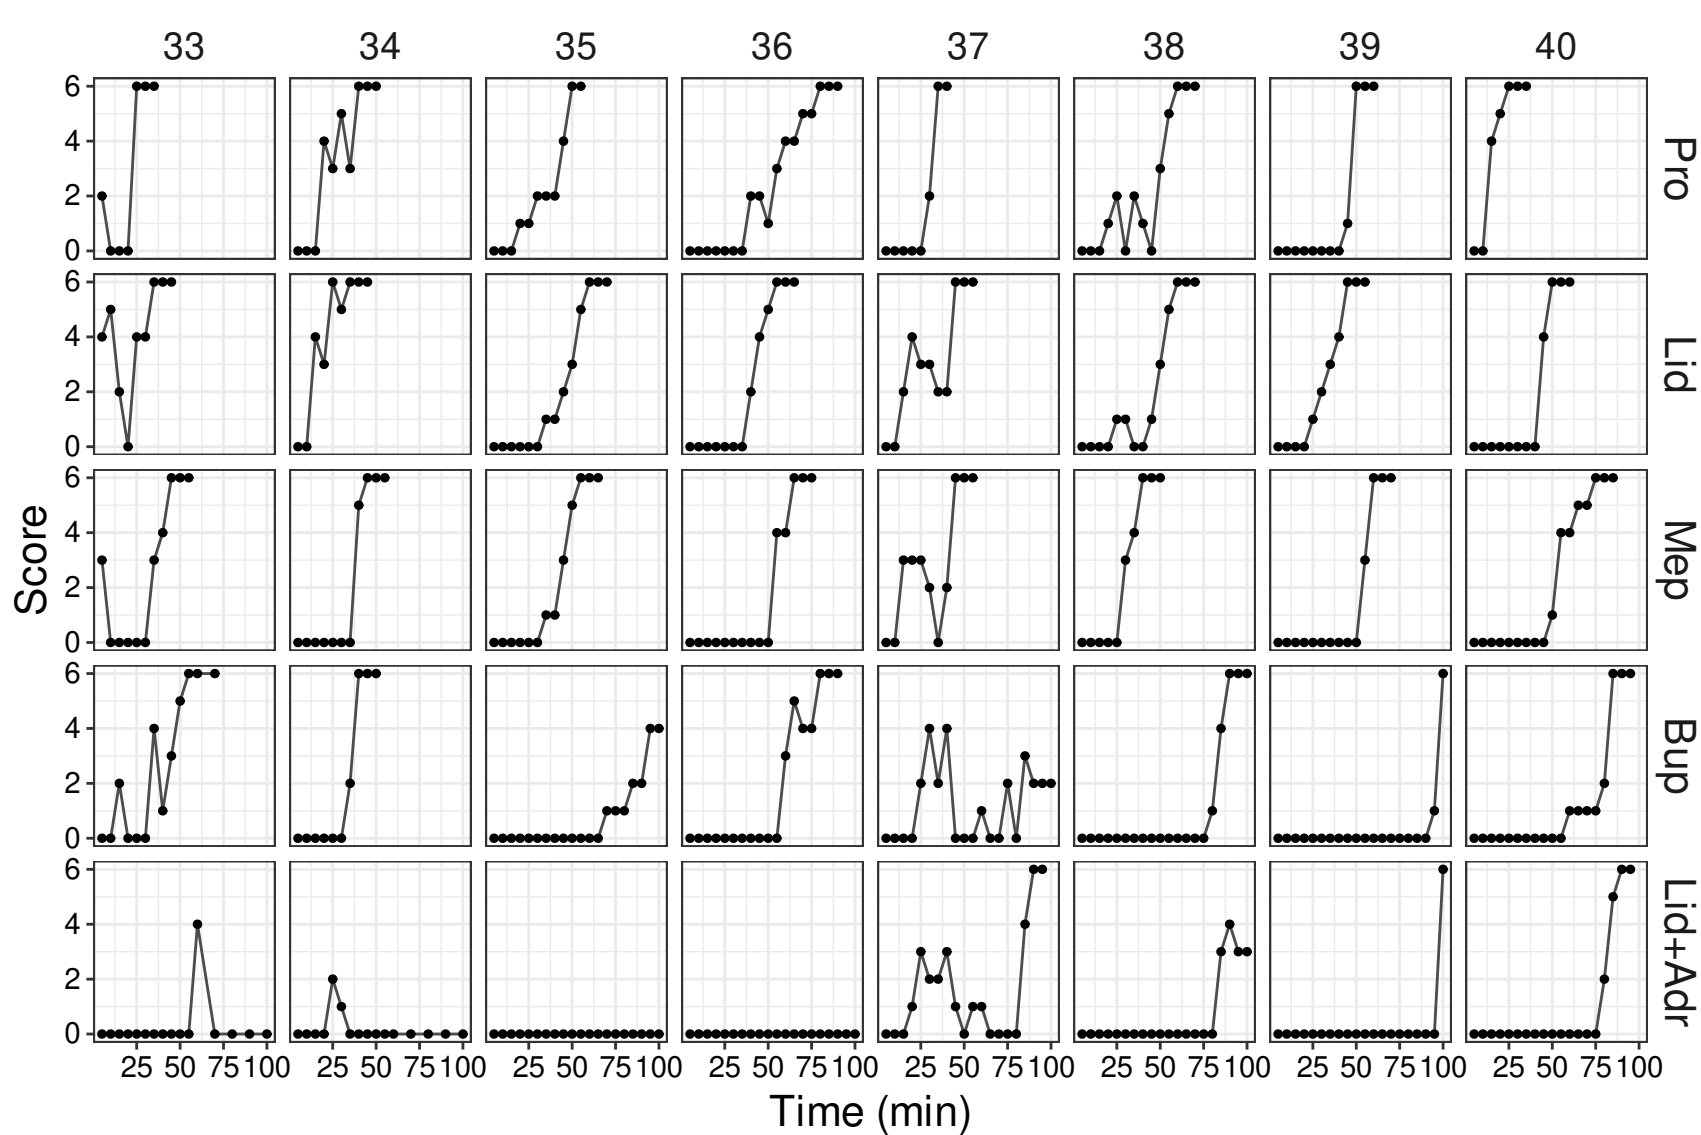

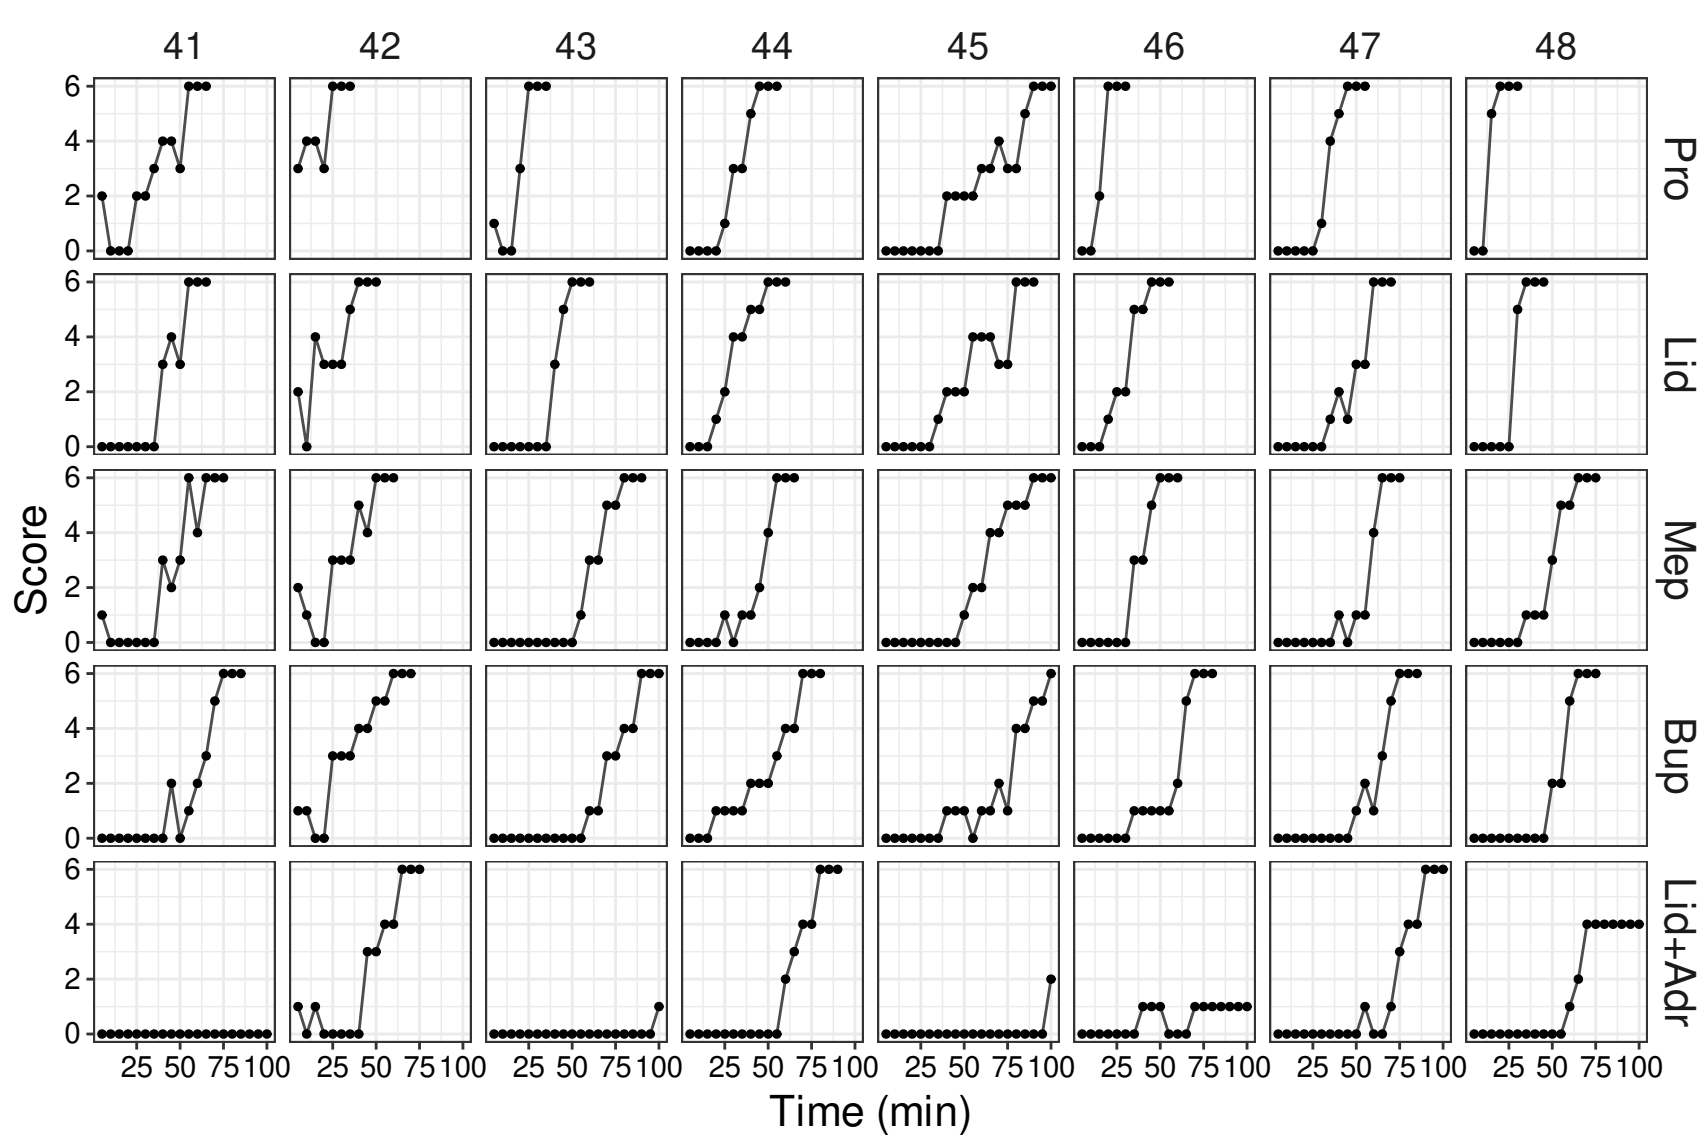

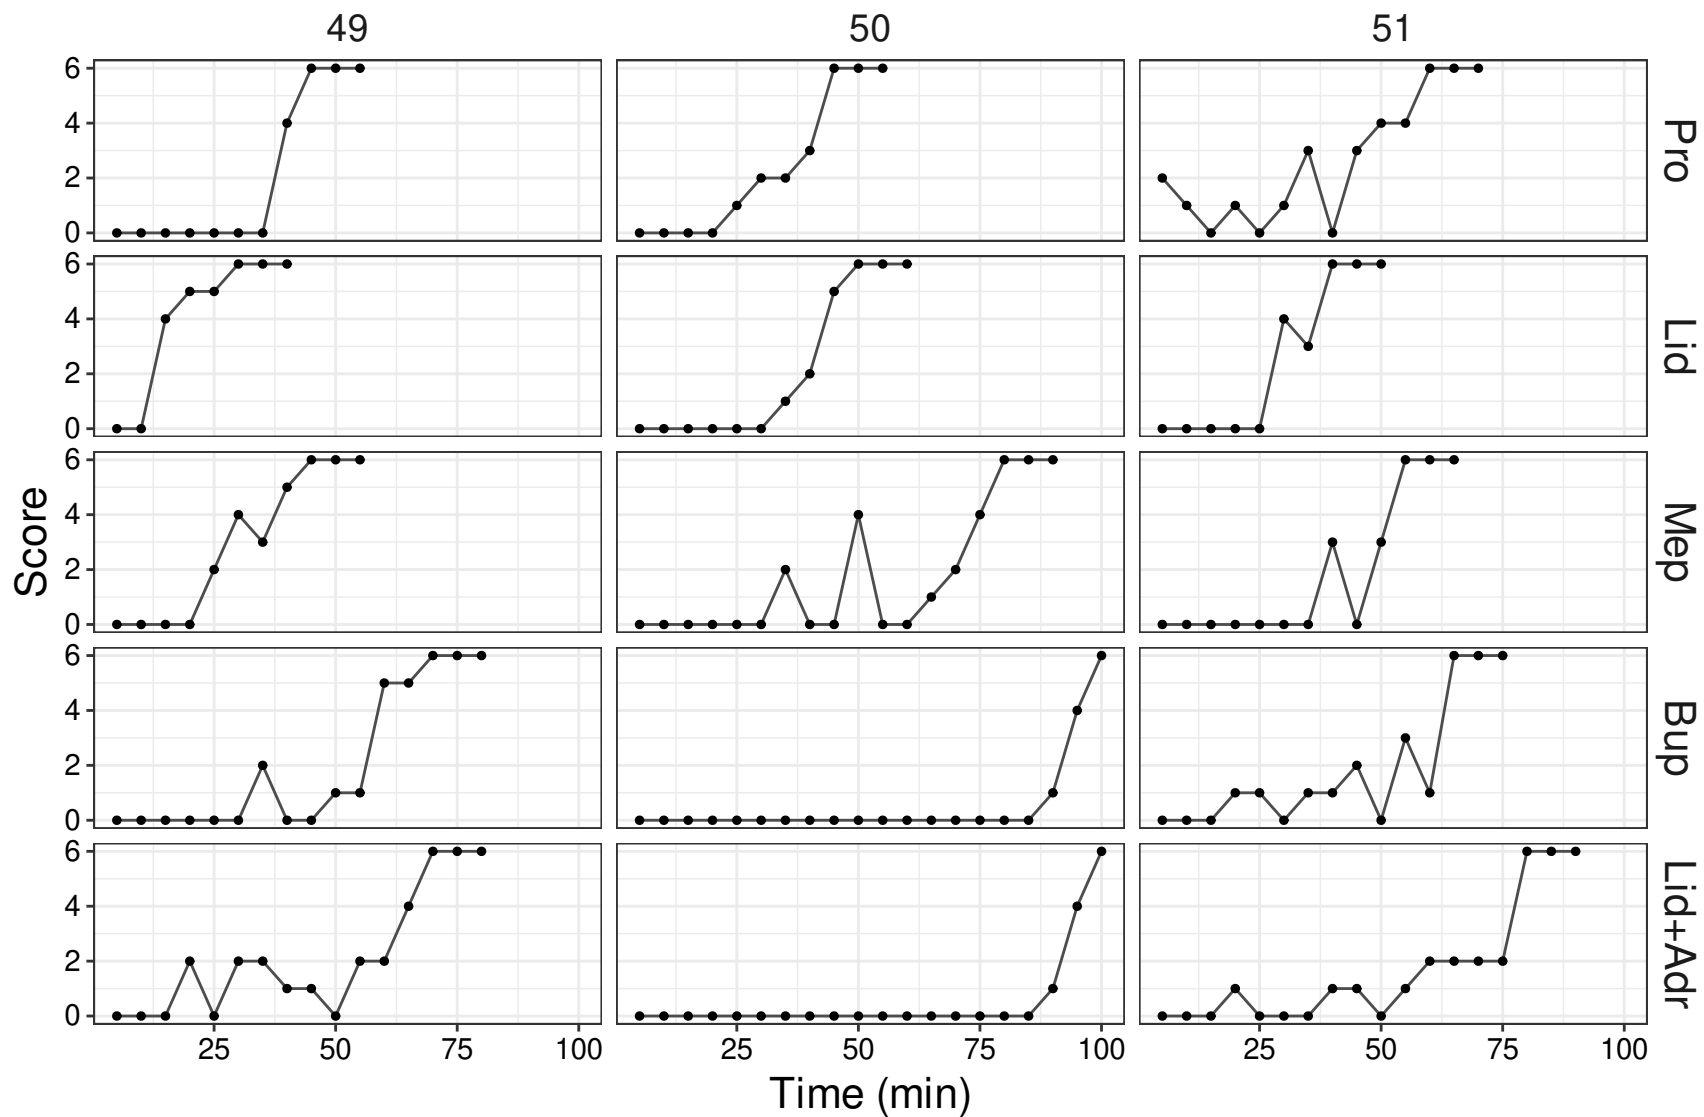

Supplement: s1 [file s1]

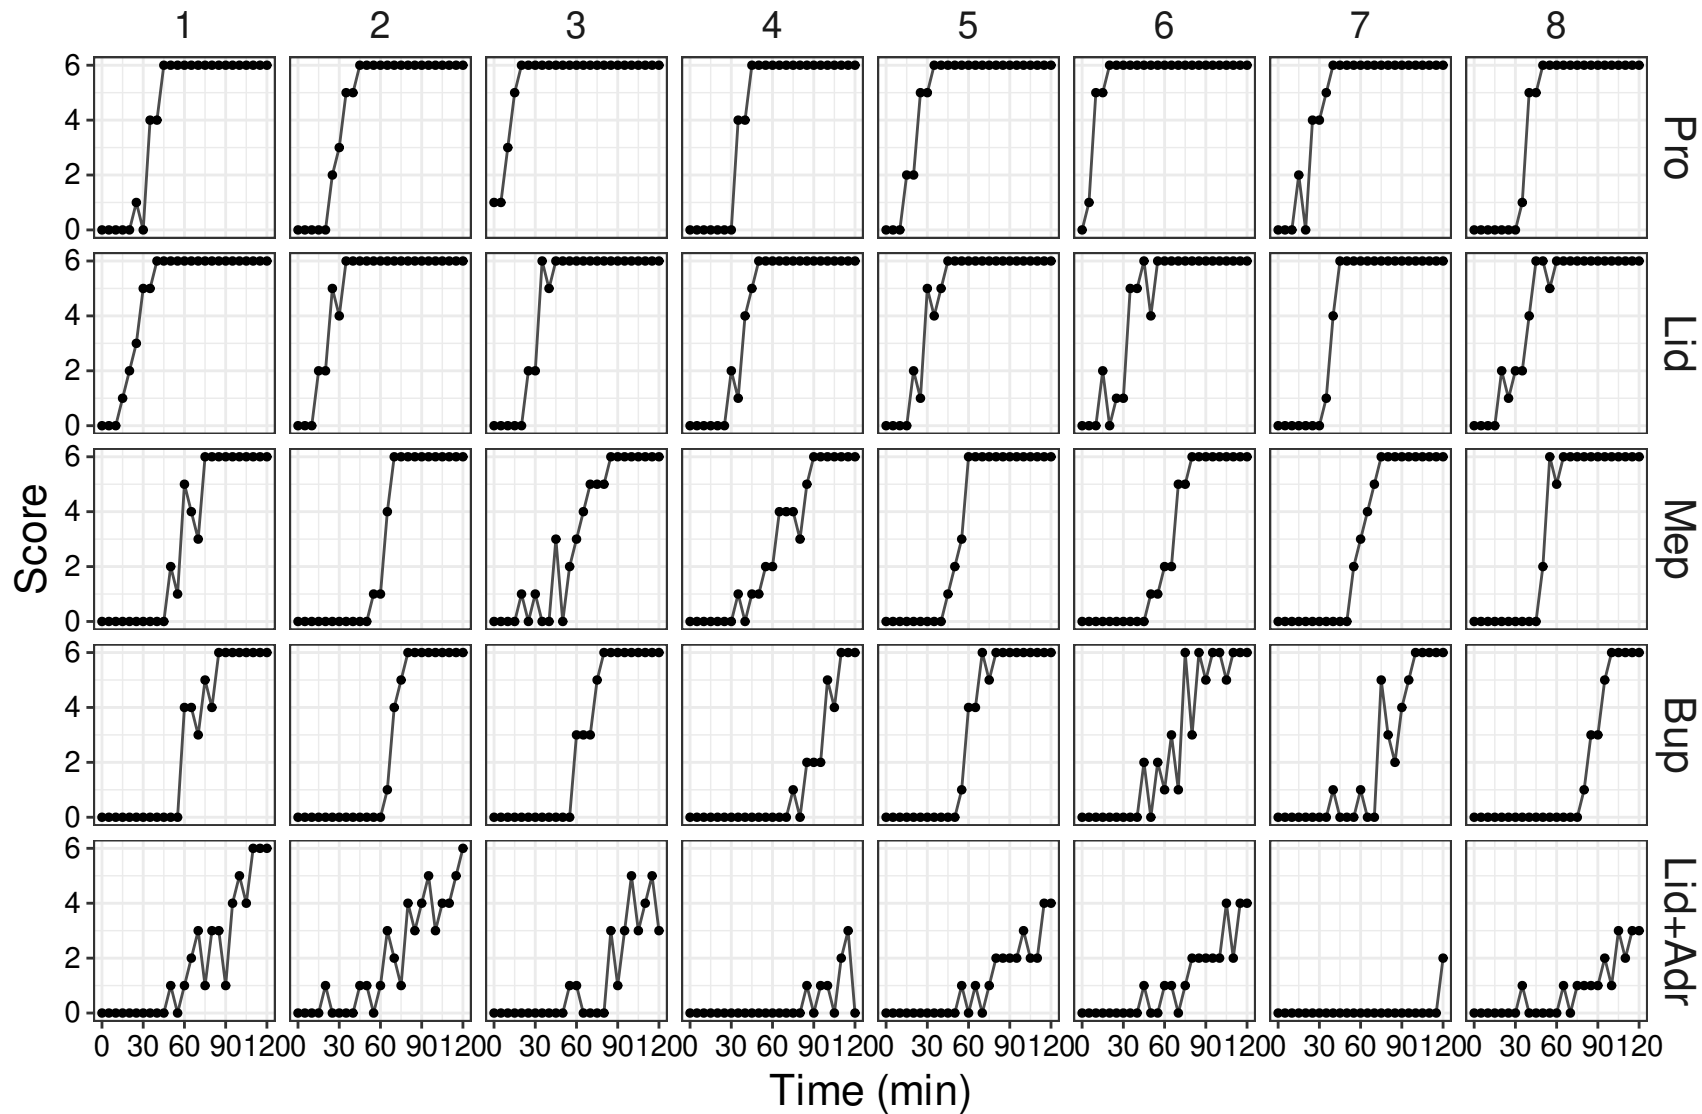

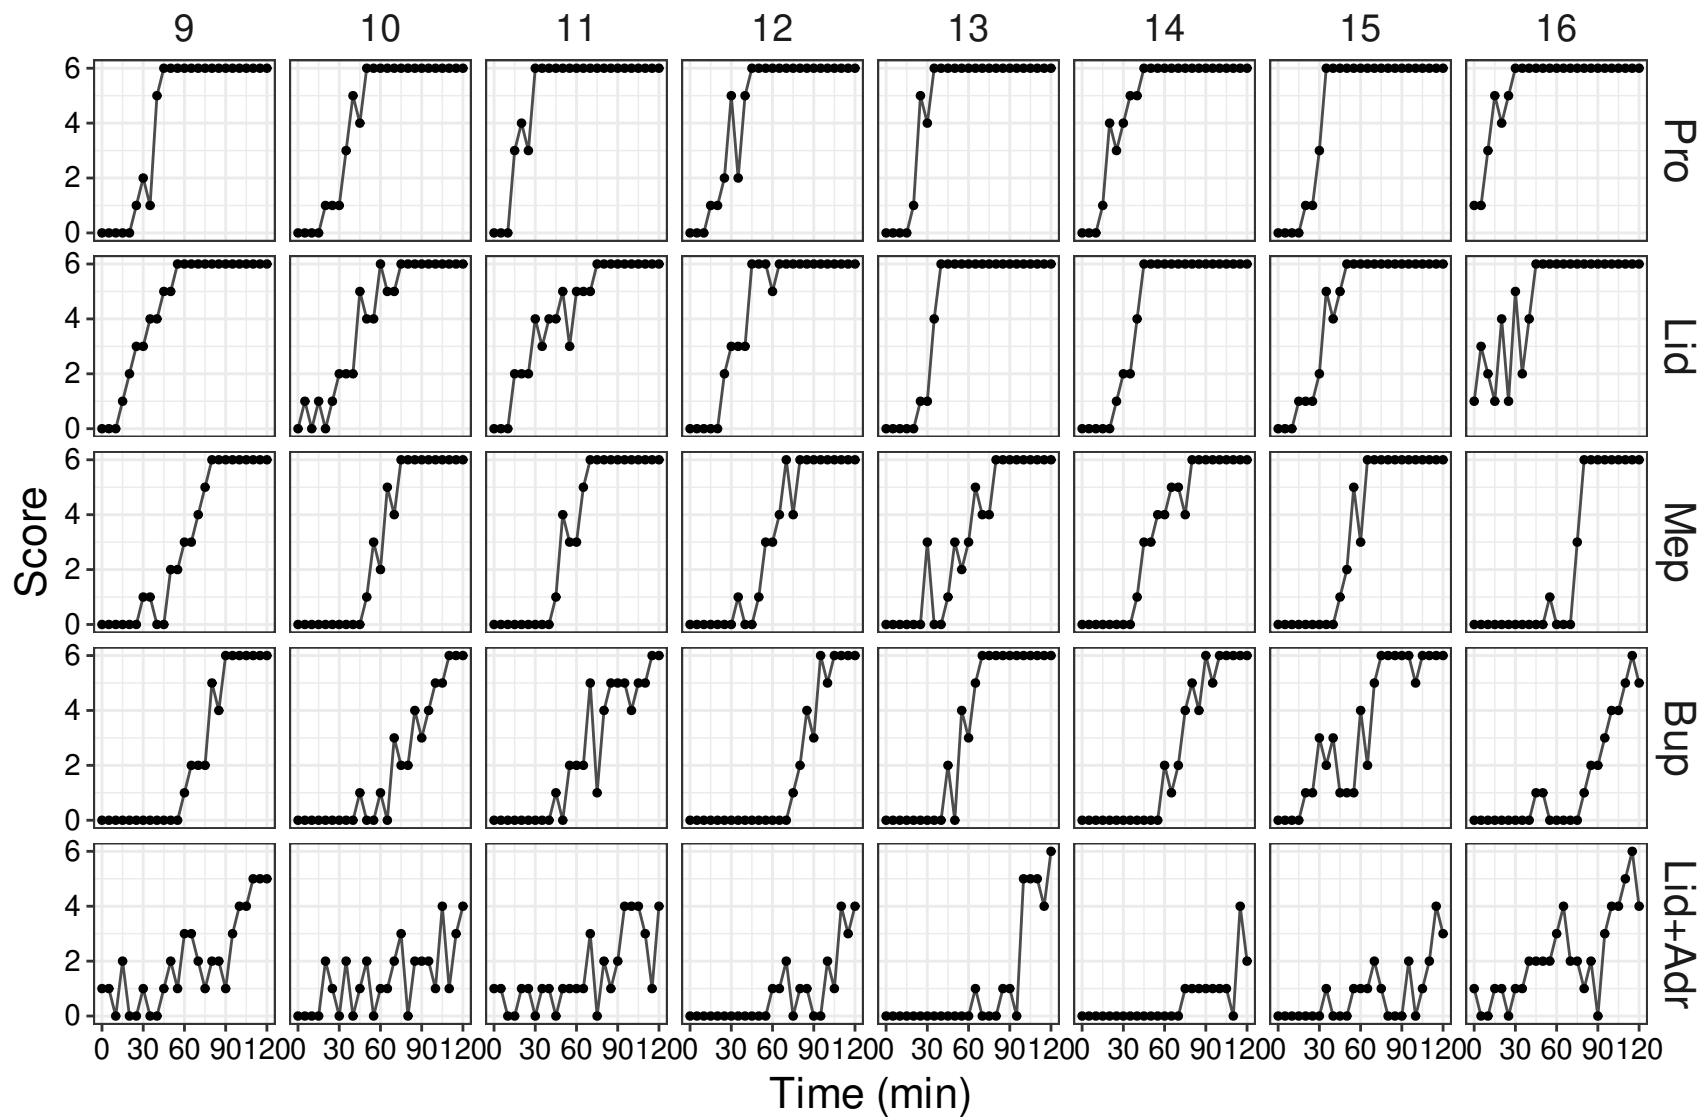

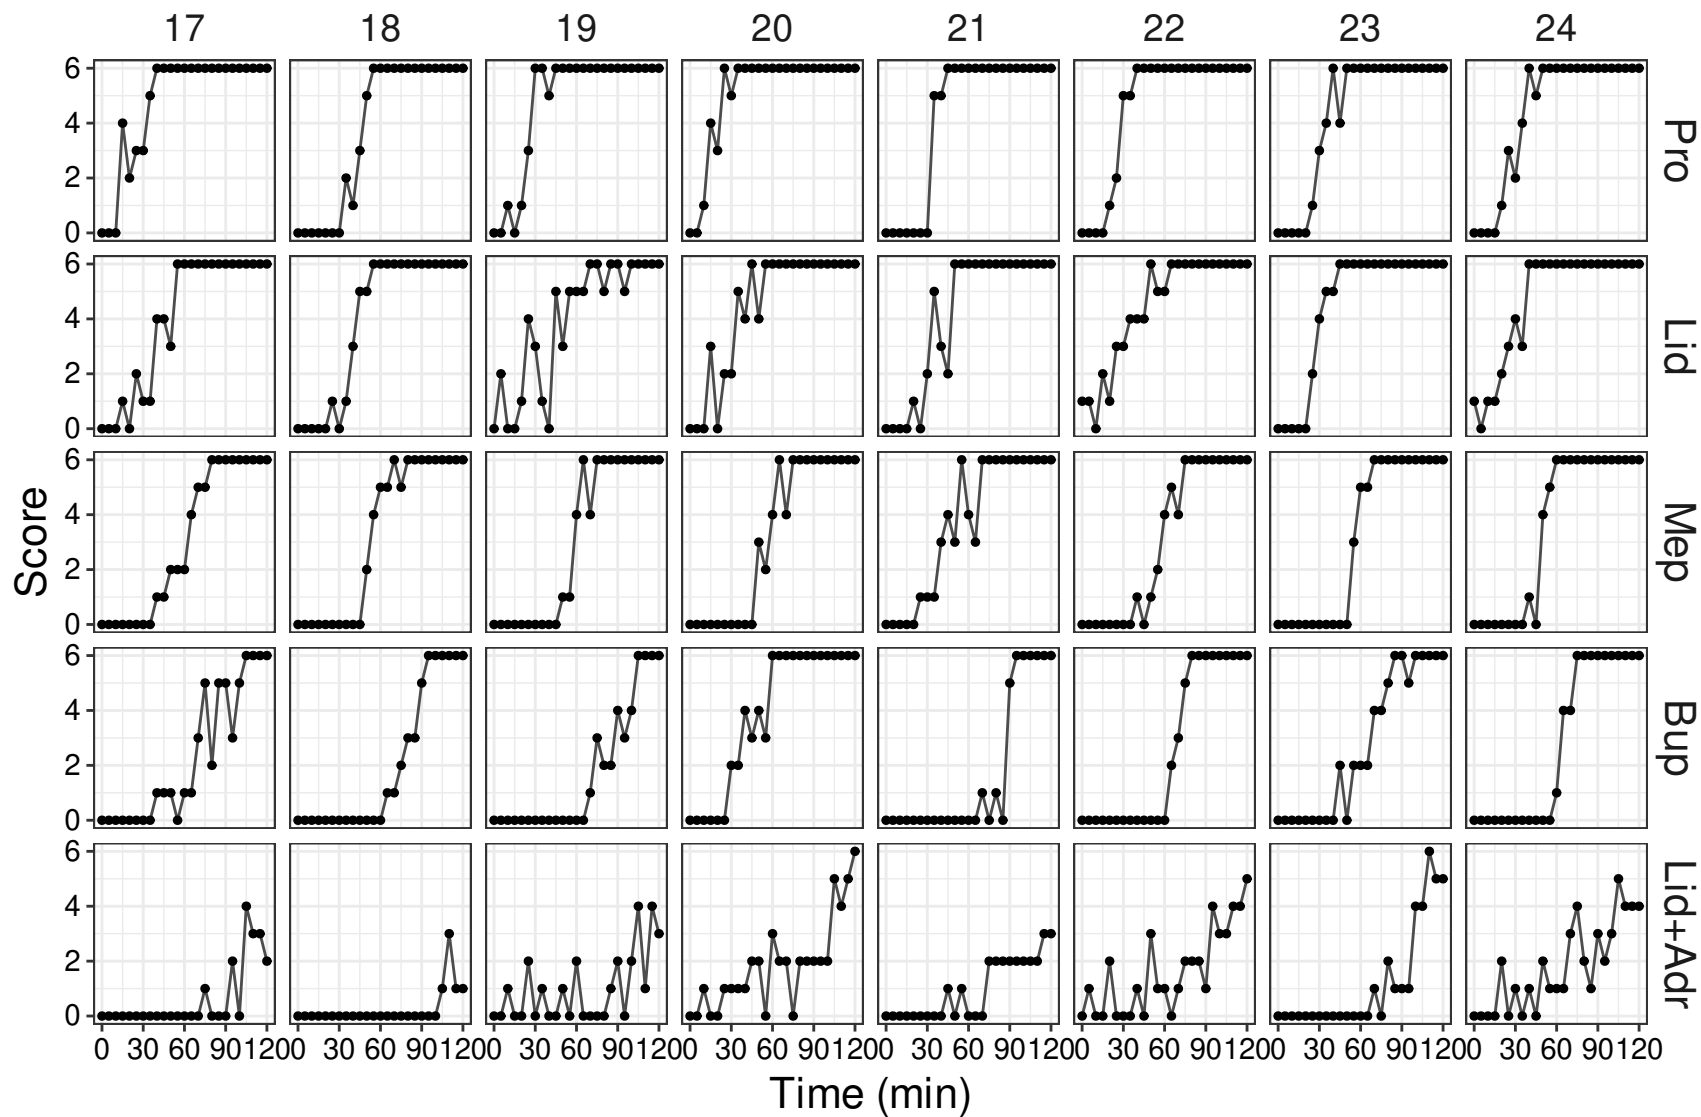

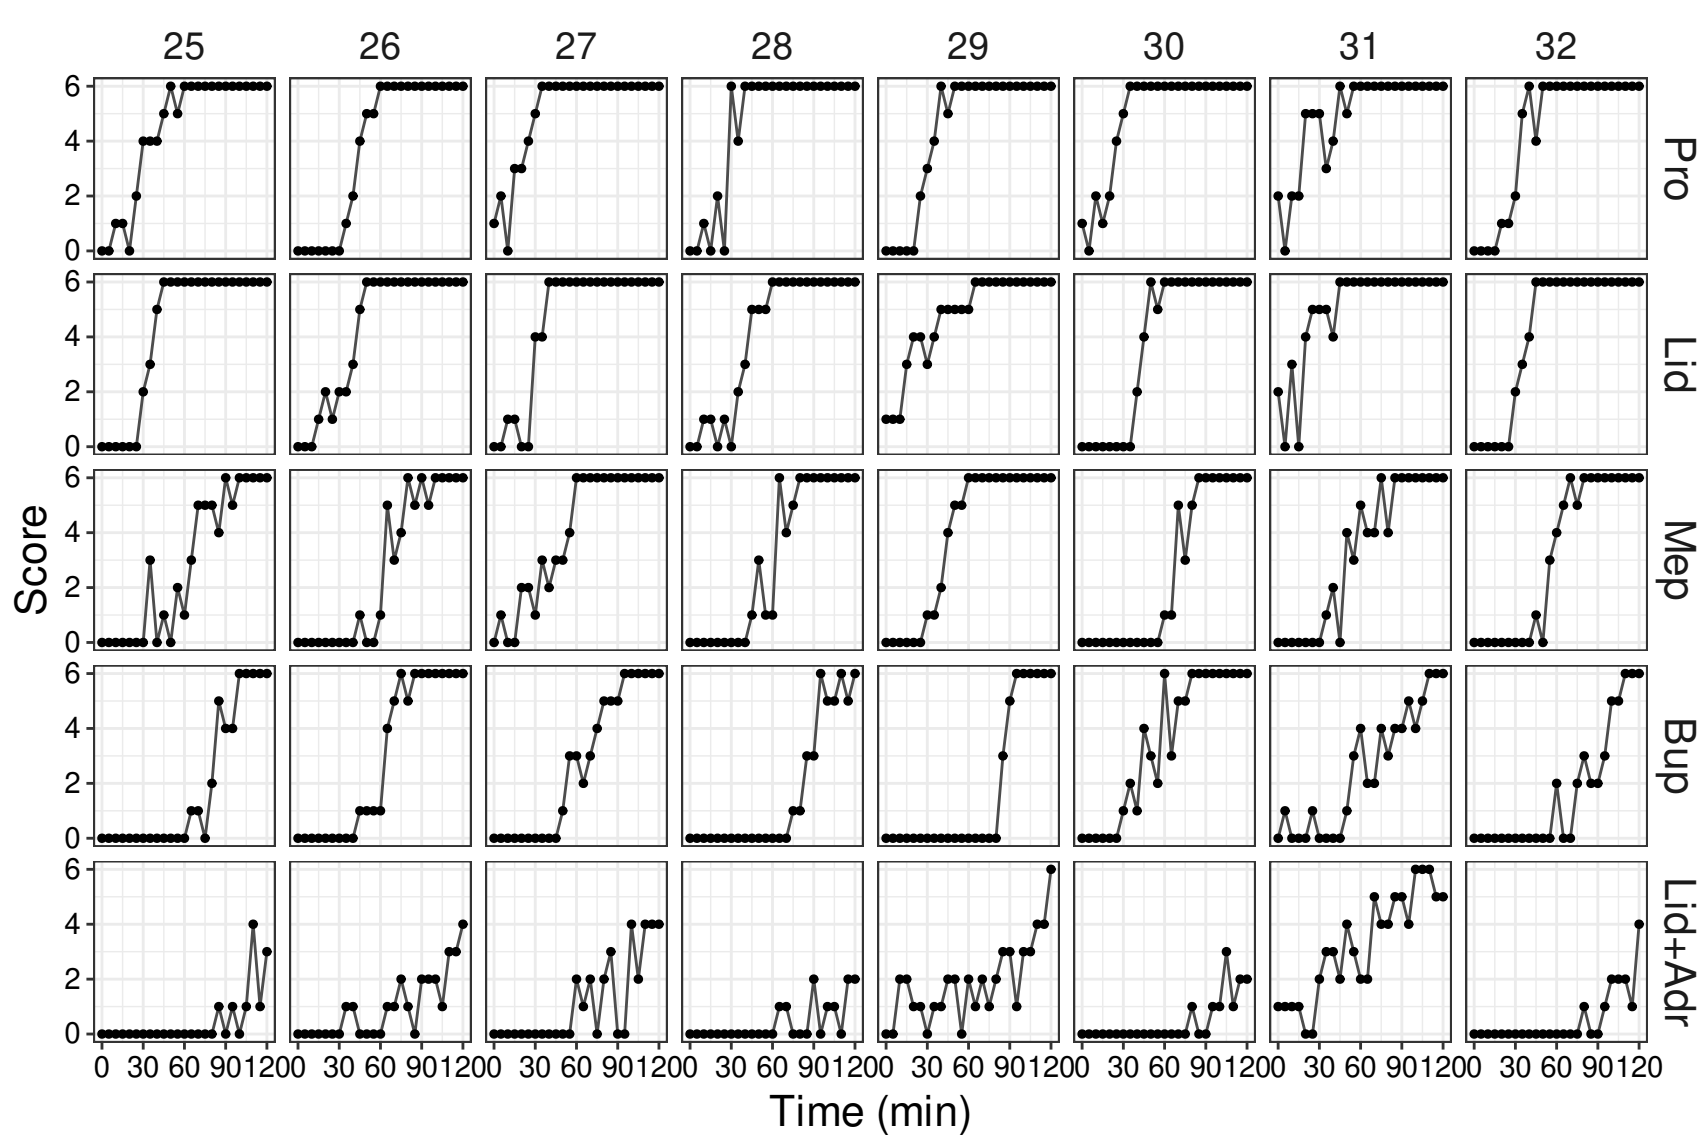

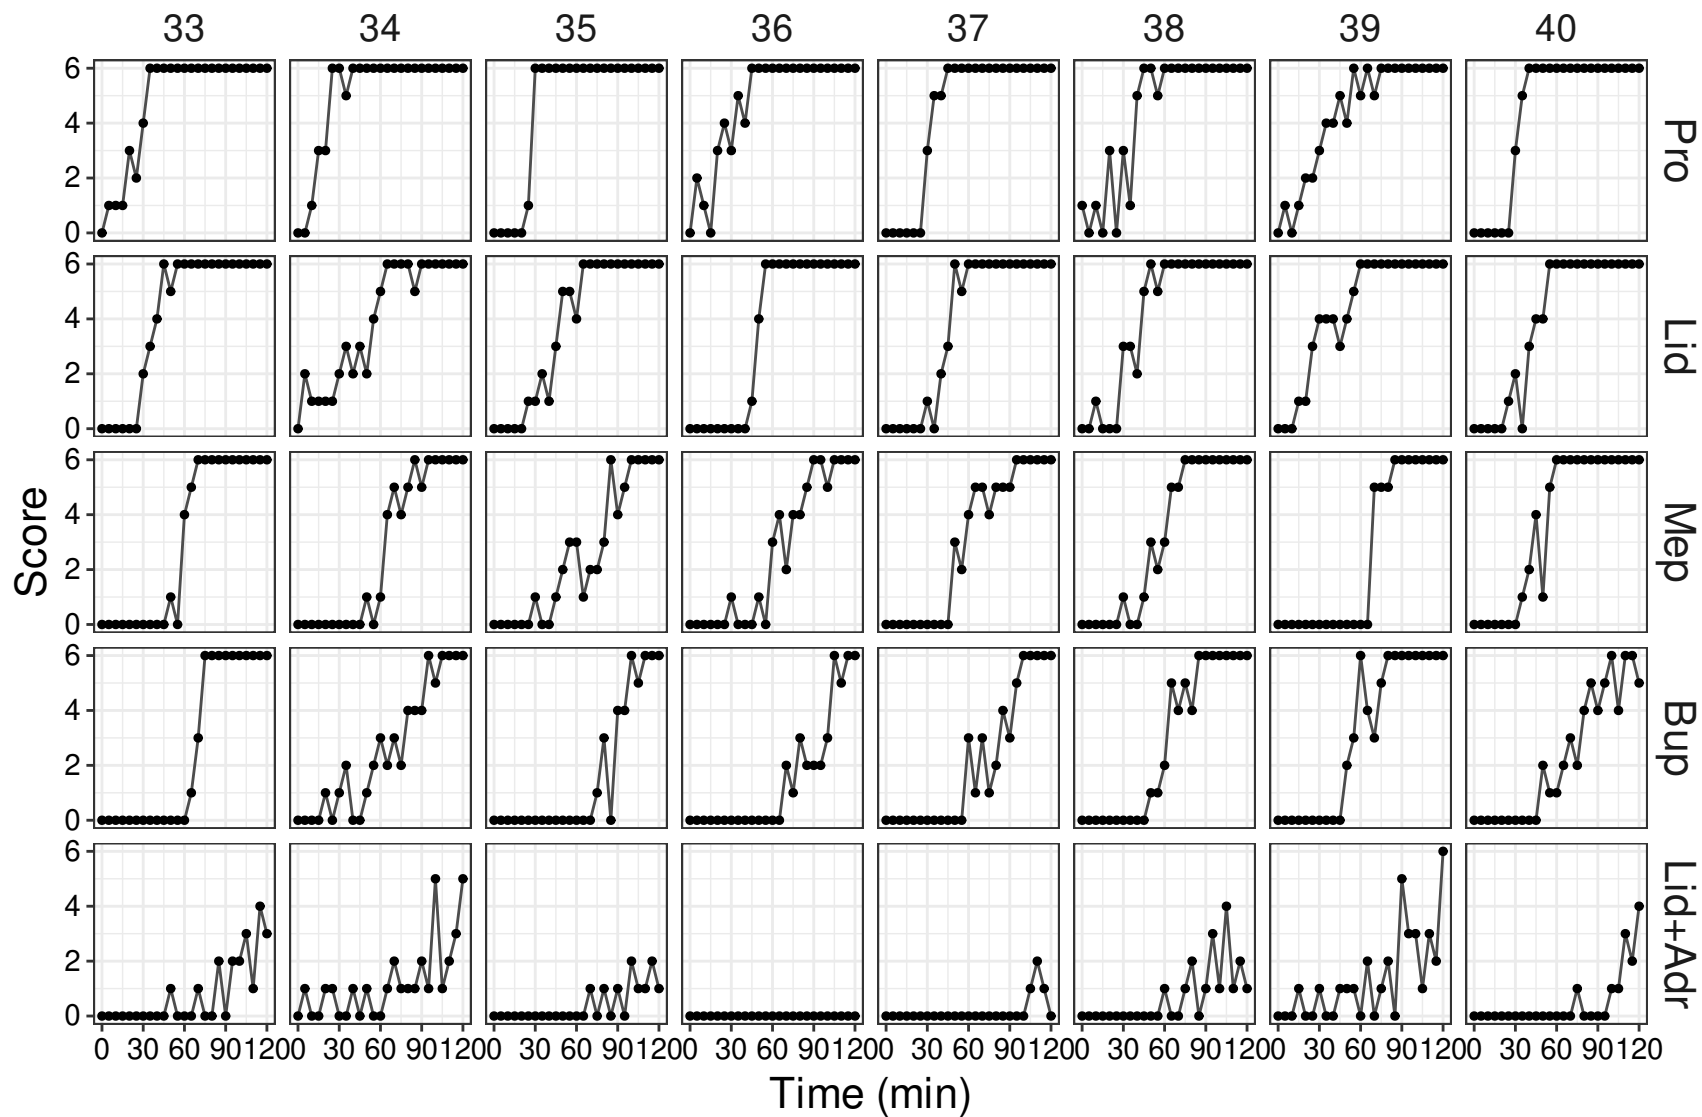

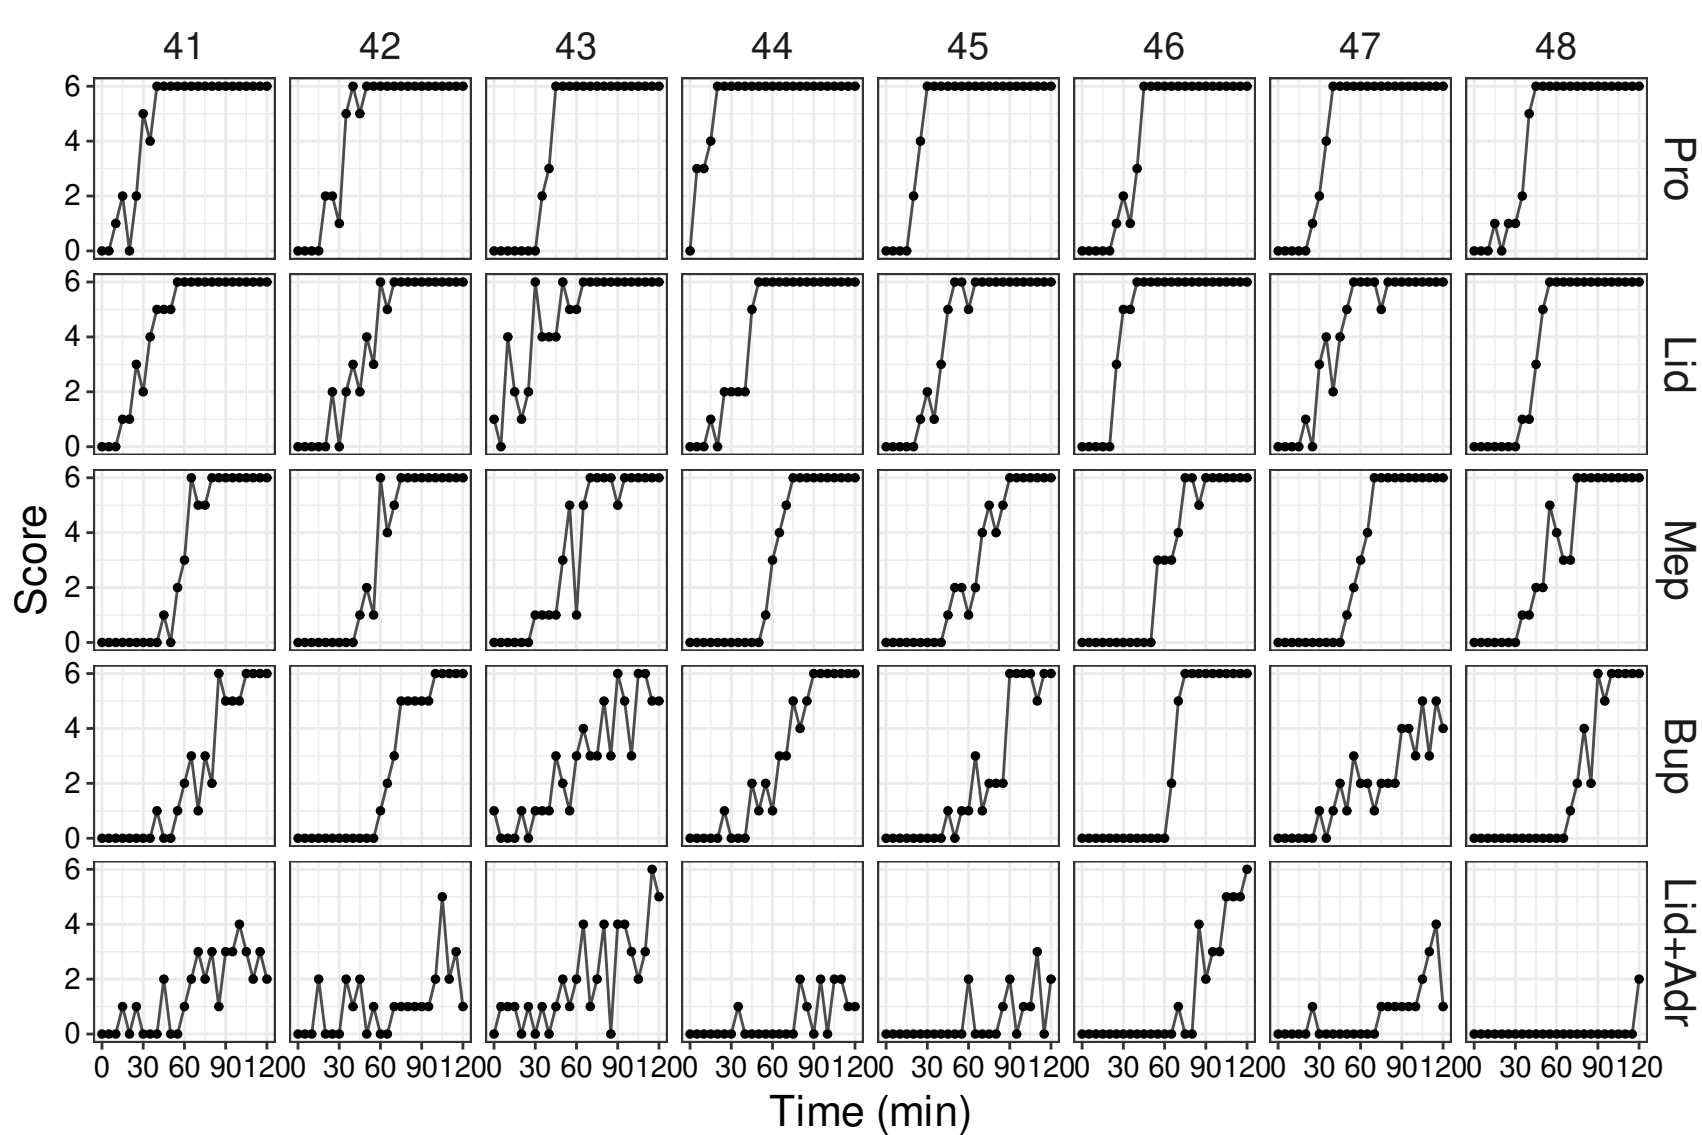

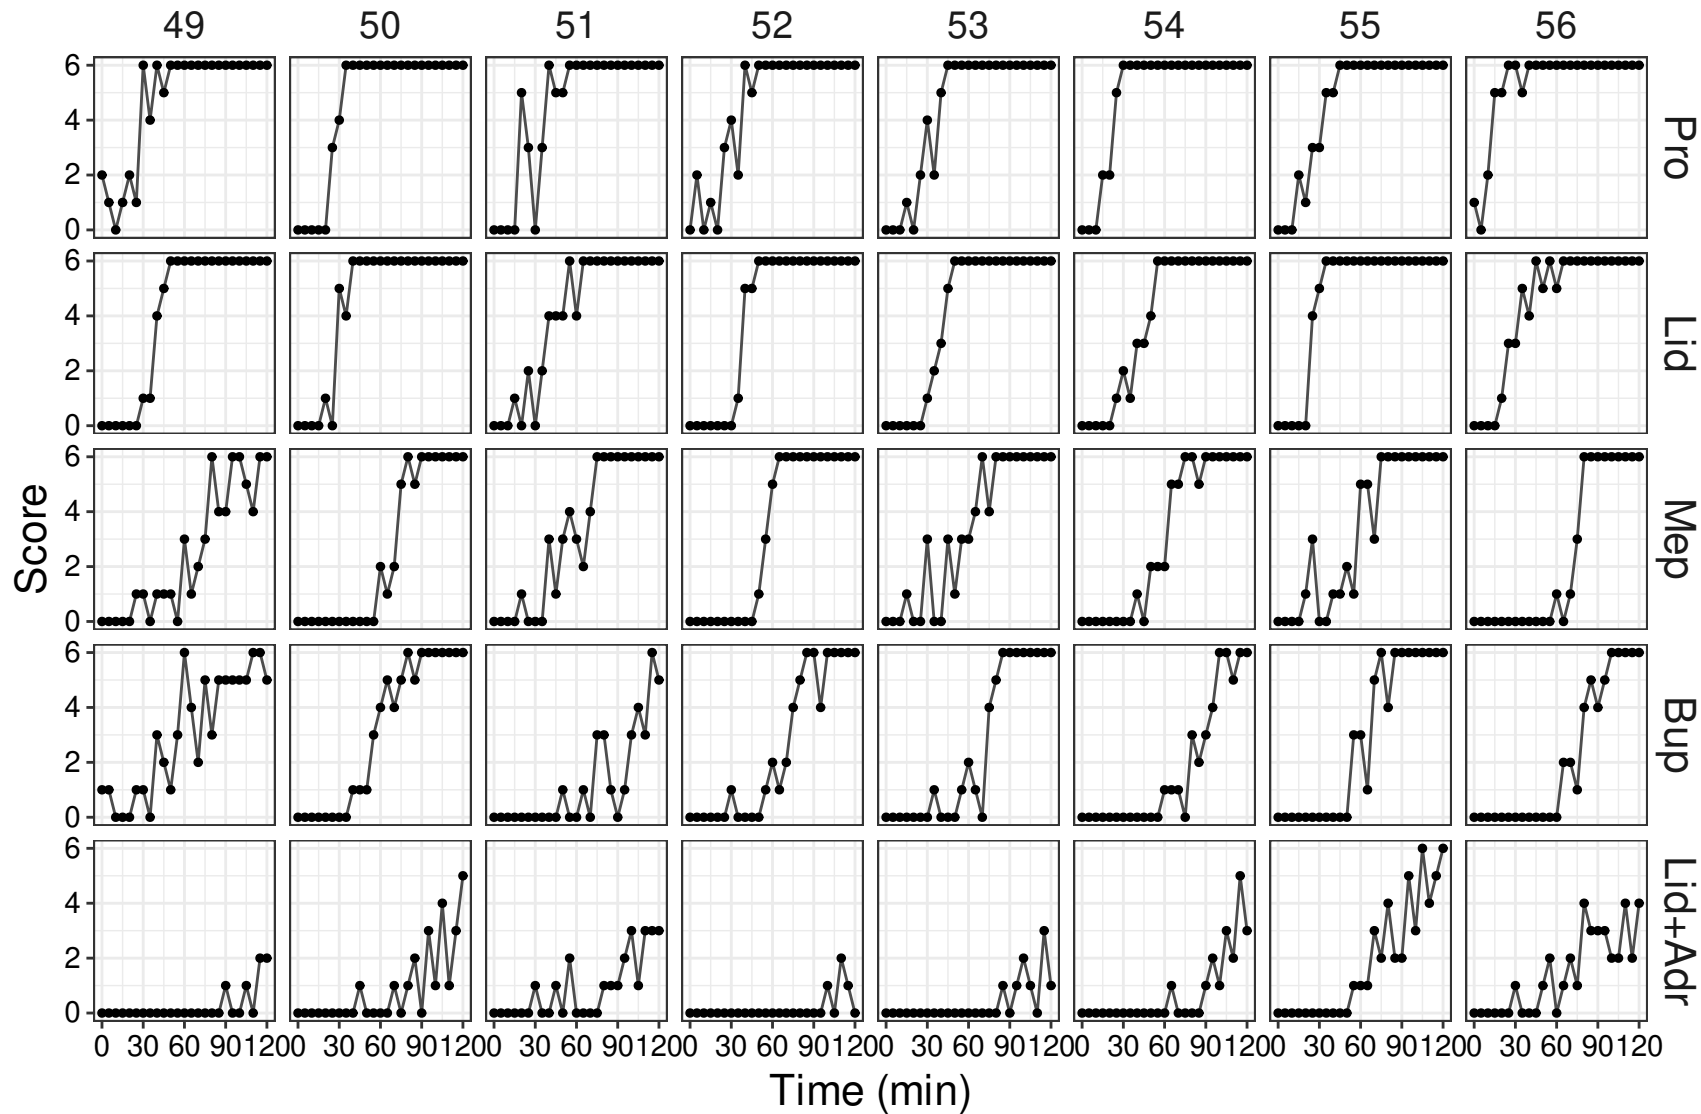

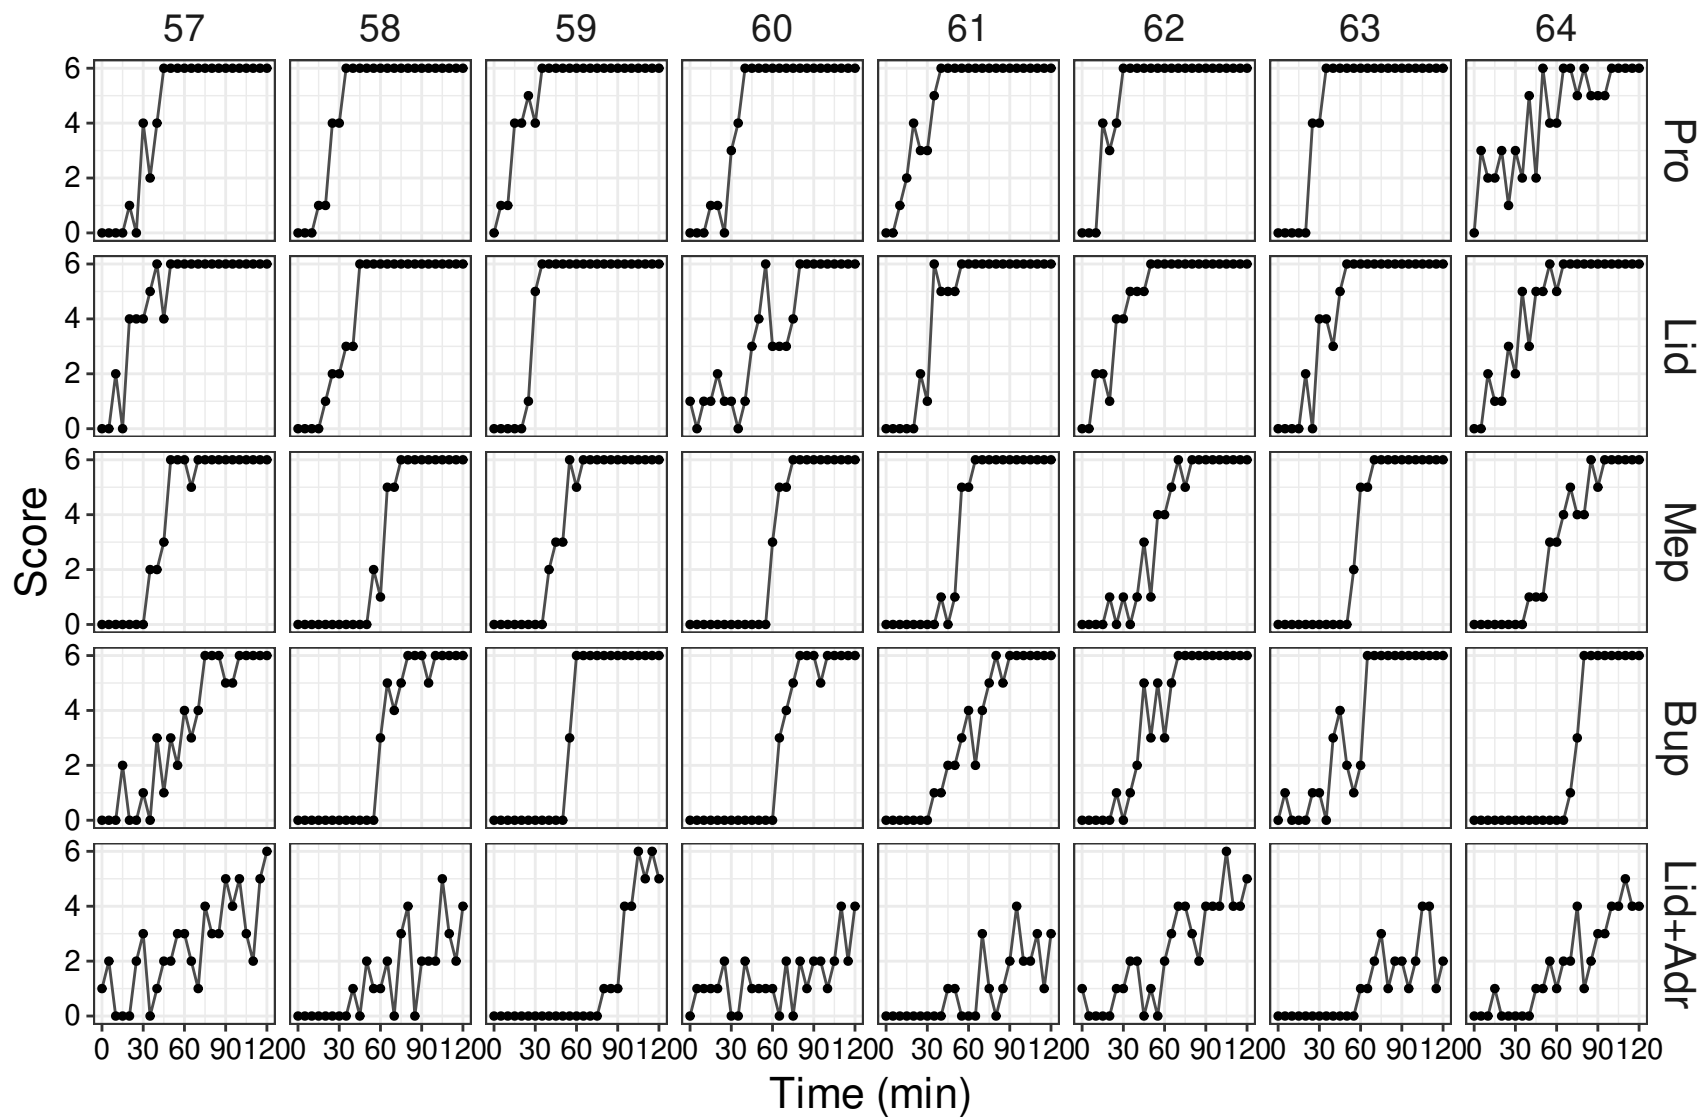



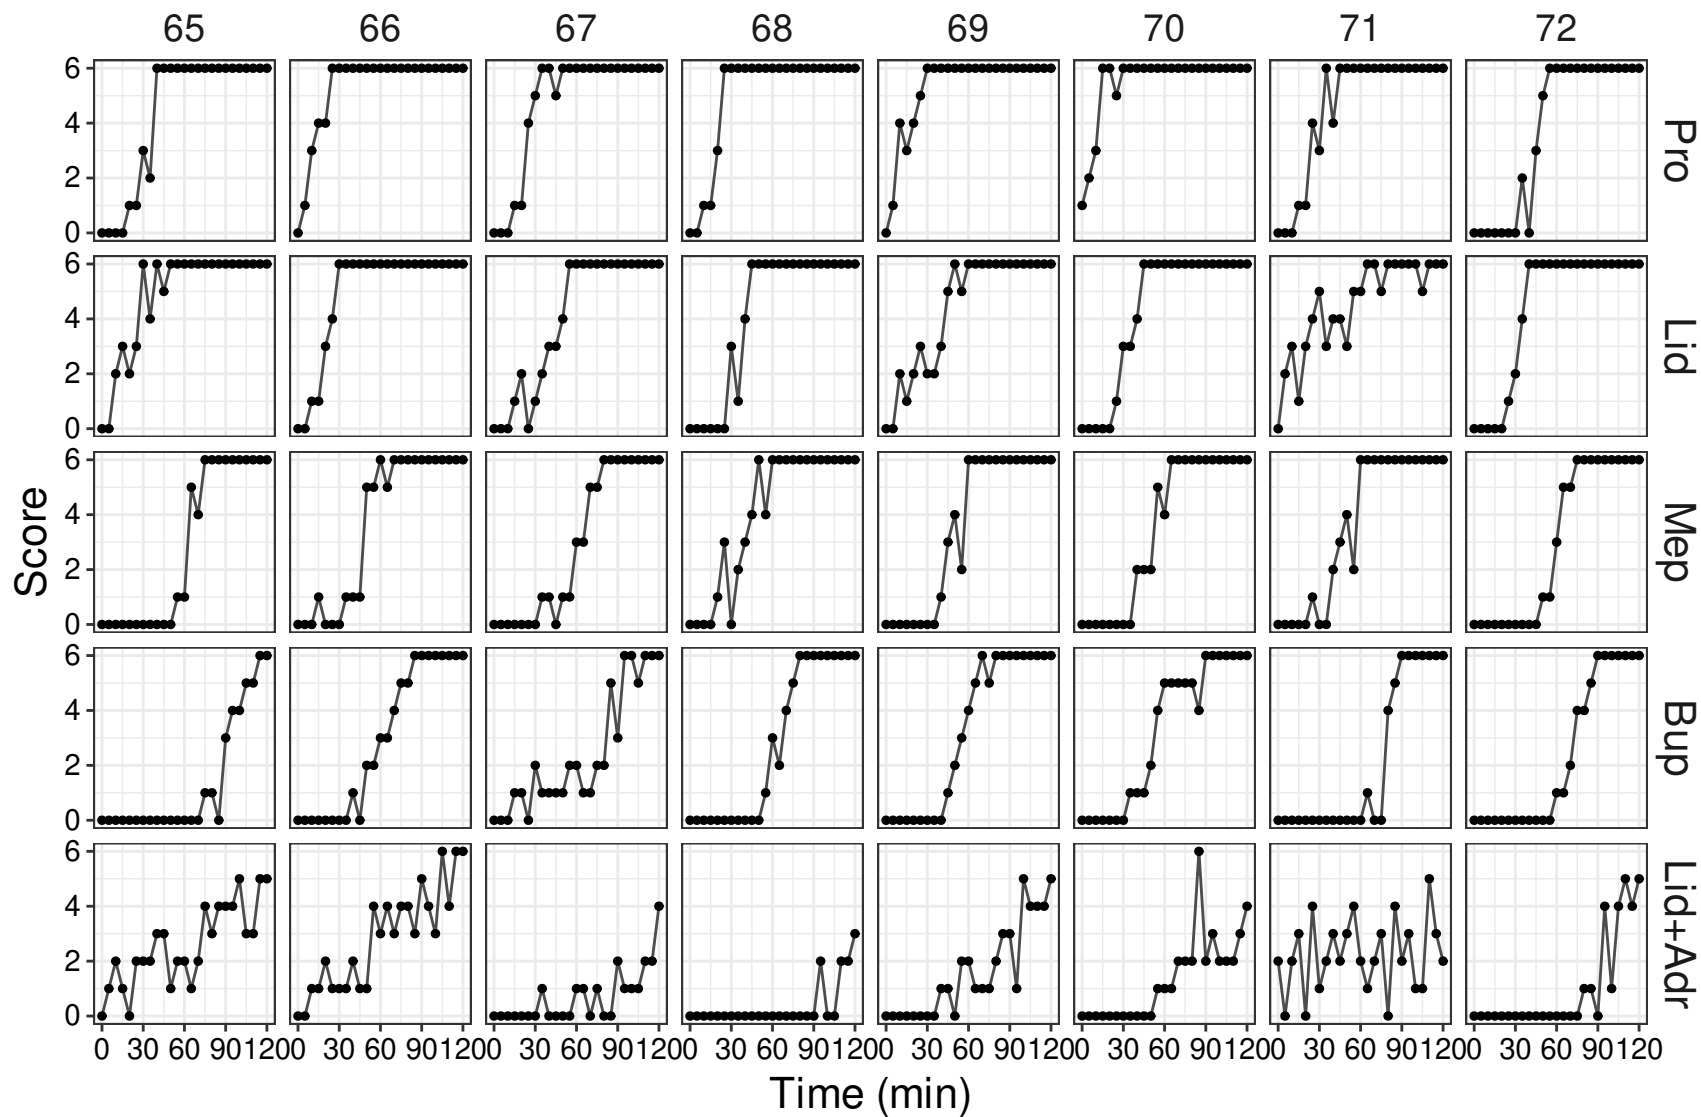

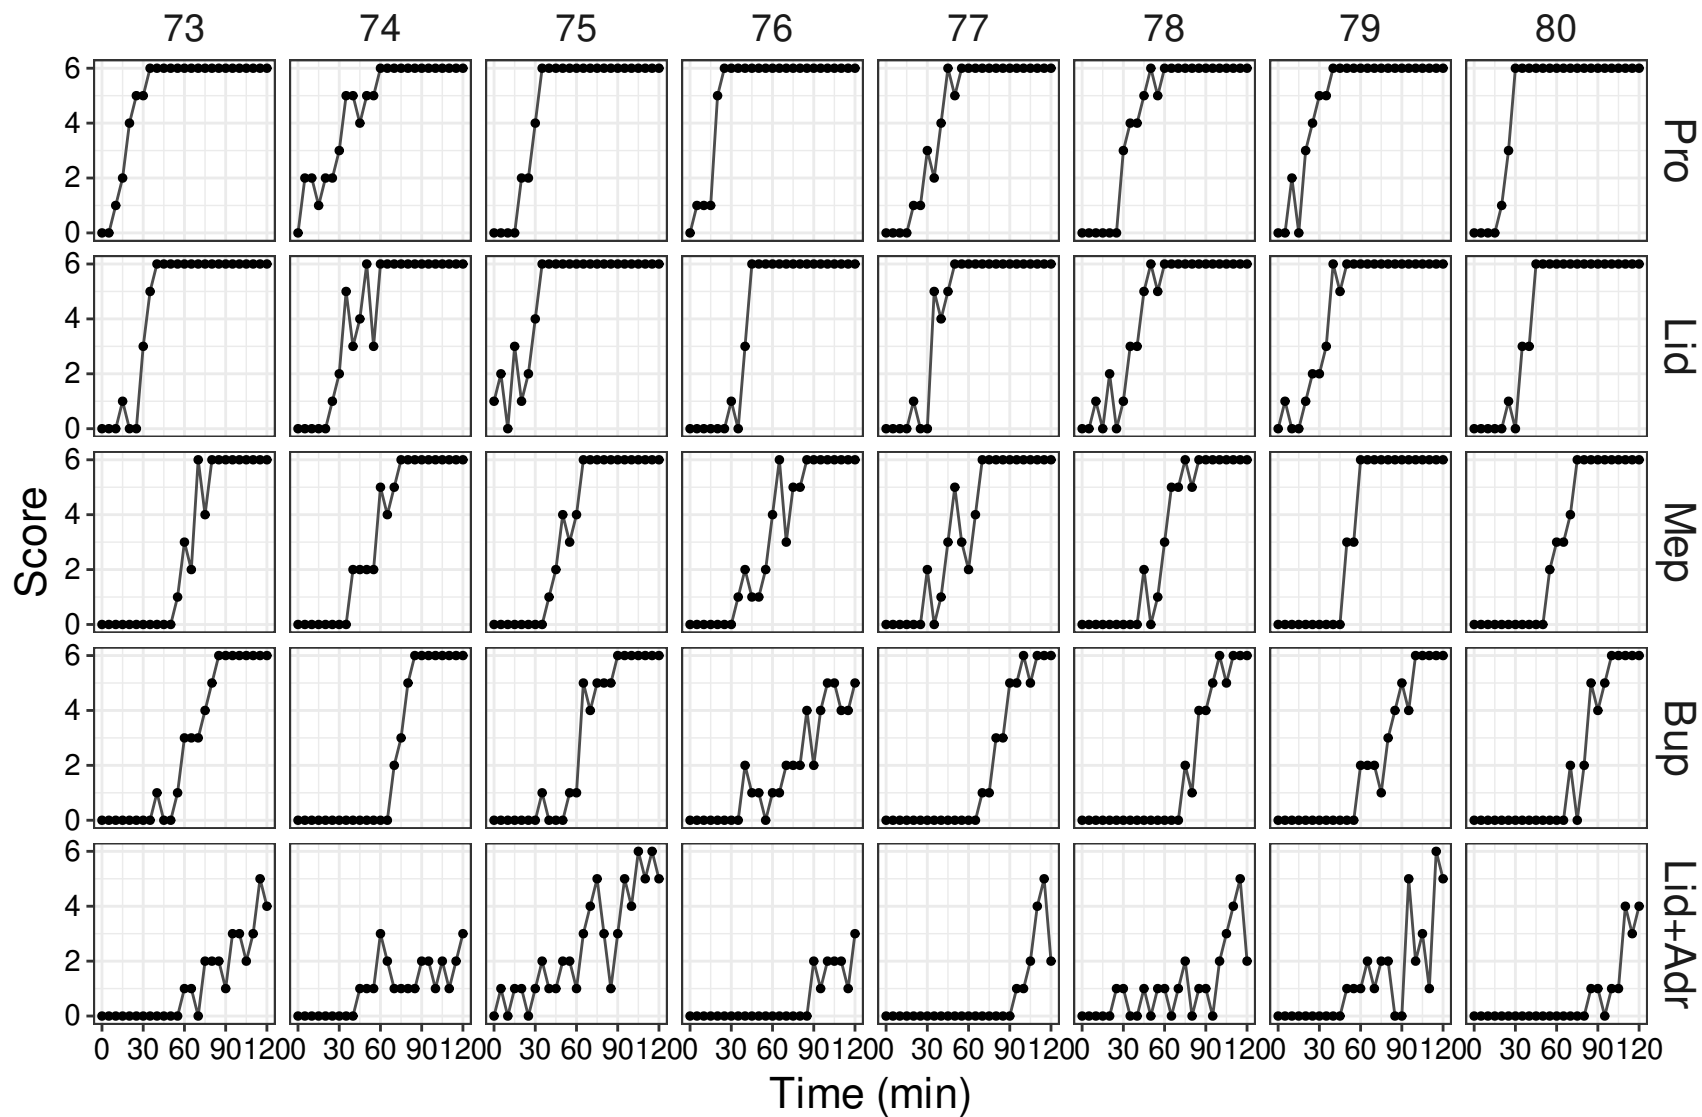

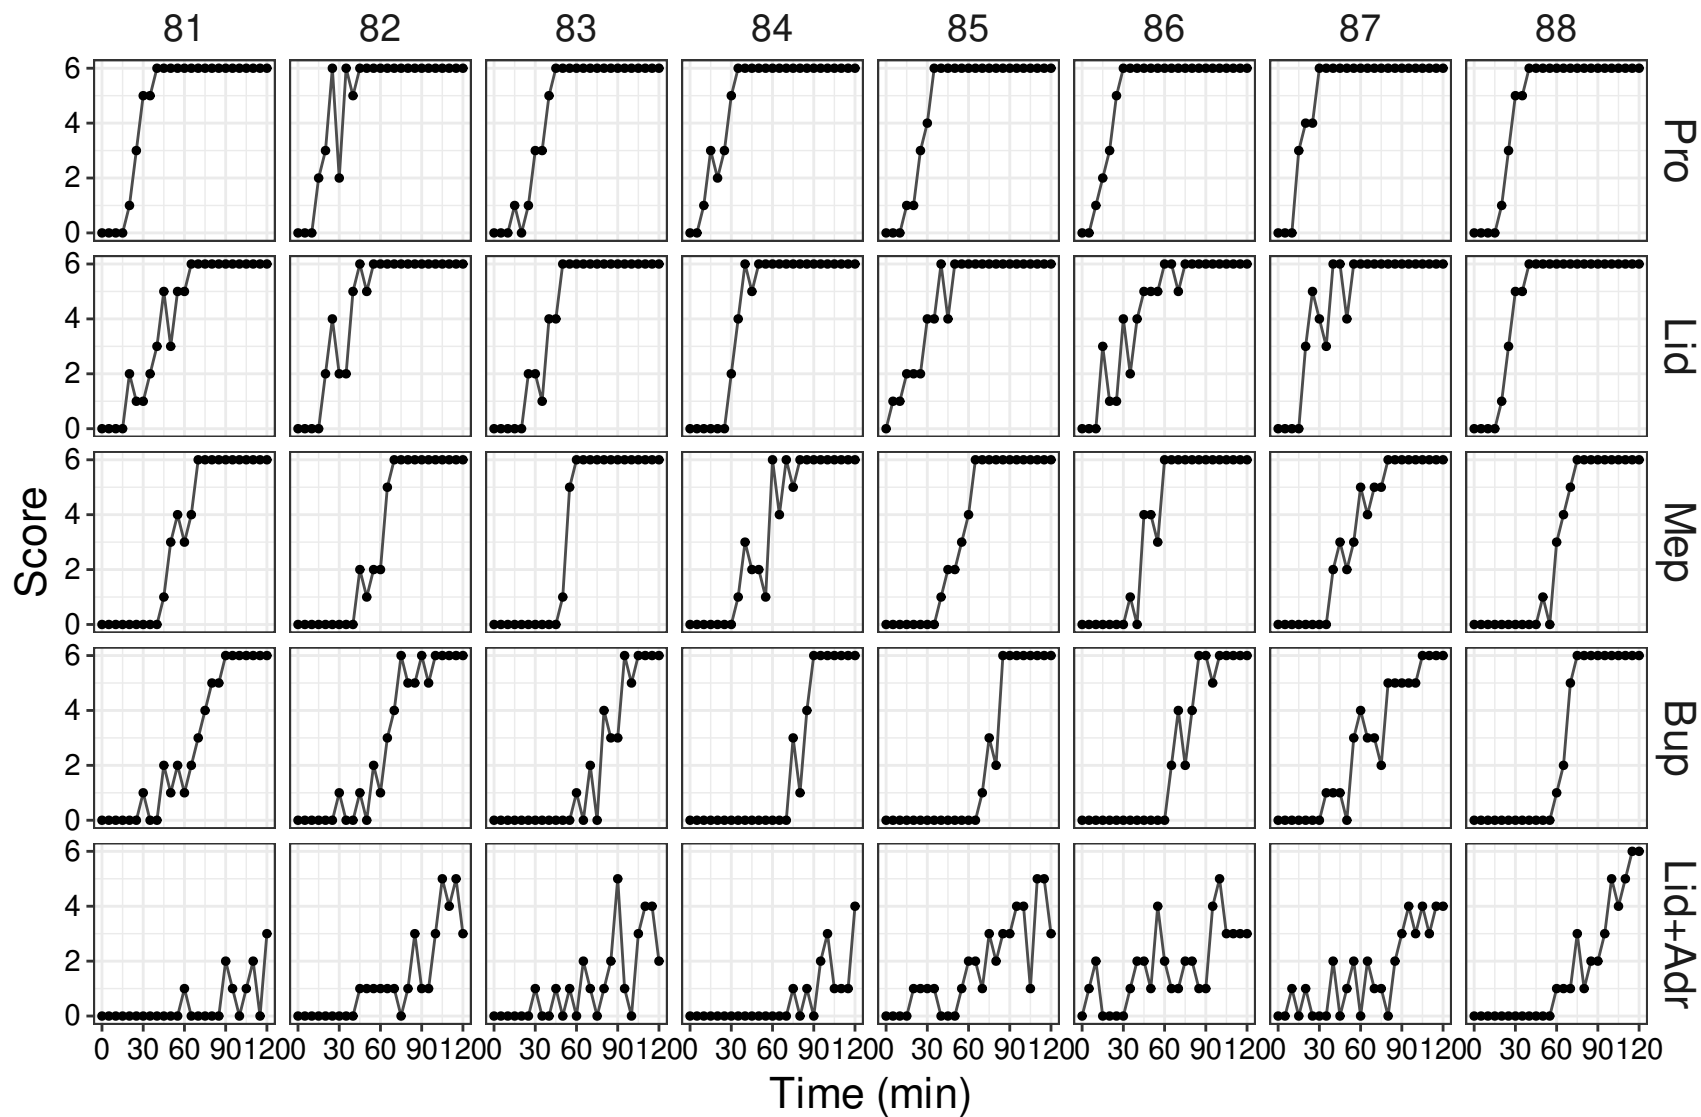

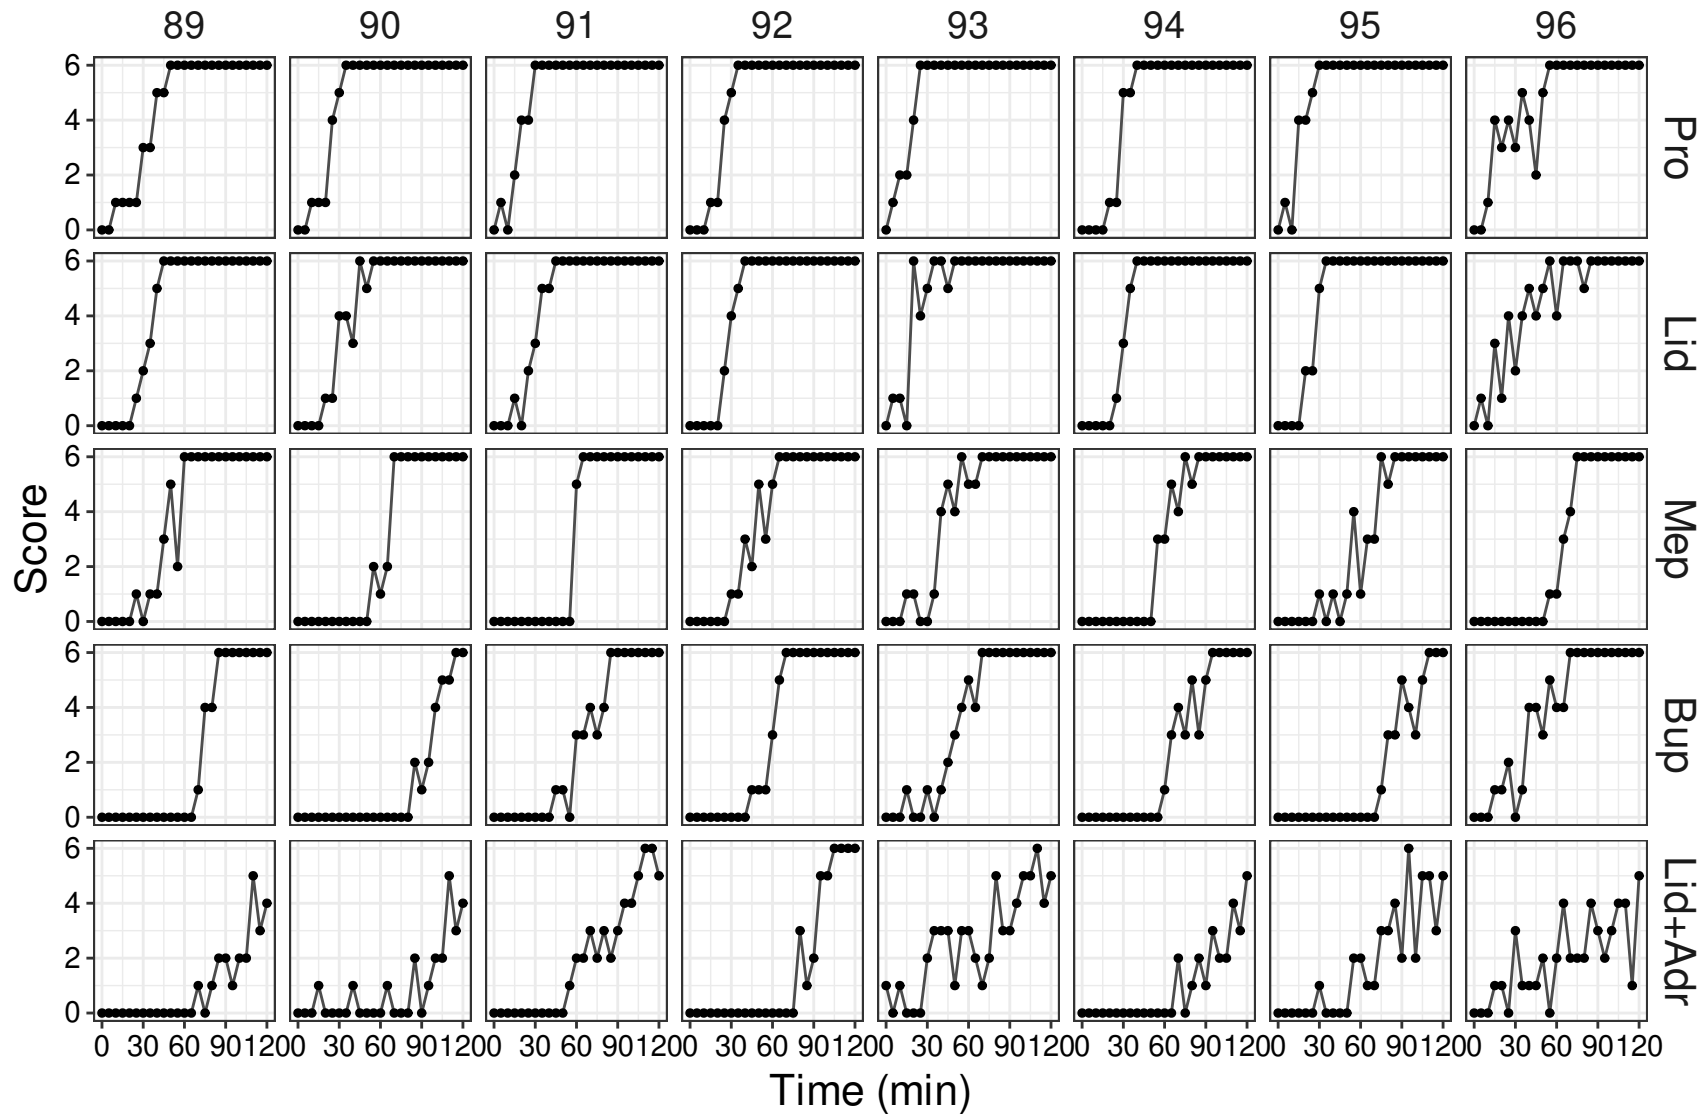

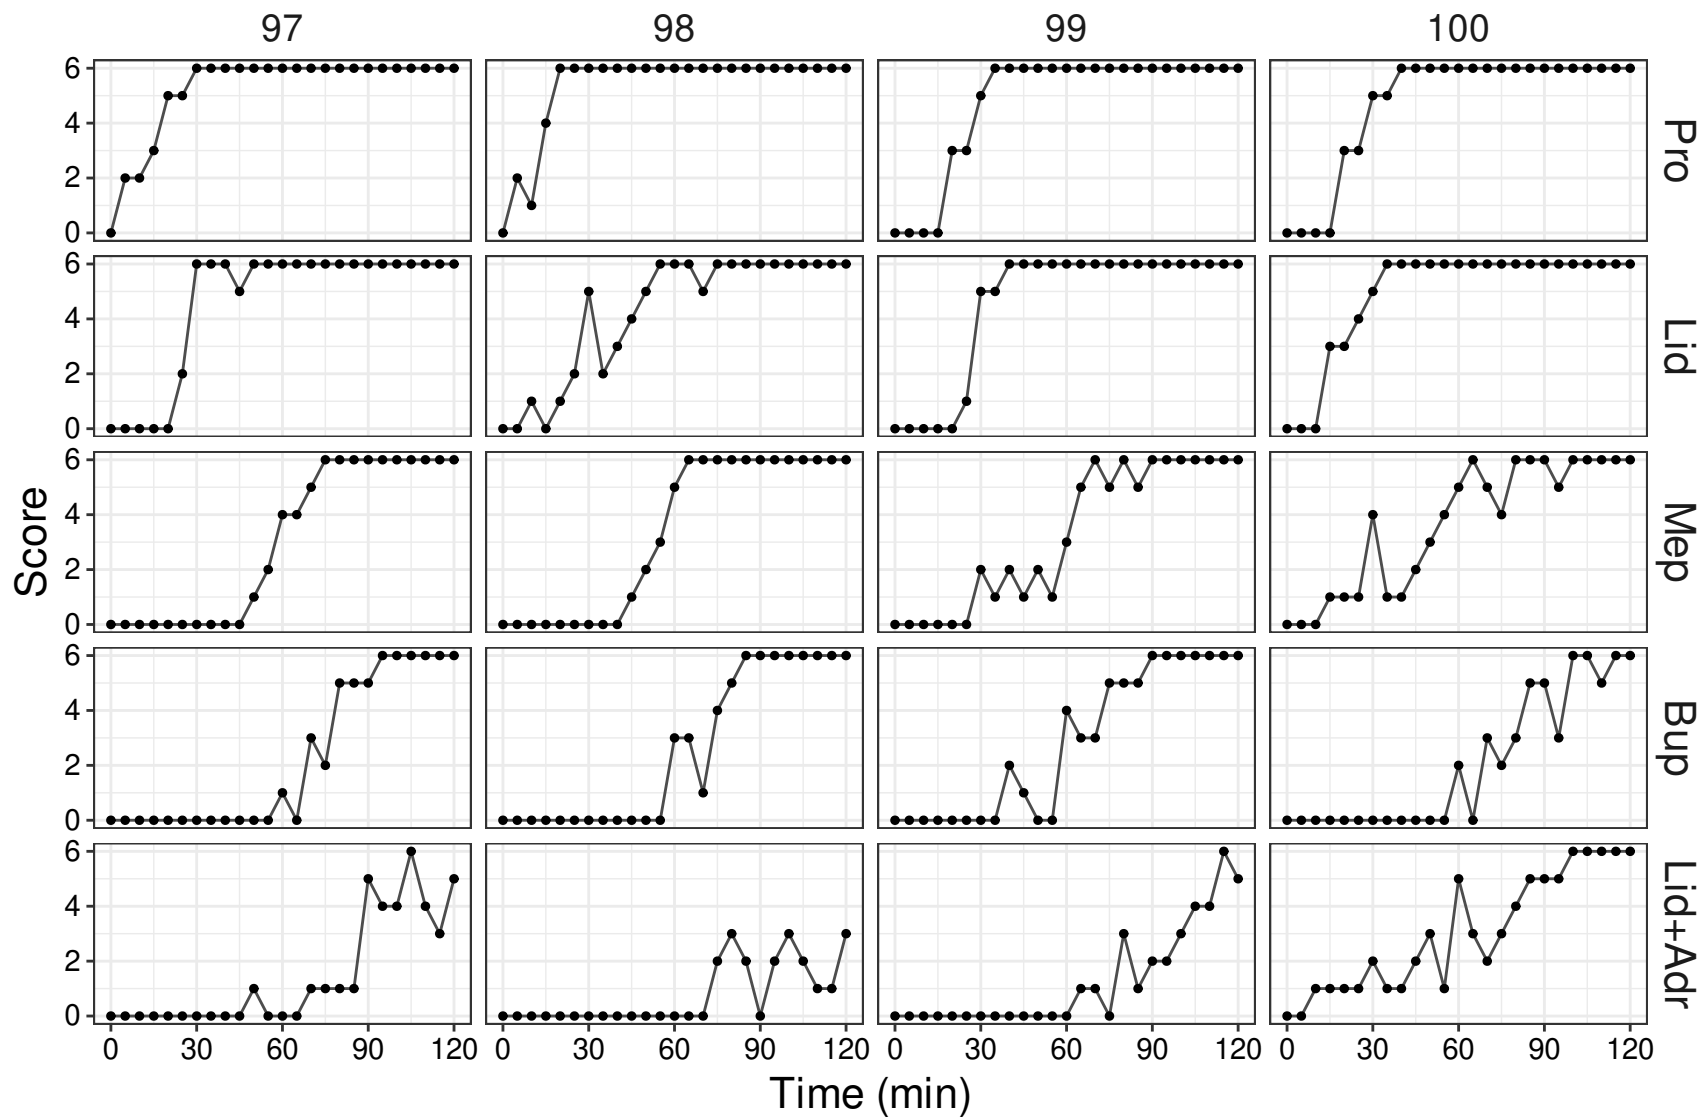

Supplement: s1 [file s1]

# Model 1

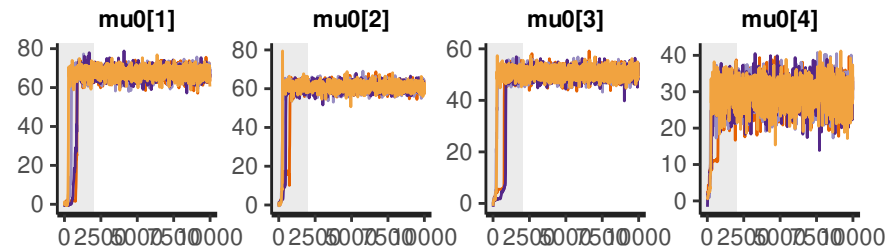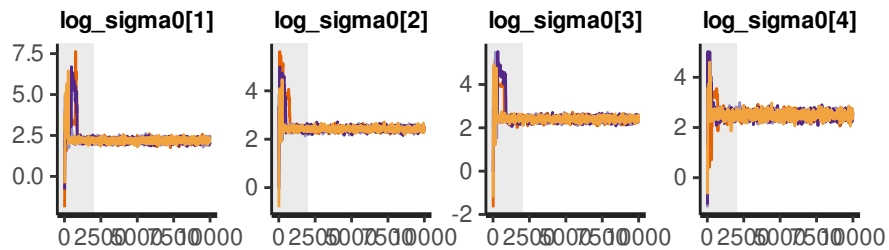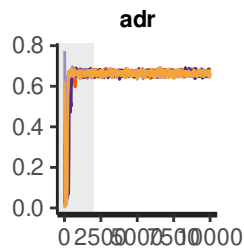

chain

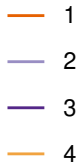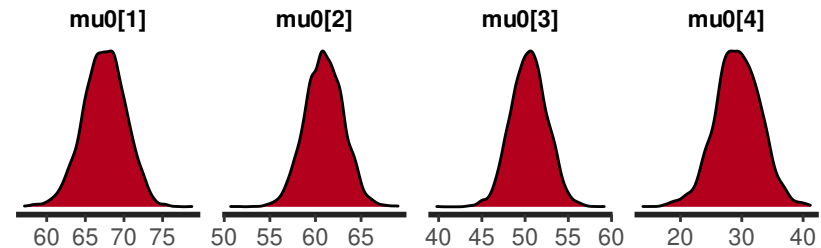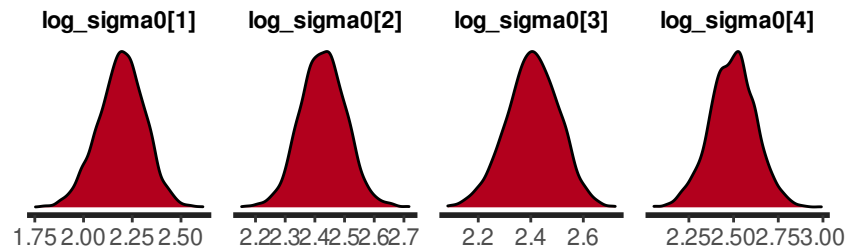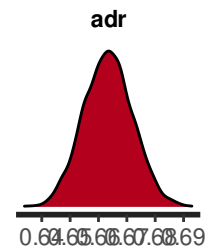

# Model 2

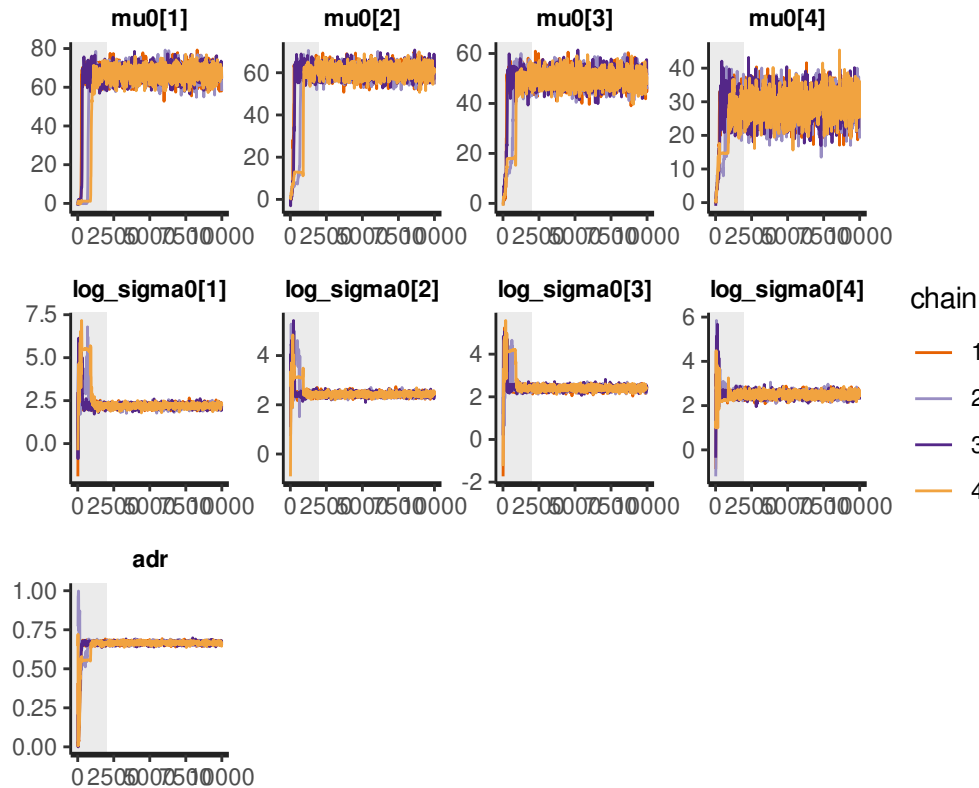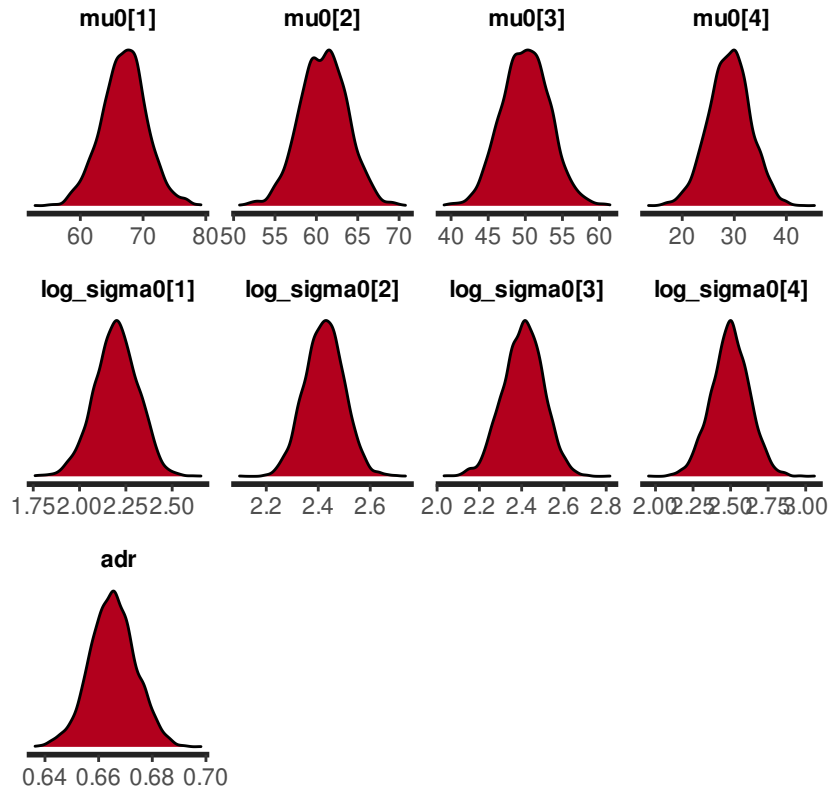

Supplement: s1 [file s1]
